# Supplementary material for: Time-Dependent Molecular Motifs of Pulmonary Fibrogenesis in COVID-19
Source: Int J Mol Sci. 2022 Jan 29;23(3):1583. doi: 10.3390/ijms23031583 (PMC8835897; doi:10.3390/ijms23031583)
Supplement: Supplementary file 1 [file ijms-23-01583-s001.zip]

Archive with 4 entries (4 files):
- Document S1.pdf
- ijms-1568072-supplemental final.pdf
- Table S2.xlsx
- Table S4.xlsx
