# Supplementary material for: Time-Dependent Molecular Motifs of Pulmonary Fibrogenesis in COVID-19
Source: Int J Mol Sci. 2022 Jan 29;23(3):1583. doi: 10.3390/ijms23031583 (PMC8835897; doi:10.3390/ijms23031583)
Supplement: Supplementary file 1 [file ijms-23-01583-s001.zip › ijms-1568072-supplemental final.pdf]

**Table S1.** Clinical information of the study group.

| Patient #                 | Sex    | Age (Years)      | Day of Hospitalization at Death | Mechanical Ventilation | Hospital Site |
|---------------------------|--------|------------------|---------------------------------|------------------------|---------------|
| <b>“Early group”</b>      |        |                  |                                 |                        |               |
| 1                         | Male   | 68               | 3                               | No                     | Hannover      |
| 2                         | Male   | 96               | 3                               | Yes                    | Basel         |
| 3                         | Male   | 78               | 3                               | Yes                    | Basel         |
| 4                         | Male   | 74               | 3                               | No                     | Basel         |
| 5                         | Female | 81               | 4                               | Yes                    | Basel         |
| 6                         | Male   | 80               | 7                               | Yes                    | Ulm           |
| <b>Median (IQR 25–75)</b> |        | 79 (75–80.75)    | 3 (3–3.75)                      |                        |               |
| <b>“Late group”</b>       |        |                  |                                 |                        |               |
| 7                         | Male   | 74               | 12                              | Yes                    | Lüdenscheid   |
| 8                         | Female | 83               | 12                              | Yes                    | Aachen        |
| 9                         | Male   | 63               | 14                              | Yes                    | Hannover      |
| 10                        | Male   | 91               | 14                              | Yes                    | Hannover      |
| 11                        | Female | 68               | 14                              | N/A                    | Ulm           |
| 12                        | Male   | 54               | 21                              | Yes                    | Bremen        |
| <b>Median (IQR 25–75)</b> |        | 71 (64.25–80.75) | 14 (12.5–14)                    |                        |               |
| <b>“Control group”</b>    |        |                  |                                 |                        |               |
| 13–33                     | N/A *  | N/A *            |                                 |                        | Hannover      |

#, number; \* information not publicly accessible due to data protection regulations and respecting the anonymity of donors.

**Table S2.** Raw data/Results of the mRNA expression analysis.

**Table S3.** Increased activity of biological pathways.

| Signaling Pathway                         | Week 1<br>vs. Controls |        | Week 2 and Later<br>vs. Controls |        |
|-------------------------------------------|------------------------|--------|----------------------------------|--------|
|                                           | Regulation             | fdr    | Regulation                       | fdr    |
| ECM structure (NS)                        | up                     | 0.0008 | up                               | 0.0008 |
| Cell adhesion (NS)                        | up                     | 0.0008 | up                               | 0.0091 |
| Collagen Family (NS)                      | up                     | 0.0048 | up                               | 0.0008 |
| Epithelial to mesenchymal transition (NS) | up                     | 0.0048 | up                               | 0.0058 |
| ECM receptor interaction (NS)             | up                     | 0.0062 | up                               | 0.0058 |
| Basement membrane (NS)                    | up                     | 0.005  | up                               | 0.0091 |
| Blood coagulation (NS)                    | up                     | 0.0171 | up                               | 0.1005 |
| Type I interferon signaling (NS)          | up                     | 0.0283 | up                               | 0.1852 |
| MMP remodeling (NS)                       | up                     | 0.0300 | up                               | 0.0195 |
| MHC class I antigen presentation (NS)     | up                     | 0.0300 | up                               | 0.3788 |
| Th 17 differentiation (NS)                | up                     | 0.0300 | up                               | 0.5052 |
| Type II interferon signaling (NS)         | up                     | 0.0323 | up                               | 0.4587 |
| Cell-ECM interaction (NS)                 | up                     | 0.0301 | up                               | 0.0010 |
| Cell proliferation (NS)                   | up                     | 0.0283 | up                               | 0.1413 |
| Cytokine signaling (NS)                   | up                     | 0.0405 | up                               | 0.5052 |
| NF-κB signaling (NS)                      | up                     | 0.0405 | up                               | 0.7046 |
| NLR signaling (NS)                        | up                     | 0.0442 | down                             | 0.6816 |
| Innate immune system (NS)                 | up                     | 0.0341 | down                             | 0.7232 |
| Type I interferon signaling pathway (GO)  | up                     | 0.0433 | up                               | 0.1513 |

|                                                                                        |           |               |           |               |
|----------------------------------------------------------------------------------------|-----------|---------------|-----------|---------------|
| Intrinsic apoptotic signaling pathway in response to endoplasmic reticulum stress (GO) | <b>up</b> | <b>0.0433</b> | <b>up</b> | <b>0.0076</b> |
| Collagen catabolic process (GO)                                                        | <b>up</b> | <b>0.3255</b> | <b>up</b> | <b>0.0076</b> |
| Collagen fibril organization (GO)                                                      | <b>up</b> | <b>0.7186</b> | <b>up</b> | <b>0.0113</b> |
| Extracellular matrix organization (GO)                                                 | <b>up</b> | <b>0.3415</b> | <b>up</b> | <b>0.0076</b> |

NS, calculated using gene-pathway associations supplied by Nanostring; GO, calculated using the GeneOntology database; fdr, false discovery rate.

**Table S4.** More details on significantly regulated biological pathways.

**Table S5.** Semiquantitative analysis of the immunostaining results.

| Target of Antibody  | Early Group |     |     | Late Group |     |     | Controls |     |     |
|---------------------|-------------|-----|-----|------------|-----|-----|----------|-----|-----|
| Compartment         | ENC         | EPC | ECM | ENC        | EPC | ECM | ENC      | EPC | ECM |
| <b>MMP14</b>        | -           | (+) | +   | +          | ++  | ++  | +        | ++  | +   |
| <b>ITGB1</b>        | ++          | ++  | -   | +++        | +++ | +   | +++      | +++ | +   |
| <b>PDGFRB</b>       | -           | -   | (+) | +          | (+) | +   | (+)      | ++  | (+) |
| <b>THBS2</b>        | -           | -   | -   | (+)        | -   | (+) | +        | +   | (+) |
| <b>Collagen I</b>   | -           | -   | (+) | -          | -   | ++  | -        | -   | ++  |
| <b>Collagen III</b> | ++          | +   | (+) | +++        | +++ | +++ | -        | -   | (+) |
| <b>Collagen IV</b>  | ++          | ++  | (+) | +++        | +++ | +   | (+)      | +   | (+) |
| <b>Collagen V</b>   | -           | -   | +++ | +++        | +++ | +++ | -        | -   | ++  |
| <b>Collagen VI</b>  | -           | +++ | +++ | -          | +++ | +++ | -        | -   | +   |

ENC, endothelial cells; EPC, respiratory/alveolar epithelial cells; ECM, extracellular matrix structures; MMP14, matrix metalloproteinase 14; ITGB1, integrin beta type 1; PDGFRB, platelet derived growth factor receptor beta; THBS2, thrombospondin 2. +++, highly positive; ++, intermediate positive; +, slightly positive; (+), partially positive; -, negative.

**Table S6.** Overview of target antibodies used for immunohistochemistry.

| Target of Antibody  | Product Name                                                    | Host Species | Pretreatment     | Dilution | Manufacturer |
|---------------------|-----------------------------------------------------------------|--------------|------------------|----------|--------------|
| <b>MMP14</b>        | Recombinant Anti-MMP14 antibody [EP1264Y] (ab51074)             | Rabbit       | Tris-EDTA buffer | 1:50     | Abcam        |
| <b>ITGB1</b>        | Recombinant Anti-Integrin beta 1 antibody [EPR1040Y] (ab134179) | Rabbit       | Tris-EDTA buffer | 1:200    | Abcam        |
| <b>PDGFRB</b>       | Anti-PDGFR beta antibody [42G12] (ab69506)                      | Mouse        | Tris-EDTA buffer | 1:100    | Abcam        |
| <b>THBS2</b>        | Anti-Thrombospondin 2 antibody (ab112543)                       | Rabbit       | Tris-EDTA buffer | 1:25     | Abcam        |
| <b>Collagen I</b>   | Anti-Collagen I antibody [3G3]—BSA and Azide free (ab88147)     | Mouse        | Tris-EDTA buffer | 1:25     | Abcam        |
| <b>Collagen III</b> | Monoclonal Antibody to Collagen Type III—Aff. Purified—AF5810   | Mouse        | Tris-EDTA buffer | 1:400    | Acris        |
| <b>Collagen IV</b>  | Anti-Collagen IV antibody (ab6586)                              | Rabbit       | Pronase          | 1:50     | Abcam        |
| <b>Collagen V</b>   | Anti-Collagen V antibody (ab7046)                               | Rabbit       | Tris-EDTA buffer | 1:100    | Abcam        |
| <b>Collagen VI</b>  | Recombinant Anti-Collagen VI antibody [EPR17072] (ab182744)     | Rabbit       | Tris-EDTA buffer | 1:200    | Abcam        |

MMP14, matrix metalloproteinase 14; ITGB1, integrin beta type 1; PDGFRB, platelet derived growth factor receptor beta; THBS2, thrombospondin 2.

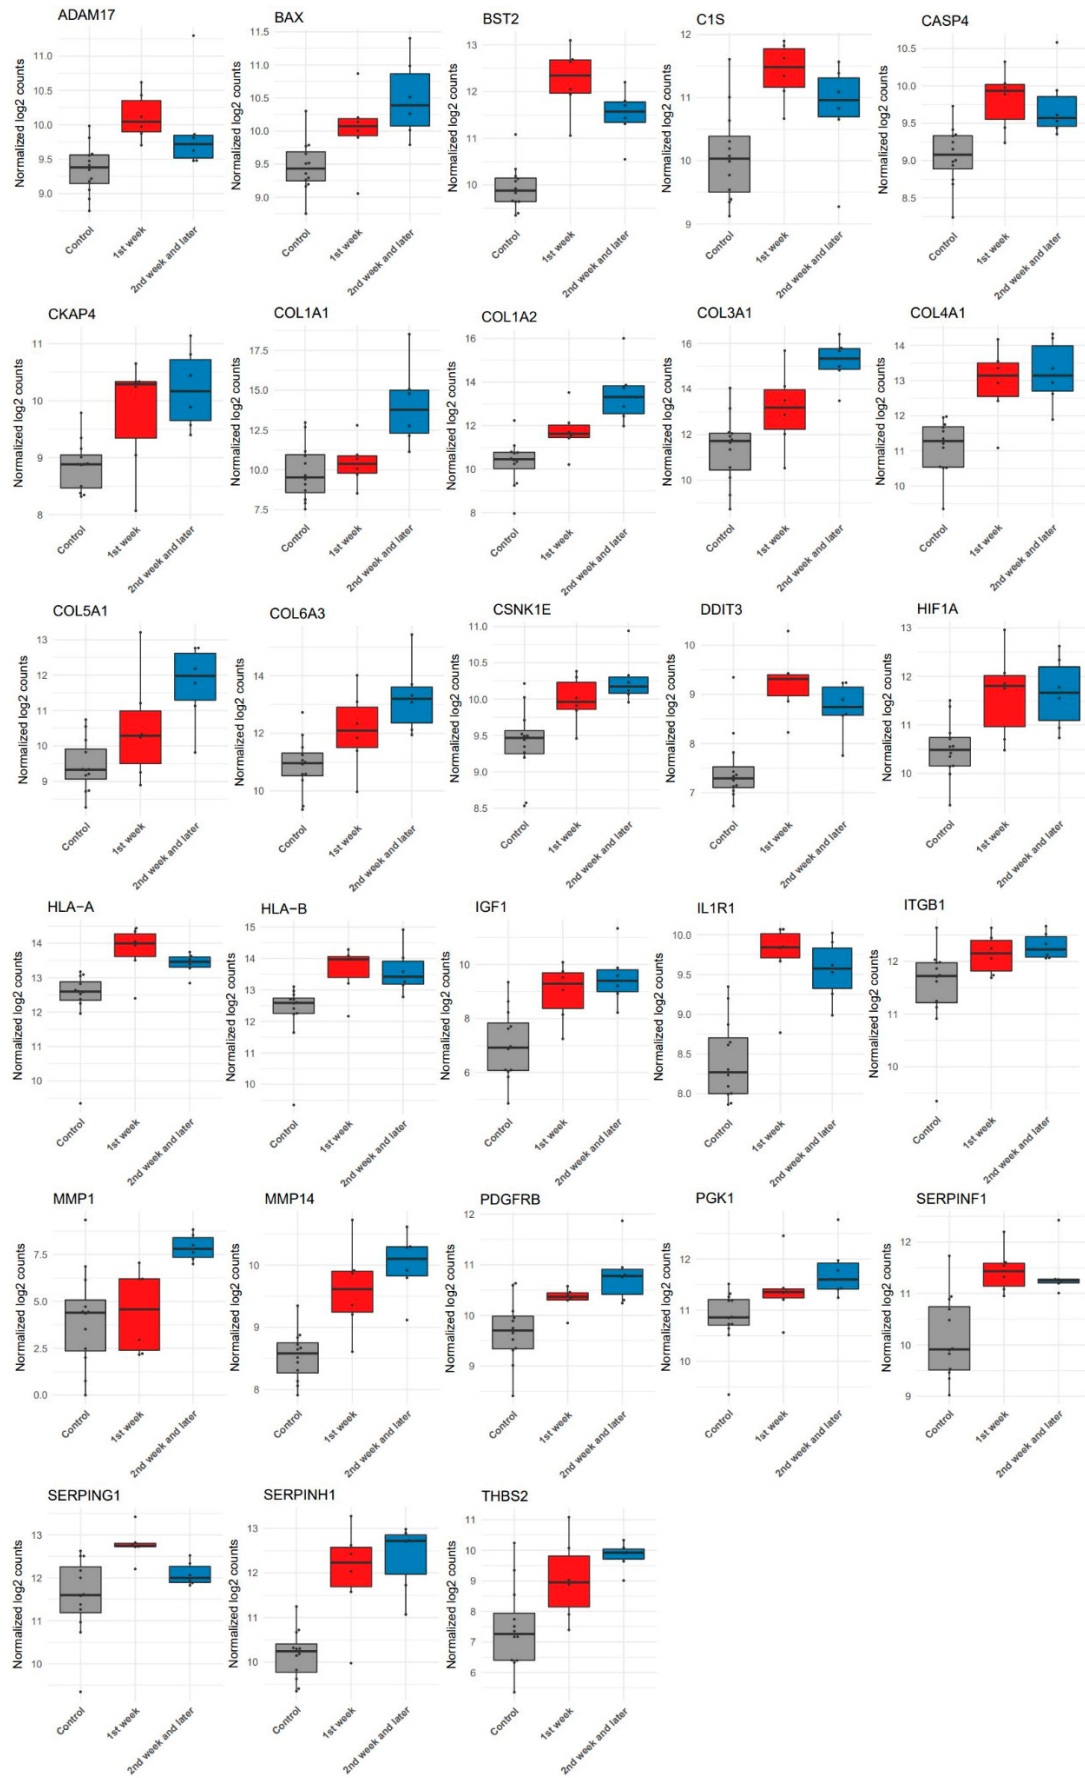

**Figure S1.** Box plots. Box plots of all genes with significantly increased mRNA expression.

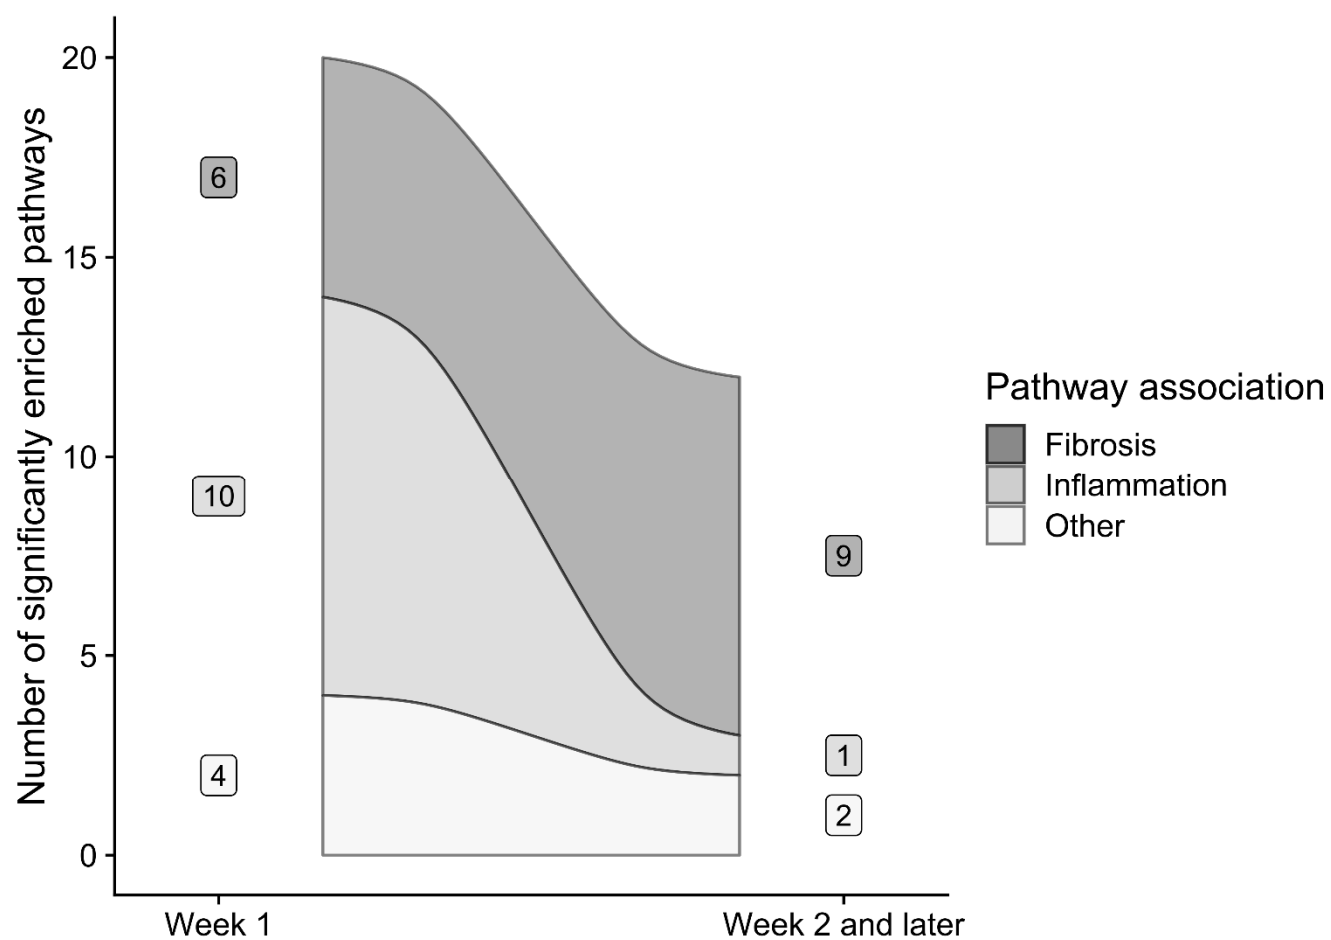

**Figure S2. Flow plot.** Flow plot illustrating the shift from inflammation-related to fibrosis-related pathways. Details on the association of pathways to inflammation and fibrosis are compiled in the supplementary Table S4.

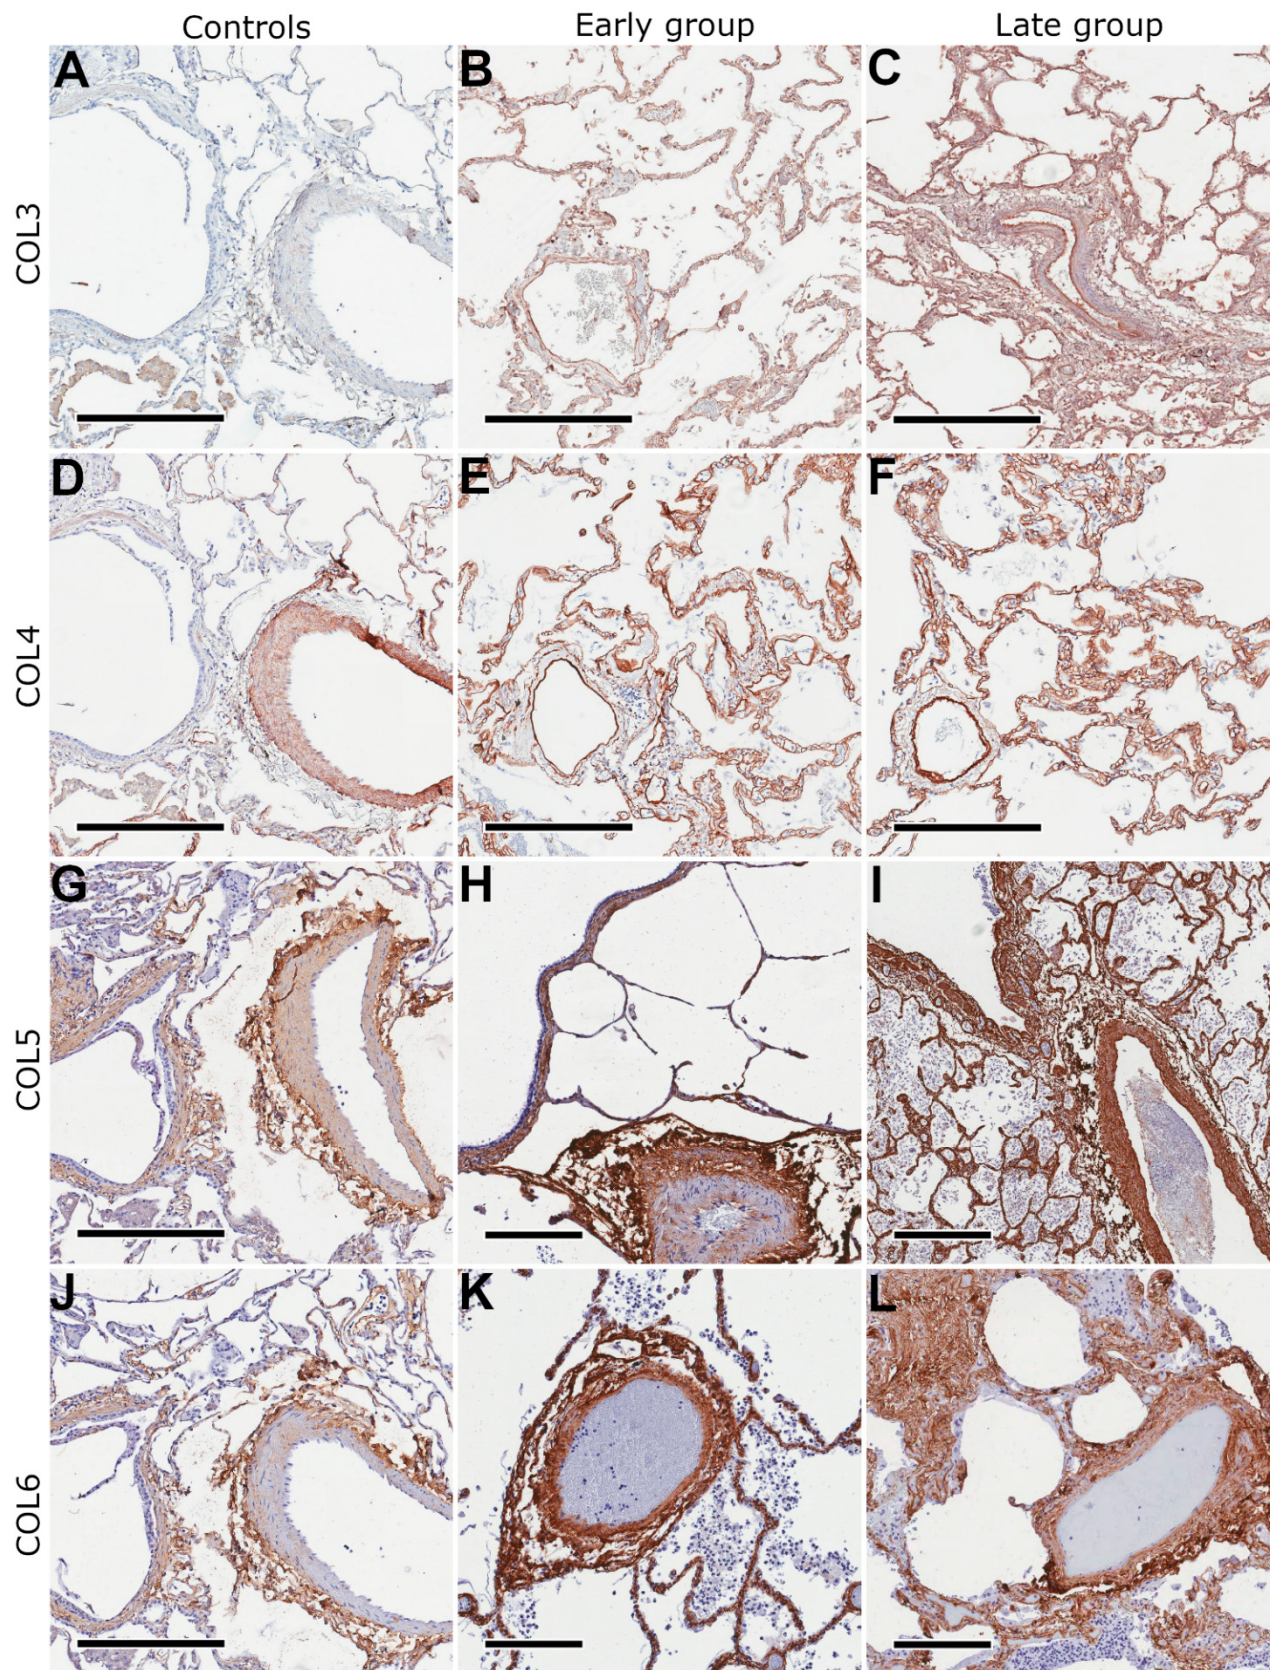

**Figure S3.** Immunostaining of collagens. Immunohistochemical appearance of several collagen subtypes in healthy control lungs, lungs from patients who succumbed to coronavirus disease 2019 (COVID-19) during the first week of hospitalization (early group) and lungs from patients who deceased at least 10 days after hospital admission (late group). In controls,

collagen 3 (COL3) (A) and collagen 4 (COL4) showed a slight enhancement within the bronchiolar wall, the media layer of the pulmonary artery and the alveolar basement membranes (A); COVID-lungs showed the same staining specificity for COL3 with a progression in size of stained structures in the early group (B) and again in the late group (C); COVID-19 lungs showed an enhancement of COL4 predominantly within the internal elastic membrane of pulmonary artery branches and the alveolar basement membrane; in controls, collagen 5 (COL5, (G) and collagen 6 (COL 6, (J) were enhanced predominantly within the perivascular stromal tissue and slightly also within the alveolar septa; in COVID-19 lungs, the staining intensity of both markers appeared higher due to a progression in size of COL5+ (H,I) and COL6+ (K,L) structures corresponding with progressive fibrotic remodeling; compared to the autopsy samples, staining appeared more intensive in healthy controls (C,F,I), presumably due to the higher tissue integrity; scale bars in (A–G, J) equal 300  $\mu\text{m}$ ; scale bars in (H,K,L) equal 200  $\mu\text{m}$ ; scale bar in (I) equals 500  $\mu\text{m}$ .
