# Supplementary material for: Time-Dependent Molecular Motifs of Pulmonary Fibrogenesis in COVID-19
Source: Int J Mol Sci. 2022 Jan 29;23(3):1583. doi: 10.3390/ijms23031583 (PMC8835897; doi:10.3390/ijms23031583)
Supplement: Supplementary file 1 [file ijms-23-01583-s001.zip › Table S2.xlsx]

## Sheet: COVID_Cartridge_Ergebnisse
File Name			20211012_FIBROSE Cartr 1_01 F20 118 I2_01.RCC	20211012_FIBROSE Cartr 1_02 F20 116 III1_02.RCC	20211012_FIBROSE Cartr 1_03 F20 116 IV2_03.RCC	20211012_FIBROSE Cartr 1_04 F20 116 VI2_04.RCC	20211012_FIBROSE Cartr 1_05 F20 116 VII1_05.RCC	20211012_FIBROSE Cartr 1_06 FO20 128 I_06.RCC	20211012_FIBROSE Cartr 1_07 FO20 126 I1_07.RCC	20211012_FIBROSE Cartr 1_08 FO20 123 II1_08.RCC	20211012_FIBROSE Cartr 1_09 H21 858 7_09.RCC	20211012_FIBROSE Cartr 1_10 FO20 121 VIII_10.RCC	20211012_FIBROSE Cartr 1_11 FO20 127 I_11.RCC	20211012_FIBROSE Cartr 1_12 FO20 129 II1_12.RCC
Description			Early group	Early group	Early group	Early group	Early group	Early group	Late group	Late group	Late group	Late group	Late group	Late group
Sample ID			01 F20 118 I2	02 F20 116 III1	03 F20 116 IV2	04 F20 116 VI2	05 F20 116 VII1	06 FO20 128 I	07 FO20 126 I1	08 FO20 123 II1	09 H21 858 7	10 FO20 121 VIII	11 FO20 127 I	12 FO20 129 II1
Owner
Sample Date			2021-12-10	2021-12-10	2021-12-10	2021-12-10	2021-12-10	2021-12-10	2021-12-10	2021-12-10	2021-12-10	2021-12-10	2021-12-10	2021-12-10
File Version			1.7	1.7	1.7	1.7	1.7	1.7	1.7	1.7	1.7	1.7	1.7	1.7
Gene RLF			NS_HS_FIBROSIS_V2.0	NS_HS_FIBROSIS_V2.0	NS_HS_FIBROSIS_V2.0	NS_HS_FIBROSIS_V2.0	NS_HS_FIBROSIS_V2.0	NS_HS_FIBROSIS_V2.0	NS_HS_FIBROSIS_V2.0	NS_HS_FIBROSIS_V2.0	NS_HS_FIBROSIS_V2.0	NS_HS_FIBROSIS_V2.0	NS_HS_FIBROSIS_V2.0	NS_HS_FIBROSIS_V2.0
Comments			Lunge	Lunge	Lunge	Lunge	Lunge	Lunge	Lunge	Lunge	Lunge	Lunge	Lunge	Lunge
Lane ID			1	2	3	4	5	6	7	8	9	10	11	12
FOV Count			555	555	555	555	555	555	555	555	555	555	555	555
FOV Counted			529	547	544	536	547	554	535	540	531	536	537	538
Scanner ID			1309C0112	1309C0112	1309C0112	1309C0112	1309C0112	1309C0112	1309C0112	1309C0112	1309C0112	1309C0112	1309C0112	1309C0112
Stage Position			1	1	1	1	1	1	1	1	1	1	1	1
Binding Density			0.16	0.14	0.18	0.2	0.46	0.15	0.09	0.21	0.35	0.11	0.18	0.13
Messages
Positive	POS_A	ERCC_00117.1	17537	16201	12497	14592	16022	20553	14423	23716	16934	17851	22731	18242
Positive	POS_B	ERCC_00112.1	4600	4229	3283	3868	4423	5500	3958	6409	4697	4802	6181	4736
Positive	POS_C	ERCC_00002.1	1390	1194	1024	1246	1293	1567	1154	1878	1370	1406	1856	1446
Positive	POS_D	ERCC_00092.1	312	272	285	306	289	352	279	467	310	323	405	347
Positive	POS_E	ERCC_00035.1	53	45	42	45	61	60	48	73	52	58	65	58
Positive	POS_F	ERCC_00034.1	27	20	22	30	25	28	15	25	23	23	36	32
Negative	NEG_A	ERCC_00096.1	3	9	2	2	10	3	2	8	6	3	4	2
Negative	NEG_B	ERCC_00041.1	1	1	3	3	8	2	1	11	5	10	4	1
Negative	NEG_C	ERCC_00019.1	2	1	6	11	11	7	1	9	5	1	5	3
Negative	NEG_D	ERCC_00076.1	1	3	2	1	3	2	1	3	6	3	2	3
Negative	NEG_E	ERCC_00098.1	2	5	4	4	10	8	4	7	6	4	8	2
Negative	NEG_F	ERCC_00126.1	7	5	2	6	13	8	3	7	9	4	6	7
Negative	NEG_G	ERCC_00144.1	2	2	1	3	2	2	1	2	7	3	3	2
Negative	NEG_H	ERCC_00154.1	3	1	4	4	9	4	2	3	5	5	3	4
Endogenous	ABCA1	NM_005502.3	575	471	226	317	639	440	99	381	1177	139	881	152
Endogenous	ABCB11	NM_003742.2	6	4	2	2	4	2	3	7	8	3	1	3
Endogenous	ACAA2	NM_006111.2	86	81	82	102	326	70	24	126	214	37	80	47
Endogenous	ACACA	NM_198834.1	16	12	17	30	86	12	13	37	44	4	28	11
Endogenous	ACACB	NM_001093.3	129	18	36	39	36	38	6	51	50	9	25	13
Endogenous	ACOX2	NM_003500.3	13	3	4	9	11	6	1	13	12	1	7	2
Endogenous	ACSL4	NM_004458.2	90	132	110	113	823	79	31	147	520	15	98	37
Endogenous	ACSM3	NM_005622.3	15	10	28	14	50	6	5	16	43	2	13	10
Endogenous	ACTA2	NM_001613.1	1463	368	2052	2000	5959	1133	724	3623	1196	374	1921	1370
Endogenous	ACTR1A	NM_005736.3	281	155	289	284	882	133	45	282	494	43	158	109
Endogenous	ACVRL1	NM_000020.1	484	205	1077	696	677	275	170	598	571	10	269	173
Endogenous	ADA2	NM_001282229.1	40	44	20	53	150	40	4	27	165	13	137	10
Endogenous	ADAM17	NM_003183.4	367	393	437	372	1190	506	86	361	958	150	373	145
Endogenous	ADAM9	NM_001005845.1	229	190	226	377	827	314	154	446	886	45	437	180
Endogenous	ADCY7	NM_001114.4	97	81	74	68	166	84	14	93	153	37	109	41
Endogenous	ADH1B	NM_000668.4	3669	440	1299	1905	3718	2390	838	510	1379	98	1670	460
Endogenous	ADH1C	NM_000669.3	22	1	10	14	26	25	5	7	20	2	24	10
Endogenous	ADH4	NM_000670.3	3	1	2	5	4	1	1	3	7	2	3	2
Endogenous	ADH6	NM_000672.3	3	1	1	1	5	3	1	5	5	1	2	1
Endogenous	ADIPOQ	NM_004797.2	4	2	1	1	3	3	1	2	5	1	6	1
Endogenous	ADIPOR1	NM_015999.3	35	26	18	27	85	38	19	46	105	17	47	28
Endogenous	ADPGK	NR_023318.1	127	93	295	172	655	112	33	181	376	11	208	53
Endogenous	AIM2	NM_004833.1	38	19	35	21	63	14	12	11	49	6	27	1
Endogenous	AKR1B10	NM_020299.3	3	1	1	1	4	17	1	2	3	3	25	2
Endogenous	AKT1	NM_001014432.1	252	218	301	219	688	240	90	404	409	97	274	244
Endogenous	ALAD	NM_000031.5	46	19	32	26	63	19	10	39	45	17	15	17
Endogenous	ALDH3A2	NM_001031806.1	277	104	239	240	695	226	62	228	596	18	191	101
Endogenous	ALDH7A1	NM_001182.3	33	3	14	8	26	16	11	16	14	5	13	16
Endogenous	ALDH9A1	NM_000696.3	206	108	269	364	849	121	81	244	428	32	154	123
Endogenous	ALDOB	NM_000035.3	1	2	3	1	2	2	2	2	3	1	1	1
Endogenous	AMOTL1	NM_001301007.1	217	81	178	190	410	67	46	184	448	34	114	90
Endogenous	AMOTL2	NM_016201.2	138	31	151	53	215	70	24	94	132	26	55	77
Endogenous	ANAPC1	NM_022662.2	37	16	54	62	115	24	16	48	121	1	38	18
Endogenous	ANAPC10	NM_001256710.1	24	10	34	36	102	19	6	26	79	1	19	13
Endogenous	ANAPC7	NM_016238.2	30	20	35	62	112	31	14	42	82	4	23	10
Endogenous	ANGPTL4	NR_104213.1	55	161	555	897	1965	8	46	181	625	6	80	21
Endogenous	AP1G1	NM_001030007.1	227	88	181	194	461	103	35	189	442	7	142	77
Endogenous	AP1S1	NM_001283.3	75	62	162	123	364	99	27	214	246	21	114	66
Endogenous	AP2S1	NM_021575.2	174	203	360	308	958	371	111	507	519	109	316	198
Endogenous	APC	NM_000038.3	38	13	28	43	40	20	6	33	63	5	44	24
Endogenous	APCS	NM_001639.3	3	2	2	5	9	2	3	8	8	1	3	4
Endogenous	APLP2	NM_001243299.1	956	512	633	576	2857	1027	178	794	2181	156	1001	387
Endogenous	APOA1	NM_000039.1	91	3	3	4	7	6	1	4	3	1	2	1
Endogenous	APOA2	NM_001643.1	7	3	1	1	4	1	1	5	8	1	3	2
Endogenous	APOA4	NM_000482.3	1	1	3	1	4	2	1	1	5	1	1	1
Endogenous	APOB	NM_000384.2	5	1	1	3	7	1	1	5	7	1	2	1
Endogenous	APOC2	NM_000483.3	3	3	3	3	4	2	1	3	8	2	5	1
Endogenous	APOC3	NM_000040.1	3	1	5	3	4	3	1	7	2	4	4	6
Endogenous	APOH	NM_000042.2	6	1	1	1	19	5	1	2	14	1	2	3
Endogenous	APP	NM_000484.3	1508	906	1996	1898	4137	1205	406	2260	3406	223	1171	892
Endogenous	AQP8	NM_001169.2	2	2	7	3	5	2	4	11	4	1	3	2
Endogenous	ARG1	NM_000045.3	77	118	61	7	35	14	10	9	49	3	21	2
Endogenous	ARHGAP35	NM_004491.4	164	64	64	67	251	85	27	106	318	11	77	36
Endogenous	ARHGEF2	NM_004723.2	254	303	252	232	705	181	89	324	739	140	238	190
Endogenous	ARHGEF6	NM_004840.2	271	56	99	138	199	73	32	55	254	6	124	30
Endogenous	ARRB1	NM_004041.3	695	208	310	195	430	342	150	367	362	161	294	216
Endogenous	ATF4	NM_001675.2	1863	893	1827	1713	3637	1877	472	1668	4035	375	1501	788
Endogenous	ATF7IP	NM_018179.3	256	75	289	234	316	55	45	172	381	14	120	62
Endogenous	ATG101	NM_021934.4	79	58	113	98	250	64	31	132	298	14	78	49
Endogenous	ATG2B	NM_018036.5	111	34	118	91	154	44	20	64	206	7	89	19
Endogenous	ATOX1	NM_004045.3	123	103	306	265	811	117	53	282	302	9	175	90
Endogenous	ATP6V1E1	NM_001039367.1	467	220	831	466	1815	422	133	428	1060	49	357	189
Endogenous	ATP6V1F	NM_001198909.1	320	402	743	588	2010	591	130	628	1455	160	664	258
Endogenous	ATP6V1G2	NM_130463.2	3	10	6	4	11	4	1	3	18	6	6	3
Endogenous	ATP7A	NM_000052.4	64	16	38	40	83	28	14	46	104	18	34	26
Endogenous	AXL	NM_021913.2	244	78	256	185	603	99	52	285	563	36	183	82
Endogenous	BANF1	NM_001143985.1	140	172	159	253	616	155	56	220	395	95	132	120
Endogenous	BAX	NM_138761.3	235	274	447	446	1263	601	112	616	945	161	808	294
Endogenous	BCAP31	NM_001139457.1	241	216	265	270	785	277	46	307	657	98	250	126
Endogenous	BCL2	NM_000657.2	166	55	93	69	191	46	35	72	95	99	54	62
Endogenous	BCL2L1	NM_138578.1	335	234	616	247	1288	369	153	499	761	54	402	208
Endogenous	BIRC3	NM_182962.1	63	122	90	45	430	44	17	79	133	75	39	16
Endogenous	BLK	NM_001715.2	34	3	6	8	15	3	8	5	25	3	5	8
Endogenous	BMP10	NM_014482.1	1	1	4	1	4	1	3	1	1	2	4	1
Endogenous	BPI	NM_001725.2	10	33	39	5	35	1	5	13	73	2	22	4
Endogenous	BRAF	NM_004333.3	131	63	130	116	290	84	30	128	275	10	85	40
Endogenous	BRPF3	NM_015695.2	35	22	29	42	71	19	7	36	66	1	22	21
Endogenous	BST2	NM_004335.2	933	1203	2856	3438	6775	1257	503	1266	1592	211	1329	554
Endogenous	C1S	NM_001734.2	966	463	1124	1425	3370	1222	287	909	2318	40	1209	324
Endogenous	C3	NM_000064.2	485	411	485	377	2704	313	54	272	1095	17	444	86
Endogenous	C3AR1	NM_004054.2	169	212	140	93	404	95	30	147	197	17	260	25
Endogenous	C4BPA	NM_000715.3	54	5	20	17	423	58	12	12	31	15	14	20
Endogenous	C5	NM_001735.2	26	5	5	11	31	22	2	24	34	1	15	8
Endogenous	C6	NM_000065.2	51	6	21	9	100	18	16	17	78	6	7	4
Endogenous	C8A	NM_000562.2	5	4	3	1	4	5	1	8	7	6	8	4
Endogenous	C8B	NM_000066.2	3	2	5	1	4	1	1	1	7	1	4	1
Endogenous	C9	NM_001737.3	1	3	2	1	4	2	1	3	4	2	2	2
Endogenous	CALM1	NM_006888.3	117	37	124	175	429	112	56	185	199	2	115	94
Endogenous	CAPN5	NM_004055.4	20	15	39	25	87	35	10	44	73	31	84	26
Endogenous	CARD9	NM_052814.3	22	17	16	9	23	18	6	30	32	17	18	26
Endogenous	CASP12	NR_034061.1	4	1	5	4	9	4	3	7	8	8	6	6
Endogenous	CASP3	NM_004346.3	55	64	65	82	265	53	20	99	313	9	102	37
Endogenous	CASP4	NM_001225.3	306	365	455	399	1016	197	85	331	1046	93	279	150
Endogenous	CASP6	NM_032992.2	53	26	42	69	83	49	13	62	125	22	58	41
Endogenous	CASP7	NM_001227.3	80	35	111	143	339	67	19	95	245	10	35	33
Endogenous	CASP8	NM_001228.4	224	119	192	164	242	109	57	163	339	29	123	78
Endogenous	CAT	NM_001752.2	533	174	214	475	1065	223	116	188	677	25	286	103
Endogenous	CBL	NM_005188.2	156	301	114	91	219	179	36	160	295	265	143	71
Endogenous	CCL13	NM_005408.2	23	7	66	4	774	93	18	654	62	31	819	90
Endogenous	CCL19	NM_006274.2	549	461	3547	47	2470	51	63	154	172	83	137	139
Endogenous	CCL2	NM_002982.3	72	258	334	187	8149	66	51	802	718	4	81	118
Endogenous	CCL4	NM_002984.2	114	709	225	110	2455	27	33	84	194	11	130	46
Endogenous	CCN2	NM_001901.2	1033	58	409	263	1983	314	77	212	1617	117	581	198
Endogenous	CCNA2	NM_001237.2	11	23	12	82	109	23	7	57	53	5	16	23
Endogenous	CCR1	NM_001295.2	47	93	187	152	405	56	32	135	242	7	115	28
Endogenous	CCR2	NM_001123041.2	32	141	14	18	78	16	13	68	117	18	32	17
Endogenous	CCR4	NM_005508.4	34	15	67	19	76	29	11	12	79	3	16	2
Endogenous	CCR7	NM_001838.2	21	6	3	6	11	12	3	5	38	3	6	1
Endogenous	CCS	NM_005125.1	210	111	199	187	212	130	79	232	290	97	157	120
Endogenous	CD14	NM_000591.2	187	1365	221	616	843	495	207	879	1966	331	1521	193
Endogenous	CD163	NM_004244.4	583	1229	580	273	2796	1731	166	1524	1660	132	2226	60
Endogenous	CD180	NM_005582.2	14	16	5	9	21	15	11	9	50	10	15	6
Endogenous	CD19	XM_011545981.1	24	3	4	3	8	4	15	3	13	1	3	2
Endogenous	CD209	NM_001144899.1	19	24	3	16	55	24	6	84	46	80	215	20
Endogenous	CD244	NM_001166663.1	4	1	6	4	15	2	2	3	12	2	4	4
Endogenous	CD34	NM_001025109.1	104	40	13	127	131	14	10	71	104	58	26	55
Endogenous	CD36	NM_000072.3	743	270	118	613	1666	167	135	338	556	28	299	87
Endogenous	CD3D	NM_000732.4	69	32	19	34	80	31	17	26	147	10	31	17
Endogenous	CD3E	NM_000733.2	71	31	35	52	54	54	25	24	116	7	37	17
Endogenous	CD3G	NM_000073.2	27	5	7	14	14	6	1	8	32	4	11	3
Endogenous	CD4	NM_000616.4	75	70	111	191	360	92	28	228	373	48	233	61
Endogenous	CD44	NM_001001392.1	831	4095	873	1429	4914	1299	373	2230	5234	2009	1754	877
Endogenous	CD6	NM_001254751.1	40	8	25	6	28	11	5	11	60	3	32	15
Endogenous	CD68	NM_001251.2	168	362	537	215	1930	943	89	571	1964	346	1154	101
Endogenous	CD84	NM_001184879.1	100	26	73	36	117	68	37	109	151	14	213	39
Endogenous	CD86	NM_175862.3	7	14	9	22	154	8	5	25	190	9	53	7
Endogenous	CD8A	NM_001768.5	37	68	31	58	75	36	12	31	141	30	43	32
Endogenous	CD8B	NM_172099.2	4	19	11	16	17	5	5	7	30	6	11	7
Endogenous	CDH2	NM_001792.3	5	2	1	10	20	5	2	21	6	3	12	8
Endogenous	CDH5	NM_001795.3	348	275	311	839	943	191	50	572	667	40	167	130
Endogenous	CDK4	NM_000075.2	62	50	119	99	391	56	15	109	173	22	53	37
Endogenous	CDKN1A	NM_000389.2	157	486	488	299	3028	702	42	509	2152	213	978	190
Endogenous	CDKN2C	NM_001262.2	56	34	42	61	74	49	21	59	96	35	44	42
Endogenous	CDON	NM_016952.4	28	4	7	18	19	2	5	9	30	2	16	6
Endogenous	CEACAM3	NM_001815.3	6	28	9	7	16	4	2	12	10	12	6	5
Endogenous	CEBPA	NM_004364.2	40	22	41	13	108	50	14	46	106	4	91	19
Endogenous	CETP	NM_000078.2	11	5	4	24	13	5	10	21	29	1	11	7
Endogenous	CFH	NM_001014975.2	977	286	598	1466	3043	532	200	775	1541	26	741	291
Endogenous	CFHR1	NM_002113.2	2	4	3	4	4	1	1	6	5	2	2	1
Endogenous	CFHR4	NM_001201550.2	6	4	1	2	7	1	1	2	3	5	2	1
Endogenous	CFHR5	NM_030787.3	1	1	1	2	2	1	1	2	4	2	3	1
Endogenous	CFI	NM_000204.3	84	37	43	143	432	50	20	180	272	13	40	55
Endogenous	CFLAR	NM_001127183.1	711	494	947	620	2758	498	153	409	1200	55	350	146
Endogenous	CFTR	NM_000492.3	4	11	21	4	71	9	12	21	90	8	10	17
Endogenous	CHI3L1	NM_001276.2	187	179	568	70	396	118	59	144	626	26	124	103
Endogenous	CHMP4B	NM_176812.4	114	78	100	74	428	78	28	103	339	19	89	69
Endogenous	CHUK	NM_001278.3	138	113	132	154	300	129	36	164	356	58	114	90
Endogenous	CIITA	NM_000246.3	51	23	66	24	121	41	14	80	100	92	171	34
Endogenous	CKAP4	NM_006825.3	120	346	560	510	1718	173	83	899	1010	135	272	280
Endogenous	COL10A1	NM_000493.3	7	2	2	5	8	10	3	19	25	20	32	22
Endogenous	COL14A1	NM_021110.1	84	44	34	180	392	153	43	215	285	70	140	169
Endogenous	COL16A1	NM_001856.3	67	45	66	175	299	38	42	303	208	163	91	115
Endogenous	COL1A1	NM_000088.3	164	239	468	2797	1766	635	242	17113	7399	21715	1793	5605
Endogenous	COL1A2	NM_000089.3	519	943	1187	4604	3193	1431	591	7369	4270	3811	2991	2723
Endogenous	COL3A1	NM_000090.3	647	2111	1800	20628	12369	5687	1221	28409	30752	5043	12903	10425
Endogenous	COL4A1	NM_001845.4	951	1554	7986	4104	12766	2498	840	10225	4028	1099	2506	2075
Endogenous	COL4A2	NM_001846.2	550	731	2903	1445	4890	1122	455	3729	1681	1482	1050	1053
Endogenous	COL5A1	NM_000093.3	211	346	561	3716	2528	200	98	3461	3736	409	896	929
Endogenous	COL5A3	NM_015719.3	230	38	43	88	173	120	36	401	125	127	70	85
Endogenous	COL6A3	NM_004369.3	439	1464	1590	6491	9317	861	475	6609	10813	2561	1566	1731
Endogenous	COL6A5	NR_022012.2	15	15	56	53	184	11	23	43	123	1	18	22
Endogenous	COL7A1	NM_000094.2	25	12	27	58	139	7	10	148	89	16	27	25
Endogenous	COX4I2	NM_032609.2	139	18	37	42	95	92	25	119	75	21	74	40
Endogenous	COX6A1	NM_004373.2	464	296	648	693	2237	356	120	661	1431	34	471	247
Endogenous	COX6B1	NM_001863.4	525	343	838	647	2027	505	165	729	1316	117	556	298
Endogenous	COX7B	NM_001866.2	236	137	378	411	1775	176	70	329	971	10	206	98
Endogenous	COX7C	NM_001867.2	347	269	360	310	1287	419	148	501	989	100	440	237
Endogenous	CPA3	NM_001870.2	80	30	50	137	340	54	10	160	104	24	61	48
Endogenous	CPB2	NM_001872.3	7	1	8	5	30	12	8	7	8	3	7	5
Endogenous	CPN1	NM_001308.2	4	3	1	1	4	5	3	6	9	1	1	3
Endogenous	CPT1A	NM_001876.3	152	100	111	131	242	79	46	119	172	25	114	62
Endogenous	CR1	XM_006711166.2	232	417	218	107	143	77	22	92	321	6	344	30
Endogenous	CREB1	NM_004379.3	244	196	116	190	319	137	31	204	364	138	138	108
Endogenous	CREB3	NM_006368.4	38	33	53	41	115	31	13	74	123	22	35	25
Endogenous	CREBBP	NM_004380.2	252	179	156	180	387	169	36	180	562	99	170	119
Endogenous	CRK	NM_016823.2	110	110	62	81	246	93	22	144	270	22	67	47
Endogenous	CRKL	NM_005207.3	245	300	254	298	488	191	63	247	581	145	183	139
Endogenous	CRP	NM_000567.2	2	1	5	3	5	4	1	1	5	2	6	1
Endogenous	CSF1R	NM_005211.2	15	51	4	12	28	17	5	27	43	16	86	11
Endogenous	CSF3R	NM_000760.3	983	1393	1327	250	812	151	47	327	908	64	322	51
Endogenous	CSNK1A1	NM_001892.4	270	166	290	438	1533	248	56	356	1578	13	253	102
Endogenous	CSNK1D	NM_001893.3	258	180	250	224	571	105	30	267	715	94	172	89
Endogenous	CSNK1E	NM_152221.2	586	275	548	410	986	229	120	603	1059	118	430	259
Endogenous	CSNK1G3	NM_001031812.1	62	42	45	80	164	41	10	64	207	2	43	24
Endogenous	CSNK2A1	NM_177559.2	75	59	78	96	378	76	16	101	284	13	97	44
Endogenous	CSNK2B	NM_001320.5	358	167	390	283	1337	255	77	486	1123	39	296	142
Endogenous	CTBP2	NM_001329.2	179	115	140	159	303	146	59	175	416	63	126	93
Endogenous	CTNNB1	NM_001098210.1	828	420	927	887	2394	515	204	1068	2488	82	667	388
Endogenous	CTNND1	NM_001331.2	1016	526	842	1145	1446	462	328	830	1500	350	651	575
Endogenous	CTSB	NM_147780.2	532	2435	1230	948	5820	4098	579	4768	9992	465	8651	650
Endogenous	CTSD	NM_001909.3	1366	2983	3053	1753	9509	7849	719	4566	8310	4240	5686	903
Endogenous	CTSL	NM_001912.4	101	242	537	465	3622	377	91	852	2395	14	493	45
Endogenous	CTSW	NM_001335.3	28	26	63	24	33	6	10	19	54	17	18	24
Endogenous	CUL1	NM_003592.2	148	105	134	188	294	109	50	136	409	23	108	50
Endogenous	CUL3	NM_003590.2	82	41	102	126	223	64	32	93	312	4	76	47
Endogenous	CXCL10	NM_001565.2	29	9	231	33	18319	7	3	69	105	8	25	16
Endogenous	CXCL11	NM_005409.4	41	13	1519	103	6020	5	2	121	42	3	45	29
Endogenous	CXCL12	NM_199168.3	77	138	179	297	370	46	65	222	93	129	94	152
Endogenous	CXCL16	NM_001100812.1	157	299	283	124	1102	235	38	317	941	203	482	80
Endogenous	CXCL2	NM_002089.3	188	627	1688	76	7946	103	48	460	2016	58	302	97
Endogenous	CXCL8	NM_000584.2	65	1728	543	54	4935	55	32	627	3413	164	94	12
Endogenous	CXCR1	NM_000634.2	73	105	25	41	29	29	2	17	40	5	19	2
Endogenous	CXCR3	NM_001504.1	5	13	1	11	8	1	3	6	12	3	4	6
Endogenous	CXCR4	NM_003467.2	1872	757	762	687	959	795	115	294	2119	119	1015	58
Endogenous	CXCR6	NM_006564.1	27	17	30	15	57	11	5	8	87	1	25	3
Endogenous	CYBB	NM_000397.3	85	321	89	66	714	253	22	354	700	166	714	80
Endogenous	CYCS	NM_018947.4	15	7	31	14	90	9	5	38	80	12	31	14
Endogenous	CYFIP1	NM_014608.2	211	209	199	201	451	169	80	182	498	158	242	143
Endogenous	CYP1A1	NM_000499.3	6	1	2	4	12	4	13	2	8	1	2	1
Endogenous	CYP1A2	NM_000761.3	3	3	1	2	3	1	2	5	3	3	3	4
Endogenous	CYP27A1	NM_000784.3	116	107	97	59	252	457	23	138	312	108	220	66
Endogenous	CYP2C19	NM_000769.1	1	4	2	1	5	1	1	4	5	1	2	5
Endogenous	CYP2C8	NM_000770.3	3	1	1	3	17	2	1	5	7	1	3	1
Endogenous	CYP2C9	NM_000771.3	2	1	1	4	6	7	5	4	10	2	5	6
Endogenous	CYP2E1	NM_000773.3	5	5	4	2	6	1	5	5	22	3	4	1
Endogenous	CYP2J2	NM_000775.2	19	4	25	7	59	10	2	11	24	1	2	8
Endogenous	CYP4A11/22	NM_001010969.3	8	1	3	2	1	3	1	4	6	1	7	3
Endogenous	CYP7A1	NM_000780.3	1	1	2	2	2	6	1	4	5	3	2	1
Endogenous	CYP8B1	NM_004391.2	2	2	1	3	3	1	1	3	3	1	4	2
Endogenous	DAPK1	NM_001288729.1	152	38	46	37	238	118	19	98	140	34	108	48
Endogenous	DAXX	NM_001350.3	81	65	67	72	260	49	15	118	193	10	57	33
Endogenous	DDIT3	NM_004083.4	281	88	543	274	502	207	43	195	645	39	193	46
Endogenous	DDR2	NM_006182.2	192	57	153	255	448	144	29	179	553	6	129	68
Endogenous	DEPDC5	NM_001136029.2	106	39	63	86	84	38	29	92	171	5	74	43
Endogenous	DERL1	NM_001134671.2	75	81	59	66	331	80	26	81	310	11	93	51
Endogenous	DERL2	NM_016041.3	53	36	42	64	197	47	9	47	306	4	46	15
Endogenous	DIAPH1	NM_005219.4	185	107	341	152	607	106	35	255	471	16	125	84
Endogenous	DLL1	NM_005618.3	53	32	48	53	71	25	24	57	88	17	48	22
Endogenous	DLL4	NM_019074.2	201	159	60	195	143	87	28	146	388	106	157	194
Endogenous	DOCK1	NM_001290223.1	240	83	176	206	371	72	35	206	319	29	111	111
Endogenous	DOCK2	NM_004946.2	233	159	151	111	291	102	65	165	344	32	216	59
Endogenous	DUSP7	NM_001947.2	130	117	378	258	641	98	47	247	271	14	159	84
Endogenous	DUSP8	NM_004420.2	60	38	208	60	479	17	16	54	176	7	36	37
Endogenous	DYNLL1	NM_003746.2	695	640	790	1902	2736	780	387	1168	1987	50	743	687
Endogenous	E2F4	NM_001950.3	54	56	106	95	256	33	33	128	172	8	77	49
Endogenous	EEF2K	NM_013302.3	72	37	33	41	83	47	15	59	119	5	77	25
Endogenous	EGFR	NM_201282.1	177	52	155	136	464	73	23	120	289	16	47	50
Endogenous	EGR1	NM_001964.2	103	64	174	108	353	121	15	84	1671	29	223	31
Endogenous	EHMT1	NM_024757.3	298	130	282	167	435	116	45	242	412	66	202	145
Endogenous	ELN	NM_001081754.1	455	56	251	897	1514	94	57	382	324	581	303	282
Endogenous	ELOVL6	NM_001130721.1	6	11	12	16	85	17	6	38	50	1	17	8
Endogenous	EOMES	NM_005442.2	6	3	3	6	10	1	3	2	9	3	2	4
Endogenous	EP300	NM_001429.2	277	120	222	211	388	142	69	200	559	8	173	98
Endogenous	EP400	NM_015409.3	104	53	83	66	126	47	11	97	154	53	69	52
Endogenous	EPAS1	NM_001430.3	1526	608	1953	1376	2067	1444	343	1413	1406	30	1044	416
Endogenous	EPHX2	NM_001979.5	29	9	29	30	26	7	7	14	40	5	14	11
Endogenous	ERC1	NM_178040.1	137	110	161	156	314	80	48	185	264	26	102	80
Endogenous	ERN1	NM_001433.2	118	99	198	118	360	84	32	105	565	13	136	45
Endogenous	ERO1A	NM_014584.1	359	641	433	514	1195	208	113	465	4240	96	336	146
Endogenous	ERP29	NM_001034025.1	415	322	308	374	1326	543	132	531	1114	211	489	237
Endogenous	F11R	NM_144503.1	287	210	334	243	1415	238	106	311	1005	48	198	99
Endogenous	F5	NM_000130.2	20	31	3	10	22	5	4	17	44	2	10	2
Endogenous	F8	NM_019863.2	102	63	6	162	36	27	3	13	165	1	18	7
Endogenous	FABP4	NM_001442.2	425	57	198	301	636	211	254	287	71	54	40	148
Endogenous	FABP5	NM_001444.1	240	135	210	195	1162	224	239	649	949	122	281	341
Endogenous	FADD	NM_003824.2	31	26	21	16	48	27	15	47	62	15	30	22
Endogenous	FAM30A	NR_026800.2	10	13	5	6	14	3	2	8	15	8	9	1
Endogenous	FAP	NM_004460.2	13	9	15	134	171	54	8	222	440	8	74	86
Endogenous	FAS	NM_000043.4	167	153	303	183	1080	113	34	245	584	28	183	109
Endogenous	FASN	NM_004104.4	97	105	242	61	925	112	67	614	926	120	393	241
Endogenous	FBP1	NM_000507.3	327	88	167	83	630	276	81	320	490	60	488	407
Endogenous	FCAR	NM_002000.2	97	125	85	11	112	17	1	9	71	4	18	2
Endogenous	FCER1A	NM_002001.2	3	5	1	3	12	6	3	5	11	2	8	2
Endogenous	FCER1G	NM_004106.1	661	1263	1065	449	2951	617	216	1050	1590	420	1828	256
Endogenous	FCGR3A/B	NM_000570.4	1046	711	461	827	1692	309	65	382	1436	37	870	61
Endogenous	FCRL2	NM_001159488.1	51	10	3	5	9	12	15	11	16	1	3	6
Endogenous	FGA	NM_021871.2	9	17	18	6	22	6	12	31	77	1	12	1
Endogenous	FGB	NM_005141.3	2	1	5	1	10	6	2	6	9	1	7	4
Endogenous	FGD2	NM_173558.3	371	103	177	82	340	98	54	164	155	91	189	54
Endogenous	FGF19	NM_005117.2	4	2	2	7	5	5	1	6	9	6	3	2
Endogenous	FGF2	NM_002006.4	111	37	158	194	521	58	29	116	686	4	72	42
Endogenous	FGF21	NM_019113.2	6	7	4	6	13	2	4	9	6	7	1	1
Endogenous	FGG	NM_000509.4	5	2	15	4	52	1	47	94	43	2	11	1
Endogenous	FGL2	NM_006682.2	120	49	105	80	402	50	27	123	342	9	244	33
Endogenous	FLI1	NM_001167681.2	132	77	127	166	238	86	23	158	264	2	100	43
Endogenous	FLNB	NM_001164317.1	203	98	207	104	637	97	29	379	395	61	93	78
Endogenous	FLT1	NM_002019.4	337	359	154	743	688	120	21	236	1042	7	158	44
Endogenous	FLT4	NM_002020.1	121	49	53	93	115	33	35	121	144	22	47	63
Endogenous	FN1	NM_212482.1	1219	728	2014	7645	15517	1237	616	6938	13967	174	3514	1554
Endogenous	FNIP2	NM_020840.1	91	78	124	91	391	70	20	139	389	20	67	46
Endogenous	FOXP3	NM_014009.3	4	4	3	4	7	1	3	5	5	1	3	1
Endogenous	FPR1	NM_002029.3	160	294	35	24	120	42	8	67	121	22	80	7
Endogenous	FRS2	NM_006654.3	113	51	136	140	198	73	29	120	271	16	85	64
Endogenous	FST	NM_006350.2	105	14	62	52	615	33	1	35	116	18	31	26
Endogenous	FURIN	NM_002569.2	149	336	246	148	689	274	82	516	454	81	330	124
Endogenous	FZD2	NM_001466.2	14	11	9	11	18	3	5	8	22	4	5	9
Endogenous	FZD5	NM_003468.2	113	79	130	48	260	81	28	95	163	36	82	52
Endogenous	GAB1	NM_002039.3	165	39	68	108	202	57	15	59	165	18	71	44
Endogenous	GAS1	NM_002048.2	133	46	23	34	64	26	6	26	70	33	31	24
Endogenous	GATA3	NM_001002295.1	30	18	28	97	37	21	7	27	50	4	21	7
Endogenous	GBP4	NM_052941.4	259	126	1058	385	3000	157	46	247	391	5	248	128
Endogenous	GBP5	NM_052942.3	143	110	423	90	1411	26	13	160	509	11	204	26
Endogenous	GCNT1	NM_001097633.1	34	21	34	41	77	13	5	39	114	8	33	13
Endogenous	GLI1	NM_005269.1	3	4	6	9	20	3	5	20	7	3	11	10
Endogenous	GLI2	NM_005270.4	17	7	20	33	41	8	6	36	19	16	32	32
Endogenous	GLI3	NM_000168.5	75	23	60	81	129	46	7	74	99	14	31	27
Endogenous	GLP1R	NM_002062.3	7	1	2	1	8	3	3	3	11	1	2	4
Endogenous	GNB4	NM_021629.3	82	65	144	137	374	72	25	128	265	8	160	31
Endogenous	GNG2	NM_053064.4	53	28	33	46	199	24	18	47	106	6	48	32
Endogenous	GNLY	NM_012483.2	39	35	60	89	214	9	10	42	110	8	75	18
Endogenous	GNPTAB	NM_024312.3	102	39	83	94	273	59	23	69	207	1	109	40
Endogenous	GOT2	NM_002080.2	49	42	84	94	311	49	15	118	173	7	60	34
Endogenous	GPC4	NM_001448.2	107	45	96	56	240	46	18	84	243	14	79	37
Endogenous	GPR65	NM_003608.2	22	53	27	39	55	16	8	24	87	9	30	6
Endogenous	GPX2	NM_002083.2	4	5	3	3	20	30	1	11	23	1	23	2
Endogenous	GPX3	NM_002084.3	9849	1718	6335	2149	11678	5361	1272	2434	7458	344	2195	555
Endogenous	GRB10	NM_001001555.2	143	170	95	138	170	177	20	152	214	138	110	76
Endogenous	GREM1	NM_013372.5	5	22	104	127	174	12	18	100	285	2	49	25
Endogenous	GSK3B	NM_002093.2	177	110	166	121	429	120	43	156	320	24	131	78
Endogenous	GZMA	NM_006144.2	35	44	44	89	158	21	15	18	205	8	78	36
Endogenous	GZMB	NM_004131.3	39	111	215	137	916	13	29	70	271	2	127	77
Endogenous	GZMH	NM_033423.3	22	21	18	35	39	7	7	19	62	4	15	11
Endogenous	HADH	NM_001184705.2	88	20	76	99	266	54	21	86	190	5	63	30
Endogenous	HADHA	NM_000182.4	474	311	492	400	1324	324	107	530	1027	96	384	194
Endogenous	HAVCR1	NM_001173393.1	11	1	2	2	7	3	2	7	24	2	12	4
Endogenous	HCAR2	NM_177551.3	159	112	43	49	228	12	5	37	157	33	18	5
Endogenous	HCFC1	NM_005334.2	130	88	152	141	597	64	40	170	295	21	72	65
Endogenous	HCK	NM_002110.2	318	722	298	120	651	149	70	257	394	38	268	65
Endogenous	HDAC4	NM_006037.3	29	45	22	32	49	38	9	30	55	13	26	11
Endogenous	HDC	NM_002112.3	14	17	18	36	61	1	8	41	31	9	2	15
Endogenous	HIF1A	NM_001530.2	731	977	1602	1689	8468	460	183	2577	6696	178	1397	394
Endogenous	HIF3A	NM_152796.2	715	61	227	130	163	137	24	45	189	77	73	9
Endogenous	HIKESHI	NM_016401.4	110	44	99	152	258	99	20	107	368	3	80	43
Endogenous	HKDC1	NM_025130.3	2	8	8	5	19	8	5	19	32	3	17	12
Endogenous	HLA-A	NM_002116.5	5082	4809	9597	6178	22144	1730	1263	4937	13405	626	5453	1465
Endogenous	HLA-B	NM_005514.6	4139	5651	6969	6245	18535	1471	1304	4550	10379	1796	6610	1402
Endogenous	HLA-DPA1	NM_033554.2	256	150	549	217	2220	262	61	327	2453	46	1174	100
Endogenous	HLA-DQA1	NM_002122.3	369	482	3	293	4	5	74	510	2670	224	2022	5
Endogenous	HLA-DQA2	NM_020056.4	1	2	4	4	5	5	1	8	7	1	6	4
Endogenous	HLA-DRA	NM_019111.3	1071	587	1680	835	7179	1217	156	1296	8874	182	4863	365
Endogenous	HLA-E	NM_005516.4	3159	1968	5190	1984	7628	1463	545	1993	4395	344	1959	1000
Endogenous	HLA-F	NM_001098479.1	421	194	714	324	1418	39	74	220	613	20	186	116
Endogenous	HLA-G	NM_002127.4	231	208	240	366	1651	48	36	165	1092	17	211	27
Endogenous	HMGCS2	NM_005518.3	6	8	4	5	13	7	4	13	4	6	3	5
Endogenous	HMOX1	NM_002133.2	156	508	441	232	2661	993	452	1792	2138	48	632	84
Endogenous	HSBP1	NM_001537.2	133	145	74	133	285	114	43	143	203	58	78	99
Endogenous	HSD11B1	NM_181755.1	42	87	804	178	677	198	46	234	215	9	95	43
Endogenous	HSD17B4	NM_000414.2	324	268	243	329	887	423	113	419	748	176	423	218
Endogenous	HSP90AA1	NM_001017963.2	1247	2299	1170	3677	4300	4954	324	1149	12049	79	865	474
Endogenous	HSP90AB1	NM_007355.3	1989	2678	1845	4740	8054	3652	422	2066	8351	663	1162	816
Endogenous	HSPG2	NM_005529.5	835	460	496	584	2115	555	253	1398	1327	677	510	722
Endogenous	HTRA2	NM_013247.4	53	67	41	32	101	51	17	86	90	61	35	36
Endogenous	HVCN1	NM_032369.3	27	27	9	12	27	41	8	30	54	24	33	14
Endogenous	ICAM1	NM_000201.2	244	637	679	349	7818	257	118	762	2130	61	402	274
Endogenous	ICOS	NM_012092.2	8	5	16	7	23	9	6	5	61	3	10	6
Endogenous	IFI27	NM_005532.3	2424	1215	3906	6040	19999	708	845	4282	2839	174	1883	1216
Endogenous	IFI35	NM_005533.3	74	41	373	133	686	46	19	93	95	3	61	51
Endogenous	IFI6	NM_002038.3	604	368	3438	2754	12398	129	174	1101	697	50	150	133
Endogenous	IFNG	NM_000619.2	4	4	11	5	23	2	5	6	13	1	11	2
Endogenous	IFNGR1	NM_000416.2	1537	704	1067	823	2130	777	125	662	2252	91	847	202
Endogenous	IGF1	NM_000618.3	69	154	373	429	790	95	65	387	322	154	197	190
Endogenous	IGF1R	NM_000875.4	112	76	56	56	111	47	19	71	177	50	56	63
Endogenous	IHH	NM_002181.2	1	4	5	2	8	3	4	4	3	6	3	4
Endogenous	IKBKB	NM_001556.1	157	121	114	92	167	92	42	104	224	57	115	63
Endogenous	IL10	NM_000572.2	7	53	1	16	57	9	3	28	82	15	24	5
Endogenous	IL10RA	NM_001558.2	119	146	125	86	344	107	31	165	347	14	210	32
Endogenous	IL11	NM_000641.2	1	3	1	2	20	5	1	17	46	4	3	1
Endogenous	IL12RB2	NM_001559.2	9	3	9	10	17	5	5	8	25	3	5	6
Endogenous	IL13	NM_002188.2	3	1	1	2	9	2	2	2	7	2	2	2
Endogenous	IL17A	NM_002190.2	1	3	5	1	7	4	1	1	1	1	1	2
Endogenous	IL18R1	NM_003855.3	285	308	371	92	148	182	16	88	284	51	123	15
Endogenous	IL1B	NM_000576.2	19	431	5	14	269	3	5	14	77	7	9	6
Endogenous	IL1R1	NM_001320984.1	193	264	466	425	978	264	104	396	1107	47	247	104
Endogenous	IL1RAP	NM_002182.2	112	261	144	234	460	79	26	185	478	71	92	51
Endogenous	IL20RB	NM_144717.2	3	1	4	8	6	3	1	9	18	1	3	1
Endogenous	IL21R	NM_021798.2	12	18	12	29	18	8	8	15	29	3	18	5
Endogenous	IL27	NM_145659.3	5	11	21	9	28	1	5	10	3	1	8	6
Endogenous	IL2RA	NM_000417.1	11	18	6	9	56	35	2	22	29	5	62	3
Endogenous	IL2RB	NM_000878.2	18	26	25	11	69	17	15	31	93	4	29	16
Endogenous	IL33	NM_033439.2	159	133	48	203	328	33	55	253	542	7	50	67
Endogenous	IL4	NM_000589.2	2	4	3	4	8	3	4	7	5	2	5	3
Endogenous	IL6	NM_000600.3	25	319	65	185	5751	16	18	209	4264	21	66	46
Endogenous	IL6ST	NM_002184.2	1020	477	1515	2294	4334	685	255	1174	1918	15	669	285
Endogenous	ILK	NM_004517.2	161	69	152	221	574	103	34	228	357	26	130	71
Endogenous	INPP5D	NM_005541.3	151	58	92	70	194	50	29	63	237	6	122	14
Endogenous	INSR	NM_000208.2	315	94	146	120	431	149	27	164	504	81	143	44
Endogenous	IQGAP1	NM_003870.3	609	313	525	662	1542	342	112	578	1494	16	534	176
Endogenous	IRAK3	NM_007199.1	228	394	188	85	514	189	16	148	299	73	153	29
Endogenous	IRF1	NM_002198.2	109	151	254	64	1708	59	26	149	259	49	75	102
Endogenous	IRF3	NM_001571.5	98	82	64	55	145	61	36	109	148	56	75	44
Endogenous	IRF4	NM_002460.1	99	81	58	34	84	25	33	86	146	47	81	16
Endogenous	IRF8	NM_002163.2	101	42	69	46	293	99	32	79	191	28	181	29
Endogenous	IRS1	NM_005544.2	20	12	9	19	33	27	1	18	58	7	23	16
Endogenous	ISG15	NM_005101.3	295	150	4743	2501	12334	60	95	821	475	42	142	194
Endogenous	ISG20	NM_002201.5	192	145	872	245	2469	148	67	284	508	38	151	51
Endogenous	ITCH	NM_001257138.1	202	95	266	213	556	127	46	236	600	11	207	76
Endogenous	ITGA1	NM_181501.1	611	160	729	822	1225	459	217	755	737	26	480	313
Endogenous	ITGA4	NM_000885.4	111	60	80	79	209	48	44	152	137	15	101	68
Endogenous	ITGA5	NM_002205.2	341	388	1951	584	2241	292	52	1033	1398	97	324	165
Endogenous	ITGA9	NM_002207.2	80	55	70	88	220	70	27	75	84	38	81	78
Endogenous	ITGB1	NM_002211.3	1496	936	1842	2503	5951	1556	459	2918	5467	382	1701	892
Endogenous	ITGB3	NM_000212.2	29	69	67	10	108	9	37	84	104	3	23	11
Endogenous	ITPR2	NM_002223.2	233	124	131	148	243	108	36	188	326	33	195	92
Endogenous	JAG1	NM_000214.2	293	57	180	146	573	150	69	344	298	12	114	65
Endogenous	JAG2	NM_145159.1	89	59	34	193	134	22	16	93	158	9	41	46
Endogenous	JAK1	NM_002227.1	413	288	393	329	1171	244	68	419	846	49	247	118
Endogenous	JAK2	NM_004972.3	247	71	247	143	522	80	22	109	337	12	101	49
Endogenous	JMJD4	NM_001161465.1	44	22	73	32	89	27	19	76	86	13	53	34
Endogenous	JUN	NM_002228.3	458	137	581	486	2085	175	41	175	1086	33	143	76
Endogenous	KANSL1	NM_001193465.1	111	45	78	81	180	51	12	44	214	8	68	18
Endogenous	KAT6A	NM_001099412.1	533	252	476	296	815	194	73	224	665	47	247	106
Endogenous	KDM2A	NM_012308.1	211	106	187	168	445	115	39	186	497	27	141	74
Endogenous	KDM3B	NM_016604.3	130	38	110	93	220	58	23	110	237	4	82	27
Endogenous	KDM5D	NM_001146705.1	158	56	144	135	1	49	31	80	326	6	9	60
Endogenous	KDR	NM_002253.2	357	90	230	285	363	88	47	187	352	4	57	70
Endogenous	KIF3A	NM_007054.5	33	9	27	35	82	10	4	31	76	1	17	6
Endogenous	KIR2DL3	NM_015868.2	15	13	5	15	25	15	7	5	35	6	21	4
Endogenous	KIR3DL1/2	NM_001322168.1	8	4	4	6	8	3	3	7	16	3	7	6
Endogenous	KLF5	NM_001730.3	101	36	106	48	405	43	16	64	456	17	80	39
Endogenous	KLKB1	NM_000892.3	21	4	6	20	7	5	2	13	6	3	4	2
Endogenous	KLRB1	NM_002258.2	46	15	20	22	61	33	15	26	83	7	42	16
Endogenous	KLRD1	NM_007334.2	16	13	17	13	32	7	4	8	24	11	14	6
Endogenous	KLRK1	NM_007360.3	60	33	30	28	67	15	9	15	92	6	32	19
Endogenous	KMT2D	NM_003482.3	133	99	127	113	239	91	31	141	283	12	82	55
Endogenous	KNG1	NM_000893.2	3	4	2	3	3	3	2	7	3	2	5	1
Endogenous	KRAS	NM_033360.2	87	83	112	104	214	51	29	100	237	10	90	37
Endogenous	LAG3	NM_002286.5	24	42	137	85	225	8	12	32	118	4	73	11
Endogenous	LAMA3	NM_000227.3	196	22	50	45	216	85	22	41	127	10	49	40
Endogenous	LAMC1	NM_002293.3	688	265	926	999	2051	478	181	714	1302	38	412	200
Endogenous	LAMTOR2	NM_001145264.1	105	74	126	147	289	93	48	141	232	40	157	56
Endogenous	LAMTOR4	NM_001008395.2	349	316	213	278	552	352	82	318	608	130	378	132
Endogenous	LATS1	NM_004690.2	166	88	161	143	249	100	39	134	314	17	109	75
Endogenous	LATS2	NM_014572.2	222	245	343	185	733	317	66	232	619	282	359	170
Endogenous	LDLRAP1	NM_015627.2	81	22	86	107	138	35	22	70	139	1	39	29
Endogenous	LEP	NM_000230.2	1	4	1	2	9	4	1	4	11	1	7	2
Endogenous	LEPR	NM_001003679.1	347	149	100	325	176	123	61	98	371	19	110	57
Endogenous	LGALS3	NM_001177388.1	382	287	737	819	3021	619	124	643	2861	58	544	214
Endogenous	LGMN	NM_001008530.2	186	127	440	517	2754	282	94	749	1519	49	777	165
Endogenous	LILRB2	NM_001278405.1	145	231	207	180	624	46	53	208	281	11	151	36
Endogenous	LIPA	NM_000235.3	167	65	200	330	805	462	101	240	874	11	703	65
Endogenous	LIPC	NM_000236.2	5	1	10	3	9	2	1	6	15	4	1	3
Endogenous	LIPG	NM_006033.2	2	181	135	52	1032	4	10	135	191	24	22	61
Endogenous	LOX	NM_002317.4	189	74	83	269	411	146	45	422	1554	22	118	66
Endogenous	LOXL1	NM_005576.2	36	14	55	148	289	24	21	134	94	7	79	63
Endogenous	LOXL2	NM_002318.2	16	11	6	25	47	7	12	41	38	7	10	9
Endogenous	LOXL4	NM_032211.6	22	6	11	8	36	19	4	44	37	7	20	18
Endogenous	LPA	NM_005577.2	1	1	1	1	7	1	1	3	3	1	4	1
Endogenous	LPAR5	NM_020400.4	9	3	10	2	27	7	3	12	23	1	13	5
Endogenous	LPCAT1	NM_024830.3	103	247	187	104	442	113	144	342	637	201	257	233
Endogenous	LPL	NM_000237.2	178	21	281	80	662	121	23	137	286	9	78	57
Endogenous	LRP1	NM_002332.2	568	503	601	914	1404	551	188	836	1655	137	807	344
Endogenous	LRP2	NM_004525.2	3	3	4	2	47	3	12	24	60	3	29	4
Endogenous	LRP6	NM_002336.1	126	45	105	112	170	61	41	98	183	29	71	70
Endogenous	LRRC32	NM_001128922.1	40	125	43	67	131	58	13	108	117	65	48	33
Endogenous	LTA	NM_000595.2	2	8	5	5	18	1	8	12	13	4	1	3
Endogenous	LTB	NM_002341.1	50	146	18	23	29	74	27	36	71	69	54	58
Endogenous	LYN	NM_002350.3	319	324	359	204	1592	109	44	205	743	10	199	50
Endogenous	MAF	NM_005360.4	341	170	227	316	543	136	68	319	527	128	291	118
Endogenous	MAML1	NM_014757.4	159	80	142	137	311	77	26	98	314	13	81	47
Endogenous	MAML2	NM_032427.2	123	40	109	82	386	59	20	99	214	7	79	30
Endogenous	MAML3	NM_018717.4	93	40	85	58	154	16	8	48	93	5	32	12
Endogenous	MAP1LC3A	NM_032514.2	318	159	135	124	418	198	62	190	427	73	214	107
Endogenous	MAP2K1	NM_002755.2	107	149	133	125	388	123	21	143	560	20	168	55
Endogenous	MAP3K1	NM_005921.1	142	56	124	124	270	56	20	100	199	3	97	32
Endogenous	MAPK1	NM_138957.2	356	129	345	390	724	149	68	220	681	12	215	101
Endogenous	MAPK10	NM_138981.2	49	9	17	59	86	12	13	40	91	6	31	14
Endogenous	MAPK11	NM_002751.6	90	58	55	81	183	45	13	99	100	21	33	54
Endogenous	MAPK8	NM_002750.2	53	32	53	78	129	33	6	60	160	14	54	30
Endogenous	MAPK9	NM_001135044.1	142	56	128	174	336	82	48	108	268	1	108	38
Endogenous	MARCO	NM_006770.3	65	209	134	34	484	170	15	100	209	37	102	20
Endogenous	MASP1	NM_001031849.2	24	9	11	12	32	13	7	68	10	2	17	10
Endogenous	MBTPS2	NM_015884.3	48	19	47	56	192	36	16	61	82	8	42	18
Endogenous	MECP2	NM_001110792.1	185	73	182	138	324	97	34	149	341	26	145	73
Endogenous	MEF2A	NM_005587.2	650	301	890	902	1287	307	123	487	1124	46	442	186
Endogenous	MEFV	NM_000243.2	68	90	51	36	113	29	6	34	64	7	55	8
Endogenous	MET	NM_001127500.1	44	40	29	26	207	21	14	36	329	13	33	20
Endogenous	MFAP3	NM_001242336.1	34	35	34	47	66	28	9	38	178	31	33	24
Endogenous	MKI67	NM_002417.2	4	14	21	33	88	5	12	61	36	1	19	30
Endogenous	MLXIPL	NM_032951.2	3	7	4	1	25	3	1	11	21	3	4	8
Endogenous	MMP1	NM_002421.3	6	41	5	6	86	28	29	104	490	13	55	77
Endogenous	MMP10	NM_002425.1	5	4	11	2	11	1	11	25	137	5	4	3
Endogenous	MMP11	NM_005940.3	2	5	2	8	6	7	6	20	21	9	14	16
Endogenous	MMP12	NM_002426.3	1	3	6	8	15	3	1	12	17	1	2	6
Endogenous	MMP13	NM_002427.2	2	1	4	3	13	1	3	3	27	6	2	2
Endogenous	MMP14	NM_004995.2	173	189	419	668	1001	193	61	625	1339	95	388	180
Endogenous	MMP16	NM_005941.4	7	3	6	5	8	5	4	8	6	1	2	4
Endogenous	MMP2	NM_004530.2	434	298	826	1304	2717	1315	139	700	3386	60	1189	213
Endogenous	MMP3	NM_002422.3	25	3	3	4	7	3	1	8	9	2	2	3
Endogenous	MMP7	NM_002423.3	11	5	9	4	166	55	2	30	525	17	70	14
Endogenous	MMP8	NM_002424.2	7	50	30	7	14	7	3	9	37	1	16	1
Endogenous	MMP9	NM_004994.2	75	744	227	20	46	13	5	23	104	70	17	70
Endogenous	MMRN1	NM_007351.2	185	98	108	108	401	138	14	159	125	9	65	21
Endogenous	MMUT	NM_000255.2	86	13	86	66	191	62	23	75	213	1	50	22
Endogenous	MOB1B	NM_173468.3	68	43	115	52	206	51	31	94	188	36	67	41
Endogenous	MS4A1	NM_152866.2	171	9	4	10	36	11	27	15	54	4	6	7
Endogenous	MS4A2	NM_000139.3	21	12	5	29	28	4	3	4	9	1	5	5
Endogenous	MS4A4A	NM_024021.2	54	203	217	147	1328	436	46	305	1215	19	784	14
Endogenous	MTMR4	NM_004687.4	112	90	110	95	219	138	30	80	235	12	88	59
Endogenous	MTOR	NM_004958.3	117	66	124	109	189	62	23	151	227	52	60	59
Endogenous	MUC5B	NM_002458.1	93	73	95	22	172	7	7	22	563	18	24	11
Endogenous	MYD88	NM_002468.3	220	382	335	338	1126	164	70	354	737	44	243	169
Endogenous	MYL2	NM_000432.3	1	1	1	1	8	1	1	2	1	2	3	2
Endogenous	MYLK	NM_053032.2	1004	239	1534	1293	2491	776	437	1092	1193	149	923	529
Endogenous	NCAM1	NM_000615.5	25	5	16	50	42	3	4	6	20	1	10	9
Endogenous	NCEH1	NM_020792.4	49	37	103	57	440	80	21	113	271	18	126	29
Endogenous	NCF1	NM_000265.4	146	251	119	64	193	61	24	63	145	49	69	17
Endogenous	NCF4	NM_000631.4	263	314	108	53	160	68	37	148	194	86	130	31
Endogenous	NCK2	NM_001004720.2	122	105	101	90	314	84	32	158	199	19	93	59
Endogenous	NCKAP1L	NM_005337.4	125	95	156	79	287	145	46	187	269	3	447	29
Endogenous	NCOA2	NM_006540.2	155	69	119	110	239	87	40	65	202	16	95	31
Endogenous	NCOR2	NM_006312.3	745	418	507	417	1258	342	166	798	1348	270	386	389
Endogenous	NCR1	NM_004829.5	30	54	17	17	31	6	4	5	27	4	27	6
Endogenous	NCSTN	NM_015331.2	216	113	229	323	718	153	58	228	495	10	214	95
Endogenous	NDUFA1	NM_004541.3	553	380	674	671	2001	572	279	848	1632	177	704	412
Endogenous	NDUFB5	NM_002492.3	144	69	161	213	578	167	36	204	539	13	180	64
Endogenous	NDUFB6	NM_002493.5	156	116	219	227	481	147	60	281	291	40	163	164
Endogenous	NDUFB8	NM_001284367.1	317	145	359	299	873	225	121	444	753	69	293	144
Endogenous	NDUFC1	NM_002494.2	291	246	294	379	831	218	116	434	793	159	220	189
Endogenous	NDUFS3	NM_004551.1	181	96	233	262	582	142	44	263	460	30	142	128
Endogenous	NDUFS5	NM_004552.2	509	377	761	715	2564	542	215	1124	1434	102	687	442
Endogenous	NEDD8	NM_006156.2	245	124	316	330	1076	141	76	263	587	11	150	110
Endogenous	NF1	NM_000267.2	195	147	139	160	485	108	32	224	513	83	136	67
Endogenous	NFAM1	NM_145912.5	12	80	20	7	23	36	10	17	64	23	77	4
Endogenous	NFKB1	NM_003998.2	31	56	32	42	368	33	18	34	203	4	47	14
Endogenous	NID1	NM_002508.2	634	235	617	548	946	659	126	712	916	153	302	220
Endogenous	NID2	NM_007361.3	128	107	79	318	441	91	25	446	285	159	132	112
Endogenous	NKG7	NM_005601.3	94	582	233	210	421	21	64	58	250	10	106	62
Endogenous	NLRC4	NM_001199138.1	50	80	49	37	43	53	17	56	107	12	74	18
Endogenous	NLRP3	NM_001079821.2	23	37	10	7	218	11	5	17	67	10	41	5
Endogenous	NOS1	NM_000620.4	21	11	9	9	20	18	5	14	10	1	10	4
Endogenous	NOS3	NM_000603.4	96	60	337	51	164	13	25	154	123	7	11	20
Endogenous	NOTCH1	NM_017617.3	146	146	142	177	231	131	29	242	374	9	124	74
Endogenous	NOTCH2	NM_024408.3	263	284	239	251	492	239	80	304	714	91	260	128
Endogenous	NOTCH3	NM_000435.2	209	126	163	147	407	221	138	592	355	120	312	282
Endogenous	NOTCH4	NM_004557.3	240	153	74	320	178	120	43	153	367	11	108	58
Endogenous	NPC1	NM_000271.3	113	108	258	113	659	150	29	224	777	22	150	49
Endogenous	NPHP4	NM_015102.3	72	18	32	48	58	31	10	67	90	5	34	29
Endogenous	NR1H2	NM_007121.4	40	28	58	35	72	59	27	69	95	15	82	36
Endogenous	NR1H3	NM_005693.2	68	93	44	40	125	56	33	96	123	54	95	62
Endogenous	NR1H4	NM_001206977.1	1	1	5	5	3	1	2	1	3	1	1	1
Endogenous	NRIP3	NM_020645.2	4	5	8	1	17	7	7	14	42	8	8	3
Endogenous	NRP2	NM_003872.2	224	175	279	205	1037	177	29	288	919	44	258	143
Endogenous	NUMB	NM_001005743.1	358	227	300	308	607	153	38	275	675	39	179	91
Endogenous	OAS1	NM_001032409.1	306	125	1208	1199	3360	189	82	416	356	16	206	95
Endogenous	OASL	NM_198213.1	20	27	184	73	747	8	3	42	38	1	9	6
Endogenous	OCLN	NM_002538.3	93	26	42	100	181	28	14	47	218	8	23	27
Endogenous	OGT	NM_181673.2	377	170	165	276	696	132	31	224	1143	83	150	77
Endogenous	OSBPL5	NM_020896.3	36	17	38	34	49	21	3	24	37	14	22	6
Endogenous	P2RY13	NM_176894.1	8	17	7	12	21	5	1	2	32	7	7	2
Endogenous	P3H3	NM_014262.4	19	14	69	141	141	26	15	156	115	39	58	37
Endogenous	P4HB	NM_000918.3	428	468	771	653	3620	386	175	1191	2693	107	551	356
Endogenous	PANX1	NM_015368.3	56	71	79	137	463	35	12	79	372	6	52	25
Endogenous	PARP1	NM_001618.3	101	113	101	181	322	88	33	151	256	11	91	51
Endogenous	PARP4	NM_006437.3	278	171	243	274	572	204	40	300	600	74	239	96
Endogenous	PC	NM_000920.3	18	15	10	19	43	13	4	44	53	22	21	13
Endogenous	PCCB	NM_000532.4	83	48	104	77	215	41	39	114	177	14	55	68
Endogenous	PCK1	NM_002591.2	2	1	3	2	8	1	2	5	4	2	1	1
Endogenous	PDE2A	NM_001143839.1	105	33	58	48	71	55	18	81	138	22	37	16
Endogenous	PDE3B	NM_000922.3	90	63	54	137	137	60	17	71	217	29	49	23
Endogenous	PDGFB	NM_033016.2	19	42	20	87	69	16	7	52	47	3	25	16
Endogenous	PDGFRB	NM_002609.3	669	264	610	508	1346	438	186	987	1288	221	505	358
Endogenous	PDHA1	NM_000284.3	72	40	176	107	265	54	33	113	181	9	88	52
Endogenous	PECAM1	NM_000442.3	2968	807	2655	2895	3067	1240	475	2332	2685	41	896	572
Endogenous	PELI1	NM_020651.3	489	212	375	165	2348	105	26	124	791	15	256	43
Endogenous	PELI2	NM_021255.2	64	23	36	37	87	29	17	34	94	6	41	14
Endogenous	PGM1	NM_001172818.1	65	79	77	67	263	24	18	121	315	28	44	43
Endogenous	PHLPP1	NM_194449.3	63	28	71	80	130	42	12	42	141	6	46	20
Endogenous	PHYKPL	NM_153373.3	61	42	30	29	48	52	24	67	140	32	53	41
Endogenous	PIDD1	NM_145886.2	20	20	17	9	45	35	8	39	55	40	42	35
Endogenous	PIK3C3	NM_002647.2	143	57	99	115	244	87	27	108	318	41	98	67
Endogenous	PIK3CA	NM_006218.2	181	106	113	109	337	111	21	119	327	59	93	35
Endogenous	PIK3CB	NM_006219.1	50	46	72	45	113	37	7	37	142	16	49	18
Endogenous	PIK3R4	NM_014602.1	116	39	110	125	227	39	16	85	188	7	56	38
Endogenous	PIK3R5	NM_001142633.1	110	160	93	61	441	137	11	108	243	31	157	14
Endogenous	PKHD1	NM_138694.3	2	6	1	1	6	1	1	3	5	1	4	2
Endogenous	PLCB2	NM_004573.2	75	29	22	24	48	7	16	26	51	4	49	14
Endogenous	PLCB3	NM_000932.2	30	14	36	25	59	15	14	62	59	14	28	23
Endogenous	PLCG1	NM_002660.2	273	70	169	191	263	90	46	183	294	26	106	92
Endogenous	PLCG2	NM_002661.2	149	89	67	72	133	40	43	59	163	11	85	31
Endogenous	PLG	NM_000301.3	6	5	1	7	8	2	2	1	4	2	3	1
Endogenous	PLIN4	NM_001080400.1	27	28	19	10	26	11	5	19	47	5	6	7
Endogenous	PLPP4	NM_001030059.1	1	3	2	7	9	3	4	13	25	50	11	15
Endogenous	PLTP	NM_006227.2	392	1175	686	703	2474	630	204	2517	3411	908	3447	214
Endogenous	PNOC	NM_001284244.1	9	9	2	3	7	10	9	5	12	3	11	1
Endogenous	PNPLA3	NM_025225.2	9	2	3	4	20	3	1	5	13	2	2	1
Endogenous	POSTN	NM_001135935.1	112	55	5	184	236	124	37	338	72	163	136	181
Endogenous	PPARA	NM_001001928.2	52	27	40	50	76	47	14	54	112	13	48	22
Endogenous	PPARD	NM_006238.4	17	26	37	26	98	14	3	41	59	14	30	20
Endogenous	PPARG	NM_005037.5	94	55	71	67	299	57	10	77	178	10	63	31
Endogenous	PPARGC1A	NM_013261.3	48	10	109	74	141	26	5	35	138	13	24	9
Endogenous	PPM1A	NM_021003.4	316	158	285	214	523	173	107	274	490	75	193	123
Endogenous	PPP2CA	NM_002715.2	274	217	372	393	1260	302	137	442	1003	32	328	150
Endogenous	PRAP1	NM_145202.4	3	1	3	2	4	5	1	4	5	2	3	3
Endogenous	PRDX1	NM_002574.2	1255	938	1530	1554	4565	2455	545	2452	2607	130	1972	982
Endogenous	PRDX6	NM_004905.2	314	304	524	280	1397	573	134	477	910	62	527	219
Endogenous	PREX1	NM_020820.3	125	139	164	132	146	132	45	104	137	13	148	27
Endogenous	PRF1	NM_005041.3	91	163	212	226	324	30	30	78	340	4	123	42
Endogenous	PRKAA1	NM_006251.5	249	100	248	224	569	143	56	216	447	6	140	65
Endogenous	PRKAB2	NM_005399.3	149	63	134	130	284	104	42	132	295	25	100	37
Endogenous	PRKACA	NM_002730.3	283	228	356	346	746	178	93	479	596	70	348	128
Endogenous	PRKACB	NM_182948.2	34	15	38	46	87	40	13	27	87	3	63	19
Endogenous	PRKAG1	NM_002733.3	50	21	67	75	123	26	18	57	124	4	26	26
Endogenous	PRKAG2	NM_016203.3	100	31	92	92	234	48	18	68	209	11	95	23
Endogenous	PRKCA	NM_002737.2	63	22	56	70	131	27	12	63	129	11	39	26
Endogenous	PRKDC	NM_006904.6	183	271	235	221	629	183	68	432	435	435	180	169
Endogenous	PRLR	NM_001204318.1	3	3	2	3	7	1	1	3	9	2	2	2
Endogenous	PROS1	NM_000313.1	230	109	112	249	375	191	76	269	509	45	194	85
Endogenous	PSEN2	NM_000447.2	41	21	69	39	90	22	10	41	84	5	36	28
Endogenous	PSENEN	NM_172341.1	117	88	127	97	321	81	40	161	374	50	134	80
Endogenous	PSMB1	NM_002793.2	99	43	168	127	553	85	50	144	269	11	68	26
Endogenous	PSMB7	NM_002799.2	261	110	332	326	1120	185	58	361	637	22	188	115
Endogenous	PSMB8	NM_004159.4	442	354	985	601	2567	219	163	593	981	31	409	263
Endogenous	PSMC3	NM_002804.4	4	11	11	15	49	6	3	24	30	1	12	9
Endogenous	PSMD13	NM_175932.2	162	51	240	194	575	80	30	178	379	7	101	55
Endogenous	PTAFR	NM_000952.3	46	142	51	52	282	114	17	128	171	22	184	30
Endogenous	PTCH1	NM_000264.4	70	17	46	31	81	35	15	33	51	11	35	33
Endogenous	PTGER4	NM_000958.2	131	127	91	81	355	61	40	72	275	52	101	43
Endogenous	PTGS2	NM_000963.1	39	137	50	38	801	9	4	41	740	22	25	23
Endogenous	PTK2	NM_005607.4	300	107	221	303	580	108	53	262	483	34	115	105
Endogenous	PTK2B	NM_004103.3	291	176	222	106	534	87	25	157	505	55	243	50
Endogenous	PTPA	NM_021131.4	73	73	134	112	327	80	34	165	242	11	136	75
Endogenous	PTPN1	NM_002827.3	256	152	240	249	1178	123	64	240	1043	13	177	82
Endogenous	PTPN11	NM_002834.3	299	137	255	250	682	237	84	300	625	35	194	120
Endogenous	PTPN12	NM_002835.3	281	159	389	367	892	136	50	204	812	4	145	83
Endogenous	PTPN6	NM_002831.5	145	108	127	50	324	75	36	115	231	8	135	44
Endogenous	PTPRC	NM_080923.2	230	177	169	124	331	86	42	83	351	12	137	31
Endogenous	PYGM	NM_001164716.1	15	9	19	14	18	8	9	19	36	1	12	12
Endogenous	RAB7B	NM_001164522.1	18	8	10	40	69	28	11	47	81	23	69	46
Endogenous	RAC1	NM_006908.4	992	809	1381	1149	3290	708	220	1175	2261	165	900	501
Endogenous	RAC2	NM_002872.4	148	281	138	67	196	37	39	79	134	14	70	71
Endogenous	RAC3	NM_005052.2	15	14	12	11	19	24	8	52	40	64	17	23
Endogenous	RAP1B	NM_001010942.2	817	569	1013	962	2993	484	235	968	2295	58	582	263
Endogenous	RAPGEF1	NM_005312.2	395	207	342	364	841	230	71	414	750	49	337	111
Endogenous	RAPGEF2	NM_014247.2	92	68	70	66	265	52	21	102	203	20	63	34
Endogenous	RASGRP4	NM_170604.1	76	130	81	32	67	17	19	59	79	33	40	19
Endogenous	RBX1	NM_014248.2	461	242	726	714	1809	253	192	548	767	51	394	281
Endogenous	RELA	NM_021975.3	129	177	130	105	576	107	26	153	348	102	124	63
Endogenous	RELB	NM_006509.3	26	61	55	60	305	27	12	70	184	9	32	34
Endogenous	RELN	NM_005045.2	24	8	13	26	34	10	1	26	29	2	11	6
Endogenous	RETN	NM_020415.2	11	29	71	21	33	4	7	16	21	3	15	6
Endogenous	RGS7	NM_002924.2	3	2	1	2	5	2	6	4	4	2	1	1
Endogenous	RHO	NM_000539.2	2	2	5	3	5	4	1	4	8	1	1	1
Endogenous	RIPK3	NM_006871.3	38	22	38	39	74	33	11	63	81	2	32	16
Endogenous	RNF111	NM_017610.6	186	85	155	139	301	109	36	197	426	25	132	75
Endogenous	RNF152	NM_173557.2	120	19	167	68	171	89	30	115	205	45	65	48
Endogenous	ROCK2	NM_004850.3	390	228	426	342	651	270	90	370	591	118	268	184
Endogenous	RORA	NM_134261.2	83	39	129	64	260	70	26	41	158	16	72	30
Endogenous	RPS27A	NM_002954.5	3866	2845	3050	2639	11334	4033	1193	4604	10747	1832	4172	1810
Endogenous	RPS6KA2	NM_021135.4	99	65	59	52	122	85	14	65	102	33	49	39
Endogenous	RPS6KB2	NM_003952.2	67	45	54	31	123	40	19	102	120	49	64	31
Endogenous	S100A12	NM_005621.1	1363	1843	754	360	412	246	22	229	472	76	164	27
Endogenous	S100A4	NM_002961.2	1018	1221	567	1124	1990	450	317	1671	1282	219	1090	955
Endogenous	SAA1	NM_199161.1	722	2224	3776	39	1434	78	27	274	2556	369	74	54
Endogenous	SCD	NM_005063.4	36	61	209	76	992	150	95	284	1630	19	310	260
Endogenous	SCIN	NM_033128.3	17	6	19	24	121	13	9	39	154	3	28	24
Endogenous	SDC3	NM_014654.3	94	123	114	207	523	160	80	354	319	110	463	202
Endogenous	SEC24C	NM_004922.2	288	253	312	294	605	248	81	448	781	184	252	224
Endogenous	SEC61B	NM_006808.2	389	288	632	683	2812	308	154	802	2375	25	426	247
Endogenous	SEH1L	NM_001013437.1	108	49	168	122	512	58	45	131	335	4	94	67
Endogenous	SELENOS	NM_203472.1	21	16	19	12	53	27	17	39	76	9	38	18
Endogenous	SEM1	NM_001201451.1	1	1	3	1	6	1	1	1	4	1	3	2
Endogenous	SERPINE1	NM_000602.2	266	1470	1101	2062	12675	573	85	2405	11851	58	579	194
Endogenous	SERPINF1	NM_002615.4	868	847	939	1845	3316	820	265	1171	2634	323	961	413
Endogenous	SERPING1	NM_000062.2	3039	1339	4744	2841	7244	2167	553	1952	4539	215	2340	755
Endogenous	SERPINH1	NM_001235.2	442	1786	1322	3894	5872	1346	363	3387	8081	474	857	1339
Endogenous	SH2D1A	NM_002351.4	20	5	8	11	15	12	4	11	34	1	20	11
Endogenous	SIGLEC5	NM_003830.3	40	299	52	20	31	30	13	17	40	86	45	7
Endogenous	SIL1	NM_001037633.1	108	54	181	187	620	86	54	167	327	9	132	57
Endogenous	SIRT1	NM_012238.4	117	67	63	83	140	74	15	59	281	11	87	32
Endogenous	SKI	NM_003036.2	295	233	265	312	508	299	111	335	721	91	311	187
Endogenous	SKP1	NM_170679.2	1041	611	1035	1211	3637	956	407	1428	2812	236	837	539
Endogenous	SKP2	NM_005983.2	81	38	57	72	88	50	18	74	122	14	55	47
Endogenous	SLC25A10	NM_012140.3	17	12	15	15	43	13	3	42	35	10	23	17
Endogenous	SLC25A13	NM_001160210.1	53	37	111	56	157	43	16	71	164	8	47	28
Endogenous	SLC2A2	NM_000340.1	1	3	1	1	7	1	1	4	3	3	2	1
Endogenous	SLC37A4	NM_001164277.1	43	23	32	36	70	28	10	46	61	13	37	21
Endogenous	SMAD2	NM_001003652.3	396	148	270	297	799	198	62	326	807	18	212	130
Endogenous	SMAD3	NM_005902.3	132	103	122	133	672	108	48	179	464	20	128	68
Endogenous	SMAD4	NM_005359.3	341	155	242	271	538	293	94	268	709	83	250	153
Endogenous	SMAD6	NR_027654.1	218	126	113	244	76	138	46	189	68	8	131	61
Endogenous	SMARCC2	NM_001130420.1	366	91	154	210	427	134	51	173	395	6	141	70
Endogenous	SMURF1	NM_181349.1	70	29	50	58	275	23	9	73	182	12	27	29
Endogenous	SNAI2	NM_003068.3	67	52	71	276	236	95	21	233	142	13	94	75
Endogenous	SOD1	NM_000454.4	106	50	69	85	179	76	42	84	116	37	61	55
Endogenous	SORBS1	NM_001034956.1	203	81	205	119	320	137	83	125	180	13	103	61
Endogenous	SOS1	NM_005633.2	176	145	136	198	229	161	54	140	381	42	184	95
Endogenous	SP1	NM_003109.1	142	84	66	76	284	90	16	85	263	25	107	50
Endogenous	SP3	NM_003111.3	433	146	439	424	1041	226	96	379	842	3	335	99
Endogenous	SPIB	NM_003121.3	7	2	1	3	8	1	5	2	7	1	1	1
Endogenous	SPOP	NM_001007226.1	85	52	92	115	244	60	28	72	145	8	65	33
Endogenous	SPOPL	NM_001001664.1	277	112	172	167	349	109	19	106	412	10	112	49
Endogenous	SPP1	NM_000582.2	49	1081	20	303	1350	25	16	349	938	65	383	71
Endogenous	SRC	NM_005417.3	91	62	148	88	363	83	39	132	229	6	121	51
Endogenous	SREBF1	NM_001005291.1	206	56	245	153	539	84	51	280	718	21	260	145
Endogenous	SSR2	NM_003145.3	243	200	278	299	1140	177	69	391	1181	29	231	152
Endogenous	SSR4	NM_006280.1	354	297	473	413	1779	277	112	535	1537	102	490	191
Endogenous	STAT1	NM_139266.1	679	246	3196	1154	8441	174	125	1102	1929	32	578	362
Endogenous	STAT3	NM_003150.3	809	820	2026	1115	3458	695	295	1165	2207	102	926	467
Endogenous	STAT5A	NM_003152.2	77	87	107	50	268	69	29	74	203	10	87	17
Endogenous	STAT5B	NM_012448.3	154	63	161	119	207	79	41	101	287	10	73	30
Endogenous	STK4	NR_147975.1	243	107	189	140	237	110	51	129	383	14	146	45
Endogenous	SUFU	NM_001178133.1	70	37	59	98	159	55	30	117	159	4	123	51
Endogenous	SUGT1	NM_001130912.1	119	83	70	158	276	166	38	146	360	19	98	45
Endogenous	SYK	NM_003177.5	96	138	85	51	160	89	28	120	162	15	165	31
Endogenous	TBC1D4	NM_014832.2	87	11	39	61	138	15	10	55	143	5	35	19
Endogenous	TBL1XR1	NM_024665.4	276	103	205	249	646	195	80	271	598	9	228	112
Endogenous	TBX21	NM_013351.1	36	16	22	28	40	12	14	14	47	4	18	19
Endogenous	TCF7L1	NM_031283.1	54	25	59	47	161	23	9	56	101	6	34	25
Endogenous	TCF7L2	NM_001146274.1	204	65	156	154	403	59	57	127	263	21	91	86
Endogenous	TCL1A	NR_049726.1	5	3	4	3	7	3	3	3	1	4	2	2
Endogenous	TEK	NM_000459.3	138	91	153	306	261	69	19	110	180	3	46	21
Endogenous	TGFB1	NM_000660.3	405	828	468	375	1054	474	122	796	1062	824	610	347
Endogenous	TGFB1I1	NM_001042454.1	344	145	635	390	977	201	96	627	587	54	238	239
Endogenous	TGFBR1	NM_004612.2	152	100	193	122	388	95	39	170	464	15	119	62
Endogenous	TGFBR2	NM_001024847.1	956	775	677	1630	1496	541	217	705	1479	147	545	305
Endogenous	THBS1	NM_003246.2	2141	3206	3344	3126	28168	1814	473	4619	19036	1051	4112	818
Endogenous	THBS2	NM_003247.2	76	71	206	855	1155	171	87	544	1371	34	391	196
Endogenous	THBS3	NM_001252607.1	97	42	80	134	206	46	30	196	189	50	72	84
Endogenous	TIMP1	NM_003254.2	1265	4175	9732	10234	32006	1322	1271	15864	12529	118	3080	2131
Endogenous	TIMP2	NM_003255.4	1020	576	869	759	1821	1178	344	1060	1732	615	1437	666
Endogenous	TJP1	NM_003257.3	351	68	250	321	613	150	52	171	464	5	136	68
Endogenous	TJP2	NM_004817.2	93	63	157	138	375	50	22	60	188	11	65	31
Endogenous	TLN1	NM_006289.3	1638	900	1620	1477	3415	1132	428	1890	2601	123	1387	621
Endogenous	TLR1	NM_003263.3	107	173	116	86	295	66	17	90	265	13	117	23
Endogenous	TLR2	NM_003264.3	370	739	487	154	1657	105	14	227	654	135	284	30
Endogenous	TLR4	NM_138554.2	198	158	97	158	213	316	42	171	383	12	343	34
Endogenous	TLR6	NM_006068.2	29	31	12	15	25	18	5	25	74	2	36	4
Endogenous	TLR8	NM_016610.2	21	108	34	23	101	18	4	21	100	4	46	4
Endogenous	TM6SF2	NM_001001524.2	5	5	5	6	18	2	3	12	9	8	12	8
Endogenous	TNF	NM_000594.2	6	27	9	5	71	6	4	15	30	4	18	3
Endogenous	TNFRSF17	NM_001192.2	17	26	9	15	19	16	11	24	29	7	21	9
Endogenous	TNFSF10	NM_003810.2	549	353	694	955	1725	221	189	523	926	84	202	268
Endogenous	TNFSF14	NM_003807.3	29	139	23	39	39	11	12	14	110	27	10	22
Endogenous	TNN	NM_022093.1	4	4	3	2	1	1	1	2	7	3	4	7
Endogenous	TPR	NM_003292.2	122	49	108	132	249	86	36	116	277	9	97	46
Endogenous	TPSAB1/B2	NM_003294.3	756	416	664	1310	3985	884	108	1648	1474	162	1164	591
Endogenous	TRADD	NM_003789.2	51	57	55	47	102	46	32	63	92	48	65	49
Endogenous	TRAF2	NM_021138.3	50	72	72	79	208	98	18	75	147	11	44	39
Endogenous	TRAF6	NM_145803.2	116	47	91	86	250	84	15	68	196	20	49	37
Endogenous	TRAT1	NM_016388.2	18	15	29	9	60	23	6	9	52	12	24	5
Endogenous	TRIB3	NM_021158.3	11	11	31	20	85	16	9	36	190	2	15	11
Endogenous	TRRAP	NM_003496.2	267	173	162	185	240	148	67	230	436	75	210	127
Endogenous	TTN	NM_133432.1	66	8	21	8	69	22	17	27	73	6	37	36
Endogenous	TXN	NM_003329.2	594	438	1388	846	5335	1786	245	1341	2568	102	1422	410
Endogenous	TXN2	NM_012473.3	165	73	185	196	440	120	39	188	356	10	141	74
Endogenous	TXNDC5	NM_030810.2	452	606	268	379	1286	349	165	933	1217	566	618	382
Endogenous	UBA52	NM_003333.3	1303	673	778	777	4675	1156	290	1351	3680	289	987	520
Endogenous	UBE2D2	NM_181838.1	182	99	190	251	560	118	44	175	476	31	121	76
Endogenous	UBE2N	NM_003348.3	48	27	39	63	218	28	8	57	114	8	29	27
Endogenous	UBE4B	NM_006048.4	160	69	147	126	261	110	38	118	295	13	130	47
Endogenous	UQCRB	NM_006294.3	16	4	7	9	17	5	3	9	11	2	2	1
Endogenous	UQCRFS1	NM_006003.2	106	106	193	170	681	135	49	239	507	23	137	95
Endogenous	UQCRH	NM_006004.2	352	396	320	286	1359	523	141	598	1111	306	418	301
Endogenous	VAMP8	NM_003761.4	137	93	159	100	294	141	73	195	259	79	268	151
Endogenous	VAV1	NM_005428.2	64	74	32	36	69	17	10	34	62	3	32	10
Endogenous	VCAM1	NM_001078.3	54	73	58	230	1043	17	17	199	100	16	50	50
Endogenous	VEGFA	NM_001025366.1	365	361	512	643	1606	171	85	662	2499	33	313	163
Endogenous	VEGFB	NM_003377.3	144	75	152	107	346	138	32	138	285	20	183	74
Endogenous	VIM	NM_003380.2	5131	2796	2859	5080	13416	3591	1219	7442	12632	1020	3724	2992
Endogenous	WAS	NM_000377.2	271	191	154	131	258	92	42	161	323	21	215	36
Endogenous	WWC1	NM_001161662.1	105	97	150	41	235	51	20	106	289	25	52	39
Endogenous	XAF1	NM_199139.2	354	146	773	718	1157	52	79	300	209	72	122	155
Endogenous	XBP1	NM_005080.2	529	854	565	405	1328	596	269	633	1614	854	705	433
Endogenous	XCL1/2	NM_003175.3	5	2	2	12	29	4	5	1	13	3	3	2
Endogenous	XIAP	NM_001167.3	159	91	234	223	518	164	59	231	591	1	142	95
Endogenous	YWHAB	NM_003404.4	605	653	547	625	1687	526	167	940	1258	534	475	392
Endogenous	YWHAE	NM_006761.4	508	250	709	811	2762	360	167	662	1418	15	396	247
Endogenous	YWHAG	NM_012479.3	307	407	542	745	2108	541	163	653	1550	7	528	241
Endogenous	YWHAQ	NM_006826.2	442	271	440	545	2364	492	148	681	1420	57	412	276
Endogenous	ZFYVE16	NM_001105251.2	131	75	159	172	316	55	29	173	446	3	116	40
Housekeeping	ACAD9	NM_014049.4	92	66	125	112	222	84	38	138	230	25	114	44
Housekeeping	ARMH3	NM_024541.2	209	78	128	114	212	82	59	158	285	26	107	67
Housekeeping	CNOT10	NM_001256741.1	68	28	58	66	127	34	7	53	153	6	40	20
Housekeeping	GUSB	NM_000181.3	306	172	291	285	656	336	68	331	655	113	383	169
Housekeeping	MTMR14	NM_022485.3	176	70	103	58	238	99	30	126	289	17	110	36
Housekeeping	NOL7	NM_016167.3	176	95	162	241	600	117	34	192	478	6	137	69
Housekeeping	NUBP1	NM_002484.3	80	65	92	76	234	62	21	99	210	25	79	60
Housekeeping	PGK1	NM_000291.2	663	1588	1121	1037	2522	886	375	1358	4255	409	966	550
Housekeeping	PPIA	NM_021130.3	2055	1816	2632	3269	11414	1842	616	4381	4977	457	2481	1693
Housekeeping	RPLP0	NM_001002.3	3377	2379	3441	2085	9685	2830	1041	3787	7995	773	3932	1777

## Sheet: Downsizing_Cartridge_Ergebnisse
File Name			20211019_FIBROSR Panel Downsizing Lungen_02 EX16 20926 2_02.RCC	20211019_FIBROSR Panel Downsizing Lungen_03 EX16 26961 4_03.RCC	20211019_FIBROSR Panel Downsizing Lungen_04 EX17 11580 ll2_04.RCC	20211019_FIBROSR Panel Downsizing Lungen_05 H18 27505 lll3_05.RCC	20211019_FIBROSR Panel Downsizing Lungen_06 H19 12402 lllNE6_06.RCC	20211019_FIBROSR Panel Downsizing Lungen_07 H19 20674 lll25_07.RCC	20211019_FIBROSR Panel Downsizing Lungen_08 H19 32157 4_08.RCC	20211019_FIBROSR Panel Downsizing Lungen_09 H20 19571 6_09.RCC	20211019_FIBROSR Panel Downsizing Lungen_10 H21 2146 5_10.RCC	20211019_FIBROSR Panel Downsizing Lungen_11 H21 7664 lll25_11.RCC	20211019_FIBROSR Panel Downsizing Lungen_12 H21 18718 1_12.RCC
Description			Control	Control	Control	Control	Control	Control	Control	Control	Control	Control	Control
Sample ID			02 EX16 20926 2	03 EX16 26961 4	04 EX17 11580 ll2	05 H18 27505 lll3	06 H19 12402 lllNE6	07 H19 20674 lll25	08 H19 32157 4	09 H20 19571 6	10 H21 2146 5	11 H21 7664 lll25	12 H21 18718 1
Owner
Sample Date			10/19/2021	10/19/2021	10/19/2021	10/19/2021	10/19/2021	10/19/2021	10/19/2021	10/19/2021	10/19/2021	10/19/2021	10/19/2021
File Version			1.7	1.7	1.7	1.7	1.7	1.7	1.7	1.7	1.7	1.7	1.7
Gene RLF			NS_HS_FIBROSIS_V2.0	NS_HS_FIBROSIS_V2.0	NS_HS_FIBROSIS_V2.0	NS_HS_FIBROSIS_V2.0	NS_HS_FIBROSIS_V2.0	NS_HS_FIBROSIS_V2.0	NS_HS_FIBROSIS_V2.0	NS_HS_FIBROSIS_V2.0	NS_HS_FIBROSIS_V2.0	NS_HS_FIBROSIS_V2.0	NS_HS_FIBROSIS_V2.0
Comments
Lane ID			2	3	4	5	6	7	8	9	10	11	12
FOV Count			555	555	555	555	555	555	555	555	555	555	555
FOV Counted			541	547	534	543	475	540	537	538	542	527	526
Scanner ID			1309C0112	1309C0112	1309C0112	1309C0112	1309C0112	1309C0112	1309C0112	1309C0112	1309C0112	1309C0112	1309C0112
Stage Position			2	2	2	2	2	2	2	2	2	2	2
Binding Density			0.29	0.34	0.52	0.28	0.4	0.6	0.47	0.53	0.63	0.75	1.04
Messages
Positive	POS_A	ERCC_00117.1	24421	29097	33561	36573	28128	30462	33987	31880	27704	28226	25695
Positive	POS_B	ERCC_00112.1	6492	8089	9654	10242	7924	8332	9254	9193	7850	7883	7179
Positive	POS_C	ERCC_00002.1	2020	2184	2720	2880	2257	2426	2722	2693	2271	2210	2075
Positive	POS_D	ERCC_00092.1	530	491	628	689	514	540	668	652	528	548	519
Positive	POS_E	ERCC_00035.1	62	80	103	116	92	97	106	105	89	83	97
Positive	POS_F	ERCC_00034.1	37	36	44	51	38	50	52	61	33	44	35
Negative	NEG_A	ERCC_00096.1	4	13	5	10	8	8	10	14	10	9	11
Negative	NEG_B	ERCC_00041.1	4	6	7	6	6	10	10	4	10	8	17
Negative	NEG_C	ERCC_00019.1	6	10	13	9	8	14	17	11	16	24	10
Negative	NEG_D	ERCC_00076.1	3	4	6	6	5	8	6	9	8	9	12
Negative	NEG_E	ERCC_00098.1	4	13	16	15	14	7	7	5	8	10	11
Negative	NEG_F	ERCC_00126.1	11	13	13	15	17	21	15	15	19	17	19
Negative	NEG_G	ERCC_00144.1	2	6	1	4	3	5	4	1	3	5	6
Negative	NEG_H	ERCC_00154.1	4	10	5	9	4	5	11	4	8	7	10
Endogenous	ABCA1	NM_005502.3	544	1109	1357	656	2197	686	1401	1164	1666	1230	2913
Endogenous	ABCB11	NM_003742.2	8	11	7	5	4	10	13	6	7	6	13
Endogenous	ACAA2	NM_006111.2	331	448	503	422	297	628	692	430	638	532	697
Endogenous	ACACA	NM_198834.1	59	117	276	37	95	199	116	136	230	288	318
Endogenous	ACACB	NM_001093.3	310	95	190	93	192	329	256	560	455	533	266
Endogenous	ACOX2	NM_003500.3	34	11	42	5	24	39	22	39	23	50	27
Endogenous	ACSL4	NM_004458.2	203	396	724	146	492	863	379	387	777	843	1636
Endogenous	ACSM3	NM_005622.3	30	138	401	136	99	316	195	166	239	210	148
Endogenous	ACTA2	NM_001613.1	28511	1221	6251	2082	2943	7759	3964	4968	4805	2034	9110
Endogenous	ACTR1A	NM_005736.3	757	583	1226	346	522	1521	832	1212	1731	1935	2017
Endogenous	ACVRL1	NM_000020.1	151	595	2016	159	730	2356	639	3211	2253	3755	2829
Endogenous	ADA2	NM_001282229.1	178	455	521	297	234	464	548	559	671	481	567
Endogenous	ADAM17	NM_003183.4	354	679	1332	695	1068	1272	1661	1109	1543	1952	2181
Endogenous	ADAM9	NM_001005845.1	463	832	1520	424	728	1543	814	1416	1237	1216	1800
Endogenous	ADCY7	NM_001114.4	82	323	388	179	166	289	357	251	526	331	310
Endogenous	ADH1B	NM_000668.4	6056	1758	6374	1442	6429	13156	4680	12033	12973	13731	5494
Endogenous	ADH1C	NM_000669.3	32	8	147	23	149	54	37	51	159	100	37
Endogenous	ADH4	NM_000670.3	71	5	11	5	6	10	6	10	16	19	12
Endogenous	ADH6	NM_000672.3	4	7	5	7	6	14	8	7	3	40	10
Endogenous	ADIPOQ	NM_004797.2	7	3	7	7	5	12	9	5	7	6	4
Endogenous	ADIPOR1	NM_015999.3	55	207	197	130	101	270	194	231	272	228	213
Endogenous	ADPGK	NR_023318.1	189	503	854	200	379	966	510	716	957	1049	1237
Endogenous	AIM2	NM_004833.1	14	58	40	27	42	16	24	66	61	60	48
Endogenous	AKR1B10	NM_020299.3	14	3	12	2	2	3	8	2	9	7	12
Endogenous	AKT1	NM_001014432.1	495	821	1310	658	748	1462	1201	1147	1352	1426	1383
Endogenous	ALAD	NM_000031.5	77	77	125	68	59	141	146	172	165	137	142
Endogenous	ALDH3A2	NM_001031806.1	669	576	1347	418	791	1387	958	1232	1570	1908	2103
Endogenous	ALDH7A1	NM_001182.3	181	38	84	19	82	83	82	239	205	172	157
Endogenous	ALDH9A1	NM_000696.3	594	735	965	485	475	1083	872	973	1228	1091	1394
Endogenous	ALDOB	NM_000035.3	4	5	4	6	5	6	6	13	13	8	6
Endogenous	AMOTL1	NM_001301007.1	610	305	840	198	363	1042	447	1105	1392	1332	1326
Endogenous	AMOTL2	NM_016201.2	301	126	405	227	512	880	553	901	983	1333	482
Endogenous	ANAPC1	NM_022662.2	154	134	176	48	92	295	143	251	251	428	333
Endogenous	ANAPC10	NM_001256710.1	82	43	130	25	50	144	54	182	169	223	313
Endogenous	ANAPC7	NM_016238.2	110	109	222	46	76	226	118	186	167	220	262
Endogenous	ANGPTL4	NR_104213.1	117	117	196	52	386	844	156	299	58	145	1652
Endogenous	AP1G1	NM_001030007.1	331	389	806	142	423	979	412	897	972	1194	1454
Endogenous	AP1S1	NM_001283.3	137	344	412	186	212	527	408	437	413	474	711
Endogenous	AP2S1	NM_021575.2	454	1185	1299	1051	607	1746	1432	842	1179	985	1559
Endogenous	APC	NM_000038.3	103	84	160	45	72	224	118	189	220	247	172
Endogenous	APCS	NM_001639.3	5	12	13	11	3	10	11	11	8	5	13
Endogenous	APLP2	NM_001243299.1	2502	2911	5167	1971	3170	5956	4686	6127	8587	9255	8299
Endogenous	APOA1	NM_000039.1	2	11	23	9	11	31	26	44	35	19	10
Endogenous	APOA2	NM_001643.1	2	6	3	3	7	7	1	6	9	6	10
Endogenous	APOA4	NM_000482.3	5	9	1	1	2	4	9	4	4	7	6
Endogenous	APOB	NM_000384.2	94	13	9	4	6	12	10	12	15	14	14
Endogenous	APOC2	NM_000483.3	4	11	18	21	13	27	61	23	6	20	64
Endogenous	APOC3	NM_000040.1	2	9	15	3	3	7	5	7	10	11	14
Endogenous	APOH	NM_000042.2	5	12	51	3	40	46	41	56	102	110	51
Endogenous	APP	NM_000484.3	3659	2396	6928	1693	3391	8228	3754	10495	10633	9855	10258
Endogenous	AQP8	NM_001169.2	3	6	9	6	3	9	7	17	7	9	12
Endogenous	ARG1	NM_000045.3	24	17	60	32	39	147	78	45	370	414	108
Endogenous	ARHGAP35	NM_004491.4	570	362	788	156	341	985	496	802	1258	1462	1062
Endogenous	ARHGEF2	NM_004723.2	621	861	1535	688	1055	1381	1639	1232	1939	1654	1287
Endogenous	ARHGEF6	NM_004840.2	353	243	691	145	406	853	356	1208	1315	2081	969
Endogenous	ARRB1	NM_004041.3	228	1247	2080	1049	990	2327	1961	2945	3809	2946	1544
Endogenous	ATF4	NM_001675.2	3409	2746	6747	2623	4532	8292	6098	7480	9336	11891	9542
Endogenous	ATF7IP	NM_018179.3	446	285	628	145	363	657	363	847	739	924	574
Endogenous	ATG101	NM_021934.4	221	220	413	184	345	529	378	735	463	615	743
Endogenous	ATG2B	NM_018036.5	199	114	324	37	175	408	129	473	424	607	546
Endogenous	ATOX1	NM_004045.3	324	907	661	304	289	961	476	662	661	761	964
Endogenous	ATP6V1E1	NM_001039367.1	1756	1198	2016	497	1041	2665	1230	2425	2763	3488	3049
Endogenous	ATP6V1F	NM_001198909.1	1192	2255	3283	1649	1667	3236	3192	2288	3066	2837	3650
Endogenous	ATP6V1G2	NM_130463.2	17	9	15	15	22	22	24	24	40	29	21
Endogenous	ATP7A	NM_000052.4	93	110	201	113	135	168	239	184	253	244	214
Endogenous	AXL	NM_021913.2	689	248	654	335	738	1166	782	1114	1371	1141	1473
Endogenous	BANF1	NM_001143985.1	557	607	742	525	370	928	943	577	1010	821	1199
Endogenous	BAX	NM_138761.3	355	1229	1575	1158	771	1499	1616	1094	1638	1469	2012
Endogenous	BCAP31	NM_001139457.1	449	851	1112	718	560	1509	1359	1242	1610	1578	2018
Endogenous	BCL2	NM_000657.2	359	187	293	348	310	278	471	407	437	348	302
Endogenous	BCL2L1	NM_138578.1	464	877	1628	635	1197	2088	1241	2302	2216	2801	2634
Endogenous	BIRC3	NM_182962.1	37	202	175	134	86	110	329	240	215	200	394
Endogenous	BLK	NM_001715.2	2	15	8	25	19	19	44	23	41	46	29
Endogenous	BMP10	NM_014482.1	3	2	4	2	2	8	8	2	3	8	4
Endogenous	BPI	NM_001725.2	25	10	50	5	12	60	23	24	14	23	62
Endogenous	BRAF	NM_004333.3	286	232	511	146	393	598	384	630	661	836	852
Endogenous	BRPF3	NM_015695.2	93	68	140	27	73	195	67	160	184	224	218
Endogenous	BST2	NM_004335.2	1763	1618	2187	746	1141	2313	1684	2405	2129	1720	2444
Endogenous	C1S	NM_001734.2	2540	1036	1982	622	1675	2569	1035	3820	2329	2987	3874
Endogenous	C3	NM_000064.2	1535	1667	2126	609	1135	1660	1520	2391	3202	2478	6846
Endogenous	C3AR1	NM_004054.2	171	579	625	404	505	421	559	484	671	431	552
Endogenous	C4BPA	NM_000715.3	2	314	487	342	958	2275	754	366	862	923	1169
Endogenous	C5	NM_001735.2	44	179	161	68	154	356	141	171	222	368	312
Endogenous	C6	NM_000065.2	252	49	52	13	80	46	48	123	124	48	172
Endogenous	C8A	NM_000562.2	10	8	8	6	7	13	17	12	14	6	11
Endogenous	C8B	NM_000066.2	2	5	29	6	6	32	13	57	11	46	23
Endogenous	C9	NM_001737.3	4	1	10	9	13	9	13	25	15	11	7
Endogenous	CALM1	NM_006888.3	844	225	768	97	306	802	339	894	1016	1220	1251
Endogenous	CAPN5	NM_004055.4	71	103	112	121	72	51	83	61	66	57	159
Endogenous	CARD9	NM_052814.3	17	133	95	106	63	129	175	116	169	89	130
Endogenous	CASP12	NR_034061.1	11	9	19	11	6	16	14	20	21	18	19
Endogenous	CASP3	NM_004346.3	183	368	458	184	241	458	259	441	441	483	713
Endogenous	CASP4	NM_001225.3	250	718	1186	595	896	986	1263	802	1351	1457	1505
Endogenous	CASP6	NM_032992.2	59	202	290	150	134	300	265	201	257	296	274
Endogenous	CASP7	NM_001227.3	67	147	240	59	126	300	165	315	321	472	568
Endogenous	CASP8	NM_001228.4	120	384	550	264	492	627	622	624	1167	1058	703
Endogenous	CAT	NM_001752.2	620	955	2239	624	803	3569	1919	2062	3395	3114	3134
Endogenous	CBL	NM_005188.2	258	450	572	684	391	429	688	516	682	546	558
Endogenous	CCL13	NM_005408.2	120	1196	704	278	102	395	225	81	232	250	225
Endogenous	CCL19	NM_006274.2	261	468	219	784	68	27	379	219	80	72	732
Endogenous	CCL2	NM_002982.3	672	700	1380	199	1704	1745	1077	226	356	745	3360
Endogenous	CCL4	NM_002984.2	87	349	376	83	202	394	354	721	387	847	748
Endogenous	CCN2	NM_001901.2	6957	909	4562	1607	6039	8279	6115	14307	13364	16865	12355
Endogenous	CCNA2	NM_001237.2	22	166	104	72	44	112	69	58	67	49	96
Endogenous	CCR1	NM_001295.2	121	544	485	191	153	545	384	178	396	324	617
Endogenous	CCR2	NM_001123041.2	5	126	164	119	76	121	185	134	406	207	111
Endogenous	CCR4	NM_005508.4	8	49	87	63	99	47	64	149	65	178	97
Endogenous	CCR7	NM_001838.2	7	44	28	117	45	18	31	19	26	22	32
Endogenous	CCS	NM_005125.1	336	567	538	478	380	474	605	605	592	474	553
Endogenous	CD14	NM_000591.2	1232	2917	3605	2558	1405	2688	3888	2036	3573	1760	2869
Endogenous	CD163	NM_004244.4	1081	8650	3628	3852	2953	6239	5777	3130	4747	4101	7481
Endogenous	CD180	NM_005582.2	15	145	102	114	74	92	314	61	65	61	85
Endogenous	CD19	XM_011545981.1	2	18	13	19	10	12	19	10	13	12	6
Endogenous	CD209	NM_001144899.1	141	315	218	189	94	85	210	61	99	85	309
Endogenous	CD244	NM_001166663.1	4	11	11	10	4	1	10	3	26	1	12
Endogenous	CD34	NM_001025109.1	197	118	272	122	205	297	586	243	523	300	340
Endogenous	CD36	NM_000072.3	2663	1680	2837	720	1286	5030	2273	2236	3139	3246	4089
Endogenous	CD3D	NM_000732.4	10	137	172	159	162	70	185	206	248	234	136
Endogenous	CD3E	NM_000733.2	13	93	172	151	198	82	195	230	243	274	132
Endogenous	CD3G	NM_000073.2	4	34	62	52	63	21	59	91	98	54	40
Endogenous	CD4	NM_000616.4	92	484	553	418	272	428	593	598	690	488	697
Endogenous	CD44	NM_001001392.1	1107	6132	5753	5788	4738	4826	11150	3446	5303	3958	8447
Endogenous	CD6	NM_001254751.1	9	28	81	58	90	26	80	67	116	134	31
Endogenous	CD68	NM_001251.2	578	4846	4116	4026	1965	4418	7642	1427	4180	2753	4321
Endogenous	CD84	NM_001184879.1	64	508	374	295	259	326	377	254	305	375	336
Endogenous	CD86	NM_175862.3	40	148	159	59	99	129	137	92	179	147	398
Endogenous	CD8A	NM_001768.5	13	71	168	195	175	76	336	279	257	181	117
Endogenous	CD8B	NM_172099.2	6	19	28	32	29	29	45	43	27	40	22
Endogenous	CDH2	NM_001792.3	801	3	19	10	13	27	14	13	37	14	47
Endogenous	CDH5	NM_001795.3	186	460	1247	245	836	1650	1159	2264	2353	2497	2510
Endogenous	CDK4	NM_000075.2	198	235	379	135	175	480	235	282	398	480	534
Endogenous	CDKN1A	NM_000389.2	1065	695	808	1052	3137	1444	2295	2953	1747	3019	7453
Endogenous	CDKN2C	NM_001262.2	164	111	192	190	134	176	158	190	214	130	140
Endogenous	CDON	NM_016952.4	77	21	81	22	54	69	47	50	97	99	339
Endogenous	CEACAM3	NM_001815.3	2	96	27	26	15	10	39	9	28	28	21
Endogenous	CEBPA	NM_004364.2	45	392	753	188	314	846	668	482	1249	877	999
Endogenous	CETP	NM_000078.2	9	26	78	8	27	31	20	85	27	42	153
Endogenous	CFH	NM_001014975.2	2340	631	1677	371	1140	1507	593	2141	1711	1444	3509
Endogenous	CFHR1	NM_002113.2	7	11	14	8	9	14	19	10	10	9	17
Endogenous	CFHR4	NM_001201550.2	5	13	7	7	5	5	6	8	11	1	1
Endogenous	CFHR5	NM_030787.3	3	4	8	2	5	7	5	5	7	13	8
Endogenous	CFI	NM_000204.3	89	354	634	247	195	628	251	613	586	514	1004
Endogenous	CFLAR	NM_001127183.1	1018	935	2408	517	1717	2189	1709	2476	3221	4357	3755
Endogenous	CFTR	NM_000492.3	9	335	585	243	351	351	981	193	343	436	516
Endogenous	CHI3L1	NM_001276.2	13	2353	774	201	185	420	380	261	110	722	720
Endogenous	CHMP4B	NM_176812.4	508	375	654	232	432	677	734	599	974	1098	1333
Endogenous	CHUK	NM_001278.3	251	518	655	399	390	553	712	618	905	792	839
Endogenous	CIITA	NM_000246.3	31	150	245	248	204	118	360	105	198	170	234
Endogenous	CKAP4	NM_006825.3	388	667	925	814	349	1121	957	624	856	931	1755
Endogenous	COL10A1	NM_000493.3	5	3	15	13	34	6	5	5	9	11	13
Endogenous	COL14A1	NM_021110.1	2805	80	488	234	381	198	256	608	281	213	1165
Endogenous	COL16A1	NM_001856.3	284	116	218	181	214	225	172	247	217	141	294
Endogenous	COL1A1	NM_000088.3	1539	765	820	7334	1433	1623	1491	536	651	483	6994
Endogenous	COL1A2	NM_000089.3	1767	1676	3376	4386	1508	4224	2388	2531	1618	646	5170
Endogenous	COL3A1	NM_000090.3	3542	5860	6844	15373	3372	9234	4787	2793	2946	1087	27629
Endogenous	COL4A1	NM_001845.4	3215	2023	4598	1992	3403	8181	4793	5582	3964	3730	12293
Endogenous	COL4A2	NM_001846.2	1723	1191	2183	2135	1769	3885	3328	3253	2846	2387	5023
Endogenous	COL5A1	NM_000093.3	939	807	1251	1376	688	2168	797	1105	1126	795	5255
Endogenous	COL5A3	NM_015719.3	217	137	366	311	504	972	637	506	629	464	501
Endogenous	COL6A3	NM_004369.3	1249	4033	3966	6166	1605	5775	3589	3960	3510	1808	11995
Endogenous	COL6A5	NR_022012.2	3	74	106	31	51	252	45	462	186	110	146
Endogenous	COL7A1	NM_000094.2	91	44	116	88	121	66	106	183	101	92	162
Endogenous	COX4I2	NM_032609.2	46	89	361	78	158	530	174	523	499	327	394
Endogenous	COX6A1	NM_004373.2	1174	1625	3135	849	1158	4152	1867	3077	3788	3838	4672
Endogenous	COX6B1	NM_001863.4	3017	1956	2544	1353	1375	3099	2389	2532	3041	2813	3474
Endogenous	COX7B	NM_001866.2	1919	795	1315	285	414	1783	670	1201	1585	1905	2743
Endogenous	COX7C	NM_001867.2	1843	1880	2099	958	1100	2199	2150	1486	2028	1691	2257
Endogenous	CPA3	NM_001870.2	36	91	421	145	210	770	302	611	597	596	821
Endogenous	CPB2	NM_001872.3	2	22	413	23	125	358	109	401	630	400	474
Endogenous	CPN1	NM_001308.2	4	4	7	3	2	9	12	6	6	10	10
Endogenous	CPT1A	NM_001876.3	232	287	392	221	244	618	439	571	511	537	487
Endogenous	CR1	XM_006711166.2	287	878	1019	525	360	516	608	392	1055	1184	958
Endogenous	CREB1	NM_004379.3	305	556	711	519	430	683	818	738	974	800	804
Endogenous	CREB3	NM_006368.4	132	117	170	107	99	240	178	199	232	207	237
Endogenous	CREBBP	NM_004380.2	528	694	1036	644	922	1080	1317	1257	1901	1663	1412
Endogenous	CRK	NM_016823.2	169	343	597	196	347	653	479	576	825	803	1021
Endogenous	CRKL	NM_005207.3	553	600	839	740	636	999	1241	964	1359	1304	1370
Endogenous	CRP	NM_000567.2	3	9	9	5	4	7	7	11	8	8	6
Endogenous	CSF1R	NM_005211.2	45	201	171	101	117	118	220	84	92	84	140
Endogenous	CSF3R	NM_000760.3	256	3024	3207	1608	1380	3003	3275	1419	4480	4229	3344
Endogenous	CSNK1A1	NM_001892.4	939	634	1376	274	816	1954	897	1487	2159	2712	5259
Endogenous	CSNK1D	NM_001893.3	455	726	1050	540	846	1245	1262	1100	1747	1639	2091
Endogenous	CSNK1E	NM_152221.2	685	520	1203	356	1098	1720	1089	2208	1916	1878	2132
Endogenous	CSNK1G3	NM_001031812.1	150	98	232	54	121	321	136	356	298	401	517
Endogenous	CSNK2A1	NM_177559.2	307	237	381	102	212	519	319	395	511	604	682
Endogenous	CSNK2B	NM_001320.5	866	1016	1649	575	920	1949	1235	1541	2537	2689	3176
Endogenous	CTBP2	NM_001329.2	323	314	655	301	510	726	570	704	911	995	857
Endogenous	CTNNB1	NM_001098210.1	1818	1648	3741	950	2097	3610	3192	4006	4892	5568	9585
Endogenous	CTNND1	NM_001331.2	1005	1654	3307	1754	2390	3455	3761	4375	4999	4294	4266
Endogenous	CTSB	NM_147780.2	2986	20845	11983	7378	5274	11445	10919	5405	9175	7185	20389
Endogenous	CTSD	NM_001909.3	4728	30973	29359	37365	11578	22875	46337	8769	20752	14266	20501
Endogenous	CTSL	NM_001912.4	377	1811	1389	672	431	2257	907	548	824	775	2880
Endogenous	CTSW	NM_001335.3	11	69	147	70	96	99	98	199	225	279	163
Endogenous	CUL1	NM_003592.2	470	366	667	210	483	744	598	739	978	1050	1196
Endogenous	CUL3	NM_003590.2	332	219	543	84	232	611	242	506	593	823	952
Endogenous	CXCL10	NM_001565.2	37	71	108	13	27	100	65	99	34	613	158
Endogenous	CXCL11	NM_005409.4	24	32	114	7	24	43	22	53	38	225	42
Endogenous	CXCL12	NM_199168.3	406	221	229	276	124	177	215	318	90	71	180
Endogenous	CXCL16	NM_001100812.1	153	1505	1512	1318	1192	1436	2618	1069	1716	1968	3263
Endogenous	CXCL2	NM_002089.3	301	4159	11786	1879	4644	3286	13462	8716	3308	17125	14341
Endogenous	CXCL8	NM_000584.2	64	1114	1741	152	513	758	1732	875	785	1603	4083
Endogenous	CXCR1	NM_000634.2	46	77	216	93	62	102	140	28	240	426	150
Endogenous	CXCR3	NM_001504.1	5	48	24	15	25	12	20	48	49	37	18
Endogenous	CXCR4	NM_003467.2	147	3413	2774	1513	2119	1346	2123	4600	2661	3452	3452
Endogenous	CXCR6	NM_006564.1	7	51	65	24	71	27	39	113	60	94	75
Endogenous	CYBB	NM_000397.3	433	2794	2320	1450	983	1672	3791	921	2808	1903	3926
Endogenous	CYCS	NM_018947.4	162	71	139	84	215	267	204	581	314	307	212
Endogenous	CYFIP1	NM_014608.2	380	1092	1318	1158	817	1216	1454	1136	1579	1242	1351
Endogenous	CYP1A1	NM_000499.3	4	13	54	9	7	6	19	8	10	46	18
Endogenous	CYP1A2	NM_000761.3	5	8	8	6	5	7	6	7	10	8	9
Endogenous	CYP27A1	NM_000784.3	155	1302	1277	1732	568	1132	1803	554	915	891	801
Endogenous	CYP2C19	NM_000769.1	2	6	11	5	11	9	7	5	7	10	2
Endogenous	CYP2C8	NM_000770.3	4	7	11	5	4	20	13	14	14	21	25
Endogenous	CYP2C9	NM_000771.3	5	7	9	8	11	10	17	12	11	9	8
Endogenous	CYP2E1	NM_000773.3	7	4	33	3	11	24	23	35	39	37	38
Endogenous	CYP2J2	NM_000775.2	523	39	73	13	49	70	36	50	75	58	66
Endogenous	CYP4A11/22	NM_001010969.3	7	8	16	6	13	23	27	51	141	101	38
Endogenous	CYP7A1	NM_000780.3	8	10	10	6	6	12	13	10	15	6	11
Endogenous	CYP8B1	NM_004391.2	1	4	6	3	4	6	6	10	3	6	5
Endogenous	DAPK1	NM_001288729.1	67	486	783	428	624	837	1087	794	1380	1210	878
Endogenous	DAXX	NM_001350.3	171	180	312	103	191	377	241	343	444	504	471
Endogenous	DDIT3	NM_004083.4	245	205	214	148	177	322	240	426	380	449	514
Endogenous	DDR2	NM_006182.2	1001	149	528	91	278	685	160	936	705	678	727
Endogenous	DEPDC5	NM_001136029.2	148	151	250	95	124	315	167	350	400	396	356
Endogenous	DERL1	NM_001134671.2	148	281	443	167	283	424	356	456	603	674	707
Endogenous	DERL2	NM_016041.3	129	175	282	77	126	351	175	285	376	474	532
Endogenous	DIAPH1	NM_005219.4	300	370	917	182	544	968	586	813	1156	1770	1797
Endogenous	DLL1	NM_005618.3	59	92	114	66	128	113	92	215	191	178	266
Endogenous	DLL4	NM_019074.2	59	174	546	143	294	653	419	590	519	598	386
Endogenous	DOCK1	NM_001290223.1	403	311	683	198	419	929	528	935	1029	1086	1065
Endogenous	DOCK2	NM_004946.2	150	656	854	405	454	695	845	630	1105	906	938
Endogenous	DUSP7	NM_001947.2	311	290	660	146	297	936	415	846	965	968	1360
Endogenous	DUSP8	NM_004420.2	474	66	405	72	282	346	253	461	356	580	878
Endogenous	DYNLL1	NM_003746.2	2906	2243	4293	1091	1889	3734	2368	4027	3267	3503	5994
Endogenous	E2F4	NM_001950.3	163	199	405	99	164	470	262	376	493	541	635
Endogenous	EEF2K	NM_013302.3	257	163	314	92	196	429	203	620	663	681	583
Endogenous	EGFR	NM_201282.1	371	232	653	157	433	1083	506	1227	1681	2043	1515
Endogenous	EGR1	NM_001964.2	1652	491	1122	1142	2011	2263	6504	6190	1470	5483	2185
Endogenous	EHMT1	NM_024757.3	295	436	771	310	517	858	724	908	1046	1093	895
Endogenous	ELN	NM_001081754.1	1880	203	1259	448	1345	3504	1036	3250	3272	3978	2941
Endogenous	ELOVL6	NM_001130721.1	22	81	79	22	30	131	36	86	71	122	194
Endogenous	EOMES	NM_005442.2	2	19	17	8	7	10	15	16	19	19	12
Endogenous	EP300	NM_001429.2	478	481	1041	181	609	1323	483	1086	1335	1815	1541
Endogenous	EP400	NM_015409.3	146	254	273	201	209	296	402	328	365	307	259
Endogenous	EPAS1	NM_001430.3	1399	1216	8627	696	3459	7934	2304	18918	13184	12664	7254
Endogenous	EPHX2	NM_001979.5	142	61	99	33	64	92	91	140	136	89	130
Endogenous	ERC1	NM_178040.1	622	314	534	216	348	686	464	730	701	754	655
Endogenous	ERN1	NM_001433.2	92	287	530	169	500	479	473	433	603	917	1024
Endogenous	ERO1A	NM_014584.1	552	1349	1161	814	862	1489	1216	1071	1395	1572	3126
Endogenous	ERP29	NM_001034025.1	748	2459	3212	1725	1664	3767	3201	2266	3351	2675	2890
Endogenous	F11R	NM_144503.1	113	853	1626	426	1067	1724	1283	1290	2431	2744	2839
Endogenous	F5	NM_000130.2	30	14	74	9	21	57	29	25	64	90	244
Endogenous	F8	NM_019863.2	88	100	100	22	345	109	199	138	113	223	831
Endogenous	FABP4	NM_001442.2	1894	463	1172	762	1202	13519	5846	1665	3273	1170	2740
Endogenous	FABP5	NM_001444.1	686	3399	3744	3379	1738	8801	6863	3099	6661	5348	7090
Endogenous	FADD	NM_003824.2	44	165	133	106	79	123	127	99	153	126	99
Endogenous	FAM30A	NR_026800.2	7	16	16	17	16	15	23	22	47	36	22
Endogenous	FAP	NM_004460.2	44	97	113	46	82	216	28	63	36	43	339
Endogenous	FAS	NM_000043.4	193	263	513	180	359	492	286	439	432	769	1113
Endogenous	FASN	NM_004104.4	135	2609	4486	1623	2870	3408	4037	1948	3585	3166	9365
Endogenous	FBP1	NM_000507.3	45	1114	2030	1352	1107	2485	3213	1668	4517	3612	5336
Endogenous	FCAR	NM_002000.2	27	112	176	62	58	177	65	134	203	303	270
Endogenous	FCER1A	NM_002001.2	1	7	66	22	44	37	20	46	164	80	42
Endogenous	FCER1G	NM_004106.1	685	4156	3115	3096	1196	2756	4771	1367	3004	2349	3901
Endogenous	FCGR3A/B	NM_000570.4	658	2277	2776	1416	1130	2198	2351	1519	3732	4263	4881
Endogenous	FCRL2	NM_001159488.1	6	25	26	23	21	14	28	18	44	41	36
Endogenous	FGA	NM_021871.2	10	26	422	222	319	71	353	172	58	315	210
Endogenous	FGB	NM_005141.3	9	6	18	3	4	10	15	9	16	18	9
Endogenous	FGD2	NM_173558.3	141	770	715	821	519	874	1331	645	1064	677	837
Endogenous	FGF19	NM_005117.2	4	7	9	4	6	8	8	6	9	8	8
Endogenous	FGF2	NM_002006.4	364	49	231	42	270	368	112	404	294	528	1234
Endogenous	FGF21	NM_019113.2	4	4	9	8	5	10	9	8	8	9	6
Endogenous	FGG	NM_000509.4	2	52	1360	1288	949	51	1032	1482	151	3047	686
Endogenous	FGL2	NM_006682.2	1048	224	561	144	236	369	278	660	720	595	684
Endogenous	FLI1	NM_001167681.2	144	262	586	124	264	892	263	749	1115	1138	1027
Endogenous	FLNB	NM_001164317.1	263	377	608	267	454	895	607	801	1016	1127	1037
Endogenous	FLT1	NM_002019.4	228	334	531	89	523	986	419	1360	1240	1891	4021
Endogenous	FLT4	NM_002020.1	31	109	358	49	163	334	130	447	455	475	358
Endogenous	FN1	NM_212482.1	6165	1911	9183	2732	4148	15682	3323	10519	11698	7547	23481
Endogenous	FNIP2	NM_020840.1	328	410	640	272	315	704	479	617	858	938	867
Endogenous	FOXP3	NM_014009.3	5	20	18	13	17	11	9	12	18	20	25
Endogenous	FPR1	NM_002029.3	71	618	227	285	160	276	316	219	346	545	649
Endogenous	FRS2	NM_006654.3	314	215	435	118	247	508	293	488	559	593	690
Endogenous	FST	NM_006350.2	112	45	121	93	227	220	114	427	420	321	580
Endogenous	FURIN	NM_002569.2	311	869	1162	540	813	1335	1254	1121	1253	1272	1580
Endogenous	FZD2	NM_001466.2	41	56	48	22	28	54	32	51	70	85	46
Endogenous	FZD5	NM_003468.2	69	739	697	401	340	864	859	745	1020	1316	882
Endogenous	GAB1	NM_002039.3	447	229	644	169	277	797	450	701	985	1152	822
Endogenous	GAS1	NM_002048.2	402	101	166	274	223	155	263	472	633	215	737
Endogenous	GATA3	NM_001002295.1	18	41	115	47	70	178	150	201	227	226	96
Endogenous	GBP4	NM_052941.4	117	227	1100	70	257	1000	224	1153	1080	1063	352
Endogenous	GBP5	NM_052942.3	66	262	284	95	188	106	165	335	237	321	219
Endogenous	GCNT1	NM_001097633.1	24	85	105	56	72	116	128	92	184	165	171
Endogenous	GLI1	NM_005269.1	18	9	13	10	11	24	18	27	29	21	29
Endogenous	GLI2	NM_005270.4	72	16	35	27	21	51	26	69	57	55	88
Endogenous	GLI3	NM_000168.5	132	84	217	42	121	328	132	369	294	312	294
Endogenous	GLP1R	NM_002062.3	8	5	16	4	6	4	12	20	17	4	13
Endogenous	GNB4	NM_021629.3	266	237	477	109	182	542	253	481	493	537	795
Endogenous	GNG2	NM_053064.4	83	92	388	58	121	293	135	261	325	331	358
Endogenous	GNLY	NM_012483.2	15	33	73	51	35	113	67	138	280	121	114
Endogenous	GNPTAB	NM_024312.3	190	253	432	79	206	501	179	507	516	723	624
Endogenous	GOT2	NM_002080.2	713	228	327	102	142	417	327	277	420	429	545
Endogenous	GPC4	NM_001448.2	199	463	436	210	319	565	466	643	641	785	753
Endogenous	GPR65	NM_003608.2	21	212	184	97	93	176	180	147	176	176	183
Endogenous	GPX2	NM_002083.2	4	22	33	18	14	34	54	18	15	17	20
Endogenous	GPX3	NM_002084.3	14026	4307	14264	3390	21782	54241	14142	30781	42822	58934	27745
Endogenous	GRB10	NM_001001555.2	308	270	444	370	379	546	566	550	785	677	712
Endogenous	GREM1	NM_013372.5	57	97	27	12	13	13	14	15	9	22	158
Endogenous	GSK3B	NM_002093.2	344	405	806	216	347	783	467	784	1123	1315	1071
Endogenous	GZMA	NM_006144.2	19	134	181	69	137	62	124	215	252	295	95
Endogenous	GZMB	NM_004131.3	12	129	203	43	155	148	88	384	307	450	267
Endogenous	GZMH	NM_033423.3	23	36	89	9	44	60	34	114	149	96	73
Endogenous	HADH	NM_001184705.2	638	295	570	145	264	573	408	508	508	719	1040
Endogenous	HADHA	NM_000182.4	1579	1191	1955	1018	1040	2440	1934	1916	2649	2556	3258
Endogenous	HAVCR1	NM_001173393.1	1	10	11	8	18	16	14	11	22	14	15
Endogenous	HCAR2	NM_177551.3	12	47	145	46	90	73	204	108	180	262	272
Endogenous	HCFC1	NM_005334.2	444	430	741	196	371	951	542	759	1020	1078	1035
Endogenous	HCK	NM_002110.2	329	1070	1771	721	685	1390	1519	689	1920	1816	2154
Endogenous	HDAC4	NM_006037.3	146	103	201	53	92	195	131	223	304	358	298
Endogenous	HDC	NM_002112.3	13	42	60	53	25	62	51	162	83	47	195
Endogenous	HIF1A	NM_001530.2	1063	2323	2940	1255	2796	4332	2088	2787	2701	2912	8864
Endogenous	HIF3A	NM_152796.2	910	429	795	340	1024	1749	971	2281	3037	2490	897
Endogenous	HIKESHI	NM_016401.4	343	211	418	85	185	460	219	454	508	723	778
Endogenous	HKDC1	NM_025130.3	1	50	126	55	58	85	38	66	35	89	70
Endogenous	HLA-A	NM_002116.5	3234	12755	16496	5372	6530	12631	13305	16148	16263	16237	14879
Endogenous	HLA-B	NM_005514.6	2604	10176	15530	6095	6530	11440	16200	12303	16134	13854	14939
Endogenous	HLA-DPA1	NM_033554.2	386	1153	3083	1422	1863	3191	2914	3806	5914	6964	8501
Endogenous	HLA-DQA1	NM_002122.3	3	2359	2696	6	2	9	9432	6	11258	11577	7431
Endogenous	HLA-DQA2	NM_020056.4	4	8	17	11	8	42	7	12	18	18	14
Endogenous	HLA-DRA	NM_019111.3	1264	7084	11614	7129	6096	11114	10991	12860	21095	21229	27427
Endogenous	HLA-E	NM_005516.4	2136	4605	9419	2989	5437	10211	6179	13223	15584	14233	8596
Endogenous	HLA-F	NM_001098479.1	233	470	1074	250	373	688	494	840	938	856	757
Endogenous	HLA-G	NM_002127.4	103	707	841	259	433	825	766	999	1777	1253	1910
Endogenous	HMGCS2	NM_005518.3	13	15	22	17	15	30	76	27	19	15	13
Endogenous	HMOX1	NM_002133.2	225	19252	3308	1384	1000	3492	6876	638	1200	716	2963
Endogenous	HSBP1	NM_001537.2	223	423	800	387	384	748	796	674	903	769	979
Endogenous	HSD11B1	NM_181755.1	41	181	133	75	113	290	81	373	190	327	272
Endogenous	HSD17B4	NM_000414.2	674	2644	2515	2053	909	2638	2216	1904	3040	2486	2875
Endogenous	HSP90AA1	NM_001017963.2	3197	2480	4343	1129	2095	3670	2976	4289	4795	5175	20002
Endogenous	HSP90AB1	NM_007355.3	6324	4421	5740	4303	3868	7225	8254	7251	8664	9429	21889
Endogenous	HSPG2	NM_005529.5	3941	1763	2989	1855	1734	4580	3183	3591	4455	4317	6073
Endogenous	HTRA2	NM_013247.4	84	161	154	173	112	182	255	186	207	184	136
Endogenous	HVCN1	NM_032369.3	55	139	131	243	80	86	262	91	151	109	81
Endogenous	ICAM1	NM_000201.2	190	1033	4749	447	2857	2572	3611	2520	2091	6383	6553
Endogenous	ICOS	NM_012092.2	6	26	31	17	35	26	46	47	41	62	58
Endogenous	IFI27	NM_005532.3	2488	1898	5685	1398	3026	5985	3837	11497	9297	10176	4446
Endogenous	IFI35	NM_005533.3	160	119	263	122	89	262	183	264	290	230	178
Endogenous	IFI6	NM_002038.3	2703	875	740	594	557	1914	1244	1155	1151	1418	901
Endogenous	IFNG	NM_000619.2	5	5	11	6	6	9	4	42	15	15	26
Endogenous	IFNGR1	NM_000416.2	918	3051	3832	1550	2291	4758	2979	6498	9507	9806	7107
Endogenous	IGF1	NM_000618.3	327	282	141	282	139	165	226	114	192	85	648
Endogenous	IGF1R	NM_000875.4	220	184	343	171	282	375	374	434	562	524	364
Endogenous	IHH	NM_002181.2	1	16	19	12	6	21	25	34	21	32	21
Endogenous	IKBKB	NM_001556.1	165	268	442	267	339	402	400	457	543	491	415
Endogenous	IL10	NM_000572.2	38	147	39	149	39	105	130	97	71	55	296
Endogenous	IL10RA	NM_001558.2	136	614	635	268	384	571	509	636	669	686	965
Endogenous	IL11	NM_000641.2	4	3	9	8	13	19	5	6	5	14	149
Endogenous	IL12RB2	NM_001559.2	13	14	17	4	15	12	9	15	12	14	29
Endogenous	IL13	NM_002188.2	5	6	12	1	11	19	11	12	21	22	26
Endogenous	IL17A	NM_002190.2	3	4	10	9	5	8	14	8	2	8	26
Endogenous	IL18R1	NM_003855.3	26	445	558	237	420	736	438	1204	1252	1416	810
Endogenous	IL1B	NM_000576.2	44	96	113	35	64	235	197	146	206	317	562
Endogenous	IL1R1	NM_001320984.1	196	386	593	243	498	939	438	750	685	815	1803
Endogenous	IL1RAP	NM_002182.2	172	291	433	265	552	462	718	420	748	806	1551
Endogenous	IL20RB	NM_144717.2	10	11	21	11	13	19	18	25	28	25	22
Endogenous	IL21R	NM_021798.2	7	42	59	14	35	34	40	77	56	38	47
Endogenous	IL27	NM_145659.3	3	20	17	7	9	19	15	12	11	20	17
Endogenous	IL2RA	NM_000417.1	11	82	83	45	57	28	36	37	98	47	82
Endogenous	IL2RB	NM_000878.2	13	82	117	53	82	58	71	145	141	206	83
Endogenous	IL33	NM_033439.2	381	195	861	81	218	374	162	654	532	207	1096
Endogenous	IL4	NM_000589.2	7	3	6	5	3	7	7	12	12	5	6
Endogenous	IL6	NM_000600.3	113	138	322	412	1436	189	1941	2446	314	705	6551
Endogenous	IL6ST	NM_002184.2	1708	1109	3137	459	1737	5046	1314	4968	4406	6556	6434
Endogenous	ILK	NM_004517.2	733	342	756	171	332	1185	490	1026	914	1027	1087
Endogenous	INPP5D	NM_005541.3	75	262	455	107	257	328	238	427	553	561	458
Endogenous	INSR	NM_000208.2	1032	410	708	305	862	1082	728	1190	1686	1808	1811
Endogenous	IQGAP1	NM_003870.3	1181	1197	2671	427	1200	3237	1387	2221	2872	4205	5014
Endogenous	IRAK3	NM_007199.1	107	857	672	412	511	680	808	805	1238	1104	1050
Endogenous	IRF1	NM_002198.2	60	276	356	219	403	281	868	398	380	523	385
Endogenous	IRF3	NM_001571.5	112	264	260	266	254	225	364	264	265	257	187
Endogenous	IRF4	NM_002460.1	14	129	54	107	113	75	138	205	174	179	234
Endogenous	IRF8	NM_002163.2	38	288	333	256	230	335	491	355	432	437	785
Endogenous	IRS1	NM_005544.2	47	40	115	18	64	99	77	190	196	254	198
Endogenous	ISG15	NM_005101.3	2041	424	598	145	282	1088	422	589	586	747	432
Endogenous	ISG20	NM_002201.5	108	359	494	244	540	609	588	624	738	1298	818
Endogenous	ITCH	NM_001257138.1	524	432	887	171	506	964	510	948	1090	1516	1631
Endogenous	ITGA1	NM_181501.1	884	362	2988	267	919	2952	727	3058	3011	2864	2207
Endogenous	ITGA4	NM_000885.4	54	194	410	103	211	219	219	465	296	255	303
Endogenous	ITGA5	NM_002205.2	1159	707	1134	435	1041	2106	1053	2167	1959	2379	3326
Endogenous	ITGA9	NM_002207.2	392	185	361	162	238	418	264	436	504	454	495
Endogenous	ITGB1	NM_002211.3	5186	2670	6507	2048	3587	8860	4474	7494	8360	10244	12780
Endogenous	ITGB3	NM_000212.2	206	25	85	21	100	144	112	163	108	62	150
Endogenous	ITPR2	NM_002223.2	307	715	800	374	598	867	674	783	1085	1124	1180
Endogenous	JAG1	NM_000214.2	884	161	700	98	388	1273	273	958	1554	987	1177
Endogenous	JAG2	NM_145159.1	169	144	449	122	201	263	270	357	321	254	467
Endogenous	JAK1	NM_002227.1	504	724	1226	443	807	1636	941	1570	1552	2364	2255
Endogenous	JAK2	NM_004972.3	471	168	543	103	322	620	279	734	903	985	721
Endogenous	JMJD4	NM_001161465.1	99	109	169	79	96	248	148	180	212	219	262
Endogenous	JUN	NM_002228.3	1916	596	1144	411	1567	4284	2651	8913	4851	5977	2835
Endogenous	KANSL1	NM_001193465.1	195	151	332	74	153	417	192	461	526	669	511
Endogenous	KAT6A	NM_001099412.1	423	574	1169	325	796	1125	819	1760	1865	1992	1696
Endogenous	KDM2A	NM_012308.1	291	405	742	196	440	852	562	768	1003	1134	1260
Endogenous	KDM3B	NM_016604.3	324	236	481	98	252	638	296	678	814	921	748
Endogenous	KDM5D	NM_001146705.1	5	282	632	133	328	665	321	803	732	7	7
Endogenous	KDR	NM_002253.2	249	175	607	95	477	1506	481	1484	1699	2034	1321
Endogenous	KIF3A	NM_007054.5	107	54	165	24	74	156	65	140	195	235	328
Endogenous	KIR2DL3	NM_015868.2	2	20	25	10	11	25	15	27	60	69	44
Endogenous	KIR3DL1/2	NM_001322168.1	2	16	14	5	29	26	15	30	17	34	12
Endogenous	KLF5	NM_001730.3	68	417	860	285	992	1039	941	856	1315	1359	1265
Endogenous	KLKB1	NM_000892.3	19	8	28	9	29	32	25	76	34	49	40
Endogenous	KLRB1	NM_002258.2	12	92	153	82	228	86	214	238	248	315	278
Endogenous	KLRD1	NM_007334.2	4	15	49	24	27	26	49	50	76	74	22
Endogenous	KLRK1	NM_007360.3	13	56	133	75	70	67	105	212	261	258	109
Endogenous	KMT2D	NM_003482.3	292	270	495	158	316	691	411	629	800	867	760
Endogenous	KNG1	NM_000893.2	4	13	9	8	9	13	15	7	10	12	14
Endogenous	KRAS	NM_033360.2	139	191	418	94	203	378	232	373	390	519	845
Endogenous	LAG3	NM_002286.5	31	65	63	43	75	54	76	75	77	71	117
Endogenous	LAMA3	NM_000227.3	55	187	500	79	278	661	251	620	736	941	484
Endogenous	LAMC1	NM_002293.3	1369	655	1667	429	1158	3785	1068	2472	2584	2830	2711
Endogenous	LAMTOR2	NM_001145264.1	213	384	462	199	231	626	397	365	514	441	635
Endogenous	LAMTOR4	NM_001008395.2	657	1388	1635	1022	952	1647	1908	1315	1977	1629	1645
Endogenous	LATS1	NM_004690.2	328	278	565	184	365	649	440	636	735	865	721
Endogenous	LATS2	NM_014572.2	647	529	1026	680	1142	1128	1187	1164	1438	1561	1924
Endogenous	LDLRAP1	NM_015627.2	149	99	353	35	139	307	116	413	355	510	448
Endogenous	LEP	NM_000230.2	5	24	20	5	7	18	9	9	14	16	23
Endogenous	LEPR	NM_001003679.1	201	356	488	129	809	1069	448	807	1116	1379	1131
Endogenous	LGALS3	NM_001177388.1	1224	1898	2291	1120	2081	5331	3062	2754	5031	5809	8218
Endogenous	LGMN	NM_001008530.2	1048	2143	2867	1379	1239	2436	1923	1330	2101	1832	3629
Endogenous	LILRB2	NM_001278405.1	144	471	855	204	267	719	483	726	863	579	1358
Endogenous	LIPA	NM_000235.3	273	1502	1367	952	527	3147	1437	1107	1585	1843	3710
Endogenous	LIPC	NM_000236.2	10	11	11	2	8	12	7	7	5	9	17
Endogenous	LIPG	NM_006033.2	5	58	36	44	92	41	57	23	10	28	178
Endogenous	LOX	NM_002317.4	215	93	453	89	469	689	161	752	708	952	1286
Endogenous	LOXL1	NM_005576.2	330	59	245	64	55	224	69	220	158	160	378
Endogenous	LOXL2	NM_002318.2	40	31	53	30	28	61	75	65	74	88	114
Endogenous	LOXL4	NM_032211.6	38	34	59	42	66	89	63	109	91	121	88
Endogenous	LPA	NM_005577.2	2	2	5	4	2	7	3	3	3	3	10
Endogenous	LPAR5	NM_020400.4	21	22	56	16	14	30	15	39	37	63	31
Endogenous	LPCAT1	NM_024830.3	72	2245	2988	1614	1172	2678	3220	1759	3366	2596	2242
Endogenous	LPL	NM_000237.2	449	331	1363	193	573	1593	891	1672	2511	1914	3697
Endogenous	LRP1	NM_002332.2	2375	1536	2583	1205	1481	2905	2169	3264	3340	2991	4276
Endogenous	LRP2	NM_004525.2	3	309	378	387	86	123	582	87	246	239	676
Endogenous	LRP6	NM_002336.1	265	198	400	133	219	460	314	539	439	556	472
Endogenous	LRRC32	NM_001128922.1	40	116	128	121	420	129	486	130	118	264	294
Endogenous	LTA	NM_000595.2	7	21	9	15	17	23	29	33	20	23	20
Endogenous	LTB	NM_002341.1	19	275	185	429	150	78	273	88	147	111	81
Endogenous	LYN	NM_002350.3	214	828	1402	272	464	1373	733	734	1423	1891	3075
Endogenous	MAF	NM_005360.4	363	773	1017	758	644	1068	825	901	855	836	703
Endogenous	MAML1	NM_014757.4	273	282	547	122	315	642	315	622	691	700	865
Endogenous	MAML2	NM_032427.2	199	156	374	78	258	501	242	491	450	570	530
Endogenous	MAML3	NM_018717.4	115	92	229	67	148	378	241	361	454	525	389
Endogenous	MAP1LC3A	NM_032514.2	811	413	767	305	773	910	963	1057	1318	1225	1002
Endogenous	MAP2K1	NM_002755.2	280	419	565	217	372	658	462	679	899	905	1429
Endogenous	MAP3K1	NM_005921.1	147	216	548	73	162	521	215	533	575	701	628
Endogenous	MAPK1	NM_138957.2	708	453	1336	185	516	1512	540	1285	1656	2321	2604
Endogenous	MAPK10	NM_138981.2	173	81	281	66	174	203	203	346	268	157	340
Endogenous	MAPK11	NM_002751.6	136	92	231	68	191	322	188	516	332	388	397
Endogenous	MAPK8	NM_002750.2	142	142	300	88	156	340	182	296	374	435	559
Endogenous	MAPK9	NM_001135044.1	412	231	637	74	235	728	256	634	636	1004	1033
Endogenous	MARCO	NM_006770.3	33	695	981	552	390	1623	3057	599	2117	2500	4309
Endogenous	MASP1	NM_001031849.2	132	10	127	15	53	43	84	139	117	58	89
Endogenous	MBTPS2	NM_015884.3	146	142	178	76	89	231	143	242	266	304	373
Endogenous	MECP2	NM_001110792.1	404	287	487	125	391	664	325	712	729	896	753
Endogenous	MEF2A	NM_005587.2	1949	814	1729	518	1331	2221	1537	2567	2740	2933	3102
Endogenous	MEFV	NM_000243.2	47	100	167	76	38	150	131	95	273	215	199
Endogenous	MET	NM_001127500.1	76	273	412	142	347	483	643	225	743	519	961
Endogenous	MFAP3	NM_001242336.1	73	97	108	84	87	122	142	108	184	161	217
Endogenous	MKI67	NM_002417.2	11	129	92	62	13	87	30	46	46	19	64
Endogenous	MLXIPL	NM_032951.2	44	57	87	112	66	58	125	68	142	104	88
Endogenous	MMP1	NM_002421.3	8	107	48	115	31	72	8	11	25	66	47
Endogenous	MMP10	NM_002425.1	2	12	21	8	17	14	6	9	11	11	27
Endogenous	MMP11	NM_005940.3	24	15	14	12	12	18	12	15	9	13	30
Endogenous	MMP12	NM_002426.3	6	81	15	16	6	34	26	8	15	35	21
Endogenous	MMP13	NM_002427.2	1	3	9	4	2	6	3	9	6	9	11
Endogenous	MMP14	NM_004995.2	335	514	624	437	486	960	500	649	647	725	1301
Endogenous	MMP16	NM_005941.4	59	7	12	3	6	10	7	15	9	5	23
Endogenous	MMP2	NM_004530.2	764	648	1671	382	1391	2657	975	2164	2145	1912	5131
Endogenous	MMP3	NM_002422.3	4	11	9	4	1	10	5	8	4	5	14
Endogenous	MMP7	NM_002423.3	6	284	227	251	202	88	193	95	103	266	863
Endogenous	MMP8	NM_002424.2	4	10	26	6	3	62	20	6	7	9	21
Endogenous	MMP9	NM_004994.2	97	2017	585	224	156	506	219	86	829	1301	252
Endogenous	MMRN1	NM_007351.2	33	111	212	96	129	1178	163	431	751	889	877
Endogenous	MMUT	NM_000255.2	287	150	313	61	186	455	183	386	427	669	563
Endogenous	MOB1B	NM_173468.3	144	171	357	134	171	386	333	333	457	336	454
Endogenous	MS4A1	NM_152866.2	18	40	56	66	48	39	81	53	70	86	48
Endogenous	MS4A2	NM_000139.3	7	30	99	30	59	112	41	156	125	91	87
Endogenous	MS4A4A	NM_024021.2	718	2531	1861	1296	1296	2107	1581	1030	1762	1503	2865
Endogenous	MTMR4	NM_004687.4	288	433	501	289	275	549	449	560	904	912	489
Endogenous	MTOR	NM_004958.3	263	346	464	352	306	556	611	472	701	656	537
Endogenous	MUC5B	NM_002458.1	3	760	1487	1719	908	11	846	32	78	23	404
Endogenous	MYD88	NM_002468.3	398	942	1592	888	819	1546	1993	1066	2105	1779	2364
Endogenous	MYL2	NM_000432.3	1072	5	6	1	4	9	4	8	6	9	4
Endogenous	MYLK	NM_053032.2	5603	701	3260	789	2317	4284	2249	4942	4318	3531	4437
Endogenous	NCAM1	NM_000615.5	918	17	36	20	47	61	13	89	59	82	91
Endogenous	NCEH1	NM_020792.4	144	383	736	380	383	875	759	378	774	828	1359
Endogenous	NCF1	NM_000265.4	90	455	391	223	169	180	404	158	612	424	182
Endogenous	NCF4	NM_000631.4	162	639	851	614	336	508	724	370	1061	787	421
Endogenous	NCK2	NM_001004720.2	226	197	509	135	198	592	305	582	592	650	577
Endogenous	NCKAP1L	NM_005337.4	213	810	865	289	382	896	554	530	938	924	1132
Endogenous	NCOA2	NM_006540.2	285	242	500	106	308	527	347	600	728	827	594
Endogenous	NCOR2	NM_006312.3	967	1947	2675	1396	1859	2912	2801	2945	4215	3986	3677
Endogenous	NCR1	NM_004829.5	7	38	75	29	35	40	41	59	98	127	39
Endogenous	NCSTN	NM_015331.2	454	539	763	251	414	955	595	849	1050	1140	1354
Endogenous	NDUFA1	NM_004541.3	3464	2086	2842	1534	1496	3290	2581	2633	3409	3074	3579
Endogenous	NDUFB5	NM_002492.3	947	518	869	256	429	1089	527	917	1104	1024	1507
Endogenous	NDUFB6	NM_002493.5	629	521	710	425	343	792	724	702	796	716	808
Endogenous	NDUFB8	NM_001284367.1	1243	1064	1327	600	729	1587	1161	1335	1859	1640	1902
Endogenous	NDUFC1	NM_002494.2	1746	1346	1291	1026	972	1702	2019	1430	1982	1616	2079
Endogenous	NDUFS3	NM_004551.1	714	569	922	331	393	1106	717	957	1243	1203	1462
Endogenous	NDUFS5	NM_004552.2	2768	1972	2203	822	1521	2839	2435	1927	2721	2867	4912
Endogenous	NEDD8	NM_006156.2	801	601	1070	325	382	1521	801	1013	1611	1713	2169
Endogenous	NF1	NM_000267.2	486	507	709	383	556	792	707	693	1015	938	1237
Endogenous	NFAM1	NM_145912.5	34	172	226	131	139	113	180	105	221	190	141
Endogenous	NFKB1	NM_003998.2	101	112	268	53	122	192	204	180	245	363	710
Endogenous	NID1	NM_002508.2	718	515	1112	725	1502	3200	2197	3094	3896	2534	2980
Endogenous	NID2	NM_007361.3	244	145	349	269	177	786	384	196	215	153	595
Endogenous	NKG7	NM_005601.3	30	541	635	143	258	286	242	645	873	820	277
Endogenous	NLRC4	NM_001199138.1	30	240	366	212	150	260	304	151	370	251	271
Endogenous	NLRP3	NM_001079821.2	30	68	112	61	110	144	138	299	178	155	705
Endogenous	NOS1	NM_000620.4	8	20	46	16	20	47	43	115	71	63	39
Endogenous	NOS3	NM_000603.4	50	77	121	19	234	149	47	292	130	232	368
Endogenous	NOTCH1	NM_017617.3	318	429	1078	187	485	1155	493	1052	1332	1580	1643
Endogenous	NOTCH2	NM_024408.3	880	863	1401	603	742	1213	1001	1087	1562	1564	1668
Endogenous	NOTCH3	NM_000435.2	954	355	784	250	409	997	653	710	786	415	1261
Endogenous	NOTCH4	NM_004557.3	164	429	1220	85	553	1141	450	1751	1686	1720	1566
Endogenous	NPC1	NM_000271.3	177	578	1238	370	569	1149	659	877	1203	1759	1680
Endogenous	NPHP4	NM_015102.3	67	105	241	69	167	224	119	214	296	244	324
Endogenous	NR1H2	NM_007121.4	148	137	229	115	195	193	204	195	271	227	211
Endogenous	NR1H3	NM_005693.2	80	441	246	195	269	266	362	159	197	163	183
Endogenous	NR1H4	NM_001206977.1	7	3	8	5	3	7	2	8	3	8	6
Endogenous	NRIP3	NM_020645.2	18	30	30	27	10	28	27	23	23	12	71
Endogenous	NRP2	NM_003872.2	273	1018	971	486	700	1142	939	1016	1255	1254	2372
Endogenous	NUMB	NM_001005743.1	383	463	1241	226	584	1341	702	1345	1597	1555	1461
Endogenous	OAS1	NM_001032409.1	733	530	597	306	306	800	354	501	640	663	240
Endogenous	OASL	NM_198213.1	71	32	62	15	57	110	113	70	131	83	134
Endogenous	OCLN	NM_002538.3	29	231	522	92	331	657	368	535	1257	1229	1225
Endogenous	OGT	NM_181673.2	476	678	1193	588	963	1367	1081	1183	1587	1431	1875
Endogenous	OSBPL5	NM_020896.3	70	31	84	29	65	101	72	120	134	146	152
Endogenous	P2RY13	NM_176894.1	39	130	158	74	55	132	136	124	457	208	111
Endogenous	P3H3	NM_014262.4	92	57	101	104	62	108	84	110	118	104	177
Endogenous	P4HB	NM_000918.3	980	2640	3342	1461	1171	4822	2233	2814	3010	3836	5666
Endogenous	PANX1	NM_015368.3	221	185	300	93	229	405	231	306	350	484	1038
Endogenous	PARP1	NM_001618.3	317	384	581	235	219	564	438	457	584	675	836
Endogenous	PARP4	NM_006437.3	381	858	1242	586	784	1326	1224	1254	1742	1884	1633
Endogenous	PC	NM_000920.3	54	123	92	167	104	137	175	95	118	135	176
Endogenous	PCCB	NM_000532.4	416	371	514	266	231	548	466	351	638	483	576
Endogenous	PCK1	NM_002591.2	12	7	7	8	3	9	10	8	9	9	13
Endogenous	PDE2A	NM_001143839.1	188	77	116	49	155	326	172	231	164	243	303
Endogenous	PDE3B	NM_000922.3	131	123	329	163	216	402	362	506	511	508	551
Endogenous	PDGFB	NM_033016.2	38	37	135	38	83	134	266	176	90	125	212
Endogenous	PDGFRB	NM_002609.3	1294	478	1241	479	1046	2581	1360	2867	2520	2053	2633
Endogenous	PDHA1	NM_000284.3	808	193	343	142	166	455	259	435	426	493	511
Endogenous	PECAM1	NM_000442.3	1014	1919	6406	709	3051	11270	2642	11416	11016	16331	9839
Endogenous	PELI1	NM_020651.3	332	670	1468	263	1012	1136	1129	1933	1413	2775	5027
Endogenous	PELI2	NM_021255.2	97	77	241	26	102	327	82	223	188	340	252
Endogenous	PGM1	NM_001172818.1	434	411	629	225	246	484	483	681	905	568	1165
Endogenous	PHLPP1	NM_194449.3	116	95	240	59	168	247	165	351	333	365	423
Endogenous	PHYKPL	NM_153373.3	59	234	218	197	196	184	307	217	300	230	220
Endogenous	PIDD1	NM_145886.2	22	102	76	96	48	83	143	74	111	84	62
Endogenous	PIK3C3	NM_002647.2	211	270	352	184	273	433	351	509	665	634	598
Endogenous	PIK3CA	NM_006218.2	289	259	526	173	357	564	387	637	791	764	773
Endogenous	PIK3CB	NM_006219.1	105	209	282	126	135	256	268	222	356	404	385
Endogenous	PIK3R4	NM_014602.1	235	188	399	96	173	497	229	485	553	638	636
Endogenous	PIK3R5	NM_001142633.1	108	611	679	401	486	781	717	516	845	857	1086
Endogenous	PKHD1	NM_138694.3	3	4	11	10	18	12	7	19	23	17	19
Endogenous	PLCB2	NM_004573.2	38	143	290	34	110	163	189	156	250	228	216
Endogenous	PLCB3	NM_000932.2	39	84	109	50	61	112	81	105	138	110	121
Endogenous	PLCG1	NM_002660.2	280	196	469	114	332	763	314	872	1111	1192	780
Endogenous	PLCG2	NM_002661.2	93	272	384	146	203	289	261	301	415	419	291
Endogenous	PLG	NM_000301.3	3	8	8	2	6	14	11	5	5	15	10
Endogenous	PLIN4	NM_001080400.1	835	75	87	46	135	170	140	84	161	164	128
Endogenous	PLPP4	NM_001030059.1	5	7	13	9	6	20	11	21	12	10	19
Endogenous	PLTP	NM_006227.2	5882	9192	4609	11064	4577	2106	4044	1598	1758	1074	6712
Endogenous	PNOC	NM_001284244.1	6	24	15	8	12	17	22	28	23	22	26
Endogenous	PNPLA3	NM_025225.2	4	12	30	49	18	68	65	18	49	68	30
Endogenous	POSTN	NM_001135935.1	420	174	367	276	350	1100	171	622	1445	171	944
Endogenous	PPARA	NM_001001928.2	171	83	166	72	120	211	126	228	219	254	228
Endogenous	PPARD	NM_006238.4	55	60	129	67	93	102	124	78	114	91	209
Endogenous	PPARG	NM_005037.5	117	215	431	153	195	510	492	366	671	759	765
Endogenous	PPARGC1A	NM_013261.3	324	95	211	74	178	184	128	246	259	180	306
Endogenous	PPM1A	NM_021003.4	776	503	1058	419	659	1079	798	1326	1632	1534	1442
Endogenous	PPP2CA	NM_002715.2	992	769	1478	411	795	1497	919	1175	1537	1815	2771
Endogenous	PRAP1	NM_145202.4	11	5	11	6	6	15	5	9	7	10	10
Endogenous	PRDX1	NM_002574.2	3027	4787	6961	2377	2786	8803	4752	5471	7553	8102	9271
Endogenous	PRDX6	NM_004905.2	1204	1252	1521	727	1120	2430	1853	2377	3009	3158	3020
Endogenous	PREX1	NM_020820.3	137	406	856	197	319	446	422	849	1225	815	677
Endogenous	PRF1	NM_005041.3	19	167	409	111	288	305	219	538	697	955	286
Endogenous	PRKAA1	NM_006251.5	516	357	788	215	481	1170	535	1030	1290	1436	1645
Endogenous	PRKAB2	NM_005399.3	501	188	349	125	173	465	234	457	539	503	443
Endogenous	PRKACA	NM_002730.3	1722	746	1224	594	598	1480	988	1370	1593	1541	1733
Endogenous	PRKACB	NM_182948.2	229	74	152	41	80	158	81	146	192	187	225
Endogenous	PRKAG1	NM_002733.3	240	158	238	90	123	351	171	259	344	406	459
Endogenous	PRKAG2	NM_016203.3	1270	163	413	65	211	566	212	563	628	732	821
Endogenous	PRKCA	NM_002737.2	54	120	223	71	164	402	167	326	340	331	389
Endogenous	PRKDC	NM_006904.6	551	1052	1006	1552	742	1088	1791	951	1488	1253	1271
Endogenous	PRLR	NM_001204318.1	9	9	30	7	9	17	14	26	14	7	14
Endogenous	PROS1	NM_000313.1	1141	600	1104	347	569	1125	686	968	1567	1275	1721
Endogenous	PSEN2	NM_000447.2	102	95	223	67	127	287	212	224	372	354	278
Endogenous	PSENEN	NM_172341.1	170	459	524	454	412	434	804	475	760	473	721
Endogenous	PSMB1	NM_002793.2	329	349	480	115	272	500	343	542	773	903	1057
Endogenous	PSMB7	NM_002799.2	775	609	1111	294	514	1521	779	1315	1567	1647	2198
Endogenous	PSMB8	NM_004159.4	447	1334	2221	653	705	1908	1214	1627	2161	1979	2042
Endogenous	PSMC3	NM_002804.4	19	32	58	28	20	54	47	33	51	52	55
Endogenous	PSMD13	NM_175932.2	365	281	695	111	249	987	339	679	871	1243	1495
Endogenous	PTAFR	NM_000952.3	57	709	662	314	236	454	646	224	548	480	554
Endogenous	PTCH1	NM_000264.4	67	66	171	47	117	248	100	347	414	526	184
Endogenous	PTGER4	NM_000958.2	92	345	469	380	503	528	813	855	867	829	587
Endogenous	PTGS2	NM_000963.1	87	105	209	292	529	209	510	405	355	669	1372
Endogenous	PTK2	NM_005607.4	607	375	864	248	562	1094	673	1021	1265	1126	1329
Endogenous	PTK2B	NM_004103.3	146	617	792	367	578	795	794	874	1490	1372	1793
Endogenous	PTPA	NM_021131.4	275	353	437	179	224	576	398	465	612	584	709
Endogenous	PTPN1	NM_002827.3	399	681	1445	315	882	2137	871	1634	1999	3020	5217
Endogenous	PTPN11	NM_002834.3	1272	598	1278	321	654	1615	791	1551	1913	2523	2237
Endogenous	PTPN12	NM_002835.3	485	483	1309	143	610	1464	525	1327	1644	2473	2458
Endogenous	PTPN6	NM_002831.5	95	446	684	226	302	623	562	535	930	931	1041
Endogenous	PTPRC	NM_080923.2	78	337	702	253	319	522	427	580	921	932	855
Endogenous	PYGM	NM_001164716.1	353	29	63	23	49	60	54	80	84	85	91
Endogenous	RAB7B	NM_001164522.1	34	58	123	141	97	142	222	72	89	69	229
Endogenous	RAC1	NM_006908.4	1929	2621	4202	1545	2315	5395	3807	5402	5926	6213	6918
Endogenous	RAC2	NM_002872.4	42	204	369	170	146	413	337	324	476	564	476
Endogenous	RAC3	NM_005052.2	15	79	51	141	61	85	129	63	72	61	67
Endogenous	RAP1B	NM_001010942.2	1123	1495	2901	742	1845	3820	2105	3874	4110	4393	6844
Endogenous	RAPGEF1	NM_005312.2	559	699	1439	388	858	1658	940	1838	1698	1947	1962
Endogenous	RAPGEF2	NM_014247.2	180	225	414	114	284	492	404	524	747	779	665
Endogenous	RASGRP4	NM_170604.1	87	229	339	203	134	272	353	184	517	399	196
Endogenous	RBX1	NM_014248.2	998	1119	1825	648	962	2408	1361	2067	2385	2827	2654
Endogenous	RELA	NM_021975.3	232	416	574	384	509	590	822	631	794	885	923
Endogenous	RELB	NM_006509.3	45	100	209	23	135	171	156	146	127	228	594
Endogenous	RELN	NM_005045.2	46	20	39	15	22	66	26	52	55	51	85
Endogenous	RETN	NM_020415.2	2	68	88	31	37	108	170	57	158	85	82
Endogenous	RGS7	NM_002924.2	4	4	9	8	4	5	8	10	8	5	17
Endogenous	RHO	NM_000539.2	7	8	7	5	7	14	11	19	13	14	21
Endogenous	RIPK3	NM_006871.3	43	164	242	74	159	254	156	211	315	268	230
Endogenous	RNF111	NM_017610.6	344	383	694	247	450	713	581	614	883	967	1041
Endogenous	RNF152	NM_173557.2	125	54	349	78	292	590	284	457	452	382	475
Endogenous	ROCK2	NM_004850.3	833	493	1046	508	751	1597	1116	2114	2112	2296	2269
Endogenous	RORA	NM_134261.2	151	99	287	92	279	395	208	685	560	612	545
Endogenous	RPS27A	NM_002954.5	9691	14998	21814	13975	12080	21136	22921	19215	26553	24422	35244
Endogenous	RPS6KA2	NM_021135.4	156	455	408	315	368	660	706	525	715	823	544
Endogenous	RPS6KB2	NM_003952.2	97	231	260	206	198	325	354	264	391	352	345
Endogenous	S100A12	NM_005621.1	94	346	3252	190	230	2347	597	383	5302	2503	1326
Endogenous	S100A4	NM_002961.2	2184	3026	7126	2535	3118	8547	5407	6469	10888	7580	8152
Endogenous	SAA1	NM_199161.1	150	6146	1032	9464	2817	338	4528	237	155	326	3386
Endogenous	SCD	NM_005063.4	65	651	4080	863	1524	4325	1989	1672	3459	3030	10231
Endogenous	SCIN	NM_033128.3	25	150	246	46	124	268	137	153	280	209	424
Endogenous	SDC3	NM_014654.3	502	855	644	602	582	581	726	818	831	711	949
Endogenous	SEC24C	NM_004922.2	489	944	1118	868	793	1181	1409	974	1301	1326	1274
Endogenous	SEC61B	NM_006808.2	822	1465	2393	619	903	3281	1569	2080	2473	3642	5311
Endogenous	SEH1L	NM_001013437.1	252	234	479	81	285	723	254	485	591	947	1282
Endogenous	SELENOS	NM_203472.1	39	79	96	55	61	117	95	142	150	134	147
Endogenous	SEM1	NM_001201451.1	3	3	9	6	3	7	6	3	7	8	10
Endogenous	SERPINE1	NM_000602.2	681	872	1579	410	2814	3263	1674	3780	706	3612	17032
Endogenous	SERPINF1	NM_002615.4	2763	983	1898	1518	1991	1762	1764	2655	2416	1333	6003
Endogenous	SERPING1	NM_000062.2	5141	2361	4780	1834	6118	7285	4904	10809	10866	11748	9576
Endogenous	SERPINH1	NM_001235.2	1375	1746	2487	1492	1195	2769	2329	1682	1802	2014	7424
Endogenous	SH2D1A	NM_002351.4	1	23	32	17	43	12	26	43	38	52	32
Endogenous	SIGLEC5	NM_003830.3	25	403	265	119	51	167	157	62	184	163	142
Endogenous	SIL1	NM_001037633.1	327	315	509	91	203	674	216	565	451	704	969
Endogenous	SIRT1	NM_012238.4	299	285	457	140	364	537	382	753	891	1019	834
Endogenous	SKI	NM_003036.2	988	866	1387	621	1139	1392	1327	1776	2085	1954	2995
Endogenous	SKP1	NM_170679.2	4592	3012	4373	2071	2769	5228	4422	5201	6722	6256	7894
Endogenous	SKP2	NM_005983.2	118	272	265	149	104	305	263	242	300	278	291
Endogenous	SLC25A10	NM_012140.3	40	103	76	81	60	115	117	84	78	91	76
Endogenous	SLC25A13	NM_001160210.1	109	190	303	110	164	387	198	312	476	477	545
Endogenous	SLC2A2	NM_000340.1	1	3	8	3	2	4	5	4	3	4	9
Endogenous	SLC37A4	NM_001164277.1	48	191	165	129	94	184	198	169	206	154	218
Endogenous	SMAD2	NM_001003652.3	873	650	1405	318	714	1842	822	1636	1866	2414	2177
Endogenous	SMAD3	NM_005902.3	411	204	569	98	492	635	331	617	809	982	945
Endogenous	SMAD4	NM_005359.3	601	610	1150	477	776	1188	850	1318	1678	1676	1407
Endogenous	SMAD6	NR_027654.1	111	470	1494	152	234	765	659	2995	1248	621	442
Endogenous	SMARCC2	NM_001130420.1	723	357	1027	163	489	1182	400	1390	1406	1779	1289
Endogenous	SMURF1	NM_181349.1	180	215	400	127	401	542	407	487	680	713	934
Endogenous	SNAI2	NM_003068.3	101	131	138	141	112	293	153	436	359	250	656
Endogenous	SOD1	NM_000454.4	356	197	352	219	219	353	392	335	419	399	398
Endogenous	SORBS1	NM_001034956.1	5918	159	690	177	661	642	456	1191	997	1026	1211
Endogenous	SOS1	NM_005633.2	377	346	570	192	414	606	454	603	666	711	545
Endogenous	SP1	NM_003109.1	252	333	588	177	350	512	385	530	657	730	438
Endogenous	SP3	NM_003111.3	792	579	1443	158	658	1848	467	1868	1735	2440	2373
Endogenous	SPIB	NM_003121.3	3	13	9	6	11	18	13	15	18	19	18
Endogenous	SPOP	NM_001007226.1	329	175	374	86	209	395	215	425	523	613	473
Endogenous	SPOPL	NM_001001664.1	413	241	564	109	284	655	242	693	780	925	915
Endogenous	SPP1	NM_000582.2	168	1454	549	414	128	2047	458	30	20	38	1533
Endogenous	SRC	NM_005417.3	248	232	481	99	225	501	235	428	557	672	682
Endogenous	SREBF1	NM_001005291.1	418	472	1345	358	1183	998	912	1051	1605	1370	2891
Endogenous	SSR2	NM_003145.3	382	860	1462	467	560	1857	1003	1314	1709	2134	2490
Endogenous	SSR4	NM_006280.1	733	1651	2313	965	817	2808	1820	2271	2499	2594	3709
Endogenous	STAT1	NM_139266.1	2088	1782	2226	517	904	1920	1210	1630	2002	3227	2431
Endogenous	STAT3	NM_003150.3	1827	2070	3150	1074	2252	3718	2693	3393	3923	5088	6503
Endogenous	STAT5A	NM_003152.2	148	197	299	133	242	328	268	325	479	405	534
Endogenous	STAT5B	NM_012448.3	290	147	468	55	199	490	180	446	540	699	609
Endogenous	STK4	NR_147975.1	96	287	527	160	252	545	301	570	825	824	633
Endogenous	SUFU	NM_001178133.1	119	159	241	63	123	261	152	331	301	288	257
Endogenous	SUGT1	NM_001130912.1	357	273	510	153	253	506	364	508	631	674	937
Endogenous	SYK	NM_003177.5	82	457	638	186	311	568	483	357	676	534	585
Endogenous	TBC1D4	NM_014832.2	351	91	420	74	181	568	184	427	725	839	720
Endogenous	TBL1XR1	NM_024665.4	599	446	918	206	400	1073	452	999	1027	1421	1510
Endogenous	TBX21	NM_013351.1	10	35	75	17	50	46	39	115	133	186	38
Endogenous	TCF7L1	NM_031283.1	222	218	234	88	165	383	217	270	307	348	449
Endogenous	TCF7L2	NM_001146274.1	571	222	632	106	340	731	407	911	931	1016	892
Endogenous	TCL1A	NR_049726.1	4	4	8	10	1	5	3	5	10	5	5
Endogenous	TEK	NM_000459.3	88	105	504	33	209	570	152	672	838	799	547
Endogenous	TGFB1	NM_000660.3	471	1549	1521	2263	1352	1658	3255	1661	2304	1679	2143
Endogenous	TGFB1I1	NM_001042454.1	1911	400	1053	319	697	1717	693	1674	1041	1177	1523
Endogenous	TGFBR1	NM_004612.2	433	399	803	242	445	720	408	735	992	967	1511
Endogenous	TGFBR2	NM_001024847.1	1879	1260	2711	1180	1808	3625	2635	3347	4944	4555	4400
Endogenous	THBS1	NM_003246.2	1977	3584	4572	5235	13321	12617	15355	7245	6716	11649	52926
Endogenous	THBS2	NM_003247.2	987	125	287	140	232	442	85	310	223	226	1151
Endogenous	THBS3	NM_001252607.1	241	164	272	165	338	366	300	313	383	345	483
Endogenous	TIMP1	NM_003254.2	3050	7369	5637	2822	2655	17914	1881	4025	2766	2373	22297
Endogenous	TIMP2	NM_003255.4	4004	1813	3285	1795	2747	4115	3350	3983	3721	3525	3974
Endogenous	TJP1	NM_003257.3	783	317	1239	134	652	2091	437	2299	2378	3513	2383
Endogenous	TJP2	NM_004817.2	175	153	365	60	225	371	186	505	421	496	504
Endogenous	TLN1	NM_006289.3	6160	2495	5892	1222	2990	7875	3346	8056	6991	8482	7698
Endogenous	TLR1	NM_003263.3	245	593	713	338	351	752	654	390	1007	887	799
Endogenous	TLR2	NM_003264.3	210	1575	1329	765	896	1202	1560	938	1706	1845	2753
Endogenous	TLR4	NM_138554.2	342	895	1108	331	793	1113	695	903	1390	1524	1485
Endogenous	TLR6	NM_006068.2	23	135	126	56	93	86	94	71	165	131	123
Endogenous	TLR8	NM_016610.2	38	212	209	108	88	144	215	134	413	339	393
Endogenous	TM6SF2	NM_001001524.2	18	9	16	18	13	29	25	28	31	33	34
Endogenous	TNF	NM_000594.2	27	38	40	34	34	81	103	162	135	103	106
Endogenous	TNFRSF17	NM_001192.2	5	45	40	7	32	19	48	57	80	68	78
Endogenous	TNFSF10	NM_003810.2	292	525	2714	415	734	1440	864	1361	2427	1479	695
Endogenous	TNFSF14	NM_003807.3	105	92	147	79	153	60	350	88	107	122	149
Endogenous	TNN	NM_022093.1	6	6	9	3	2	8	5	7	8	10	14
Endogenous	TPR	NM_003292.2	325	216	503	158	286	518	302	477	611	743	705
Endogenous	TPSAB1/B2	NM_003294.3	316	636	3998	1131	3125	10117	2050	6035	4259	5426	6559
Endogenous	TRADD	NM_003789.2	61	140	137	207	107	127	252	153	147	161	151
Endogenous	TRAF2	NM_021138.3	68	112	187	73	95	191	166	170	228	294	331
Endogenous	TRAF6	NM_145803.2	169	171	277	106	221	391	260	358	532	501	628
Endogenous	TRAT1	NM_016388.2	11	58	67	41	57	33	65	83	61	116	101
Endogenous	TRIB3	NM_021158.3	7	63	95	48	36	158	47	75	84	214	133
Endogenous	TRRAP	NM_003496.2	459	528	772	409	558	878	774	881	1099	1118	981
Endogenous	TTN	NM_133432.1	12020	252	529	152	486	551	811	463	841	792	1017
Endogenous	TXN	NM_003329.2	1173	5230	4028	1926	1660	4797	3617	2550	3968	5509	6683
Endogenous	TXN2	NM_012473.3	551	499	807	203	343	1072	447	807	1024	981	1249
Endogenous	TXNDC5	NM_030810.2	621	2390	1997	2254	1349	2202	2654	2129	2791	2364	3501
Endogenous	UBA52	NM_003333.3	3557	4982	7550	3228	3929	8773	7628	6357	8924	9049	12425
Endogenous	UBE2D2	NM_181838.1	487	386	668	277	357	838	504	816	1041	1270	1665
Endogenous	UBE2N	NM_003348.3	231	149	343	84	155	349	288	294	485	635	810
Endogenous	UBE4B	NM_006048.4	545	279	696	124	304	801	284	775	727	950	740
Endogenous	UQCRB	NM_006294.3	64	10	49	12	34	79	26	83	110	104	52
Endogenous	UQCRFS1	NM_006003.2	1044	710	893	353	487	963	726	782	1000	970	1363
Endogenous	UQCRH	NM_006004.2	1896	2019	1961	1689	1148	2249	2630	1406	2178	1587	2062
Endogenous	VAMP8	NM_003761.4	65	726	689	660	467	742	926	634	782	773	704
Endogenous	VAV1	NM_005428.2	45	154	247	45	63	170	136	124	215	207	265
Endogenous	VCAM1	NM_001078.3	138	82	124	56	97	66	66	96	61	62	318
Endogenous	VEGFA	NM_001025366.1	546	506	1433	303	1230	2132	679	2600	2109	3598	5253
Endogenous	VEGFB	NM_003377.3	527	342	626	197	387	846	402	663	654	798	615
Endogenous	VIM	NM_003380.2	19856	11028	18756	9903	16139	27268	20574	20631	25111	21492	43131
Endogenous	WAS	NM_000377.2	135	660	768	292	303	641	552	553	888	838	821
Endogenous	WWC1	NM_001161662.1	3	361	516	200	296	544	524	506	728	920	943
Endogenous	XAF1	NM_199139.2	580	249	382	169	314	298	308	447	408	463	207
Endogenous	XBP1	NM_005080.2	519	3052	2941	4454	2363	2136	5382	1915	2644	2557	2991
Endogenous	XCL1/2	NM_003175.3	9	24	42	14	9	30	34	83	54	85	116
Endogenous	XIAP	NM_001167.3	406	329	654	188	389	961	246	892	955	1109	1097
Endogenous	YWHAB	NM_003404.4	1036	2130	2867	2900	1684	3000	4189	2613	4246	3592	3722
Endogenous	YWHAE	NM_006761.4	1575	1221	2753	350	915	3288	1042	2692	3063	4553	5236
Endogenous	YWHAG	NM_012479.3	1942	1017	1801	408	1009	2459	1174	1734	1875	2735	4930
Endogenous	YWHAQ	NM_006826.2	1548	1488	2215	754	1264	3223	1734	2363	2840	3740	4428
Endogenous	ZFYVE16	NM_001105251.2	402	249	656	110	288	740	240	622	705	898	1059
Housekeeping	ACAD9	NM_014049.4	230	283	402	189	236	531	373	443	632	593	609
Housekeeping	ARMH3	NM_024541.2	258	456	631	313	430	686	669	629	919	901	707
Housekeeping	CNOT10	NM_001256741.1	112	142	278	81	122	263	186	267	378	388	395
Housekeeping	GUSB	NM_000181.3	376	1116	1493	1100	888	1568	1776	1274	2055	1618	2090
Housekeeping	MTMR14	NM_022485.3	249	473	596	297	357	779	655	663	984	967	843
Housekeeping	NOL7	NM_016167.3	531	359	576	148	302	1043	450	735	981	1266	1509
Housekeeping	NUBP1	NM_002484.3	221	336	469	249	301	535	403	393	556	553	642
Housekeeping	PGK1	NM_000291.2	1997	3544	3588	2671	1963	4033	4297	2966	4499	3728	7114
Housekeeping	PPIA	NM_021130.3	3127	8585	11378	6224	4864	14881	10990	10294	15000	15044	20306
Housekeeping	RPLP0	NM_001002.3	4874	13347	18950	8912	8871	25010	17254	14656	17690	15222	28634
