# Supplementary material for: Time-Dependent Molecular Motifs of Pulmonary Fibrogenesis in COVID-19
Source: Int J Mol Sci. 2022 Jan 29;23(3):1583. doi: 10.3390/ijms23031583 (PMC8835897; doi:10.3390/ijms23031583)
Supplement: Supplementary file 1 [file ijms-23-01583-s001.zip › Table S4.xlsx]

## Sheet: Tabelle1
Pathway	Association	Direction	FDR	Stage
Basement membrane (NS)	Fibrosis	up	0.005	Week 1
Basement membrane (NS)	Fibrosis	up	0.0091	Week 2 and later
Blood coagulation (NS)	Other	up	0.0171	Week 1
Blood coagulation (NS)	Other	up	0.1005	Week 2 and later
Cell adhesion (NS)	Other	up	0.0008	Week 1
Cell adhesion (NS)	Other	up	0.0091	Week 2 and later
Cell proliferation (NS)	Other	up	0.0283	Week 1
Cell proliferation (NS)	Other	up	0.1413	Week 2 and later
Cell-ECM interaction (NS)	Fibrosis	up	0.0301	Week 1
Cell-ECM interaction (NS)	Fibrosis	up	0.001	Week 2 and later
Collagen catabolic process (GO)	Fibrosis	up	0.3255	Week 1
Collagen catabolic process (GO)	Fibrosis	up	0.0076	Week 2 and later
Collagen Family (NS)	Fibrosis	up	0.0048	Week 1
Collagen Family (NS)	Fibrosis	up	0.0008	Week 2 and later
Collagen fibril organization (GO)	Fibrosis	up	0.7186	Week 1
Collagen fibril organization (GO)	Fibrosis	up	0.0113	Week 2 and later
Cytokine signaling (NS)	Inflammation	up	0.0405	Week 1
Cytokine signaling (NS)	Inflammation	up	0.5052	Week 2 and later
ECM receptor interaction (NS)	Fibrosis	up	0.0062	Week 1
ECM receptor interaction (NS)	Fibrosis	up	0.0058	Week 2 and later
ECM structure (NS)	Fibrosis	up	0.0008	Week 1
ECM structure (NS)	Fibrosis	up	0.0008	Week 2 and later
Epithelial to mesenchymal transition (NS)	Fibrosis	up	0.0048	Week 1
Epithelial to mesenchymal transition (NS)	Fibrosis	up	0.0058	Week 2 and later
Extracellular matrix organization (GO)	Fibrosis	up	0.3415	Week 1
Extracellular matrix organization (GO)	Fibrosis	up	0.0076	Week 2 and later
Innate immune system (NS)	Inflammation	up	0.0341	Week 1
Innate immune system (NS)	Inflammation	down	0.7232	Week 2 and later
Intrinsic apoptotic signaling pathway in response to endoplasmic reticulum stress (GO)	Other	up	0.0433	Week 1
Intrinsic apoptotic signaling pathway in response to endoplasmic reticulum stress (GO)	Other	up	0.0076	Week 2 and later
MHC class I antigen presentation (NS)	Inflammation	up	0.03	Week 1
MHC class I antigen presentation (NS)	Inflammation	up	0.3788	Week 2 and later
MMP remodeling (NS)	Inflammation	up	0.03	Week 1
MMP remodeling (NS)	Inflammation	up	0.0195	Week 2 and later
NF-κB signaling (NS)	Inflammation	up	0.0405	Week 1
NF-κB signaling (NS)	Inflammation	up	0.7046	Week 2 and later
NLR signaling (NS)	Inflammation	up	0.0442	Week 1
NLR signaling (NS)	Inflammation	down	0.6816	Week 2 and later
Th 17 differentiation (NS)	Inflammation	up	0.03	Week 1
Th 17 differentiation (NS)	Inflammation	up	0.5052	Week 2 and later
Type I interferon signaling (NS)	Inflammation	up	0.0283	Week 1
Type I interferon signaling (NS)	Inflammation	up	0.1852	Week 2 and later
Type I interferon signaling pathway (GO)	Inflammation	up	0.0433	Week 1
Type I interferon signaling pathway (GO)	Inflammation	up	0.1513	Week 2 and later
Type II interferon signaling (NS)	Inflammation	up	0.0323	Week 1
Type II interferon signaling (NS)	Inflammation	up	0.4587	Week 2 and later
